# Supplementary material for: Impacts of the proposal of the CNG2020 strategy on aircraft emissions of China–foreign routes
Source: Copernicus journal article supplement (doi:10.5194/essd-14-4419-2022), 2022-09-27
Supplement: Supplementary file 1 [file essd-14-4419-2022-supplement.zip]

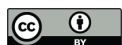

## *Supplement of*

# **Impacts of the proposal of the CNG2020 strategy on aircraft emissions of China–foreign routes**

**Qiang Cui et al.**

*Correspondence to:* Qiang Cui ([cuiqiang@seu.edu.cn](mailto:cuiqiang@seu.edu.cn))

- [essd-14-4419-2022-supplement-title-page.pdf](#)
- Supplementary Tables
  - [Supplementary Table S1.xlsx](#)
  - [Supplementary Table S2.xlsx](#)
  - [Supplementary Table S3.xlsx](#)
  - [Supplementary Table S4.xlsx](#)
  - [Supplementary Table S5.xlsx](#)
  - [Supplementary Table S6.xlsx](#)
  - [Supplementary Table S7.xlsx](#)

The copyright of individual parts of the supplement might differ from the article licence.
