# Supplementary material for: Impacts of the proposal of the CNG2020 strategy on aircraft emissions of China–foreign routes
Source: Copernicus journal article supplement (doi:10.5194/essd-14-4419-2022), 2022-09-27
Supplement: Supplementary file 2 [file essd-14-4419-2022-supplement.zip]

Archive with 9 entries (8 files):
- Supplementary Tables/
- Supplementary Tables/Supplementary Table S6.xlsx
- Supplementary Tables/Supplementary Table S2.xlsx
- Supplementary Tables/Supplementary Table S1.xlsx
- Supplementary Tables/Supplementary Table S5.xlsx
- Supplementary Tables/Supplementary Table S4.xlsx
- Supplementary Tables/Supplementary Table S7.xlsx
- Supplementary Tables/Supplementary Table S3.xlsx
- essd-14-4419-2022-supplement-title-page.pdf
