# Supplementary material for: Impacts of the proposal of the CNG2020 strategy on aircraft emissions of China–foreign routes
Source: Copernicus journal article supplement (doi:10.5194/essd-14-4419-2022), 2022-09-27
Supplement: Supplementary file 2 [file essd-14-4419-2022-supplement.zip › Supplementary Tables/Supplementary Table S1.xlsx]

## Sheet: S1-Data sources
Specific steps of data collection
Original data	Source	Operation steps
Route origin and destination data	https://map.variflight.com/	Search--Enter country of origin and country of destination--Enter date--Start search--Route origin and destination data
Flight data	https://map.variflight.com/ (APP)	Search the flight--By takeoff and landing location--Enter city of origin and city of destination-Enter date--Start search--Aircraft type, flying time, flying distance, transfer flight and airlines
