# Supplementary material for: Impacts of the proposal of the CNG2020 strategy on aircraft emissions of China–foreign routes
Source: Copernicus journal article supplement (doi:10.5194/essd-14-4419-2022), 2022-09-27
Supplement: Supplementary file 2 [file essd-14-4419-2022-supplement.zip › Supplementary Tables/Supplementary Table S2.xlsx]

## Sheet: S1-2014 emissions(tons)
No.	Chinese cities/airports	Foreign cities	Emirates												Air China												Austrian Airlines												China Eastern Airlines
			LTO						CCD						LTO						CCD						LTO						CCD						LTO						CCD
			CO2	CO	HC	NOx	PM2.5	SO2	CO2	CO	HC	NOx	PM2.5	SO2	CO2	CO	HC	NOx	PM2.5	SO2	CO2	CO	HC	NOx	PM2.5	SO2	CO2	CO	HC	NOx	PM2.5	SO2	CO2	CO	HC	NOx	PM2.5	SO2	CO2	CO	HC	NOx	PM2.5	SO2	CO2	CO	HC	NOx	PM2.5
1	Beijing	Dubai	13888.8	36.6004	2.30432	80.8192	0.893958	17.0255	337948	1607.96	93.8171	3727.15	29.3056	414.273	3608.36	9.96711	1.52987	20.0135	0.218896	4.4233	63540.6	368.943	56.7397	650.825	5.01485	77.891
2	Beijing	Vienna													2886.69	7.97369	1.2239	16.0108	0.175117	3.53864	66267.7	384.779	59.1749	678.758	5.23008	81.2341	2918.39	10.1491	1.71133	12.0528	0.176869	3.5775	72787.6	520.01	88.2956	573.23	6.57543	89.2265
3	Beijing	Sydney													3288.35	9.96711	1.52987	20.0135	0.218896	4.03101	100629	584.293	89.8582	1030.71	7.94197	123.355													2886.69	7.97369	1.2239	16.0108	0.175117	3.53864	41503.1	240.985	37.061	425.103	3.27557
4	Beijing	Saipan																																					2886.69	7.97369	1.2239	16.0108	0.175117	3.53864	35829.6	208.042	31.9947	366.991	2.8278
5	Beijing	Brussels
6	Beijing	Pyongyang													587.346	2.78964	0.263843	1.53375	0.0328417	0.719997	2116.27	21.8823	2.0955	11.5582	0.216053	2.59423
7	Beijing	Dusseldorf													3288.35	9.96711	1.52987	20.0135	0.218896	4.03101	87197.3	506.304	77.8643	893.133	6.88191	106.891
8	Beijing	Frankfurt													11041.8	60.1996	6.3072	100.375	0.876	13.5355	366122	3065.16	320.966	4816.47	28.7458	448.81
9	Beijing	Munich													4603.69	13.954	2.14182	28.0189	0.306454	5.64342	120577	700.121	107.671	1235.03	9.51636	147.809
10	Beijing	Moscow													3608.36	9.96711	1.52987	20.0135	0.218896	4.4233	62728.4	364.228	56.0145	642.507	4.95075	76.8955
11	Beijing	Saint Petersburg
12	Beijing	Yekaterinburg
13	Beijing	Irkutsk
14	Beijing	Paris													5520.88	30.0998	3.1536	50.1875	0.438	6.76775	182535	1528.18	160.022	2401.32	14.3316	223.76
15	Beijing	Manila													2055.71	8.3166	0.606776	7.17079	0.130086	2.51999	22832.6	182.991	13.4024	147.021	2.71311	27.9892
16	Beijing	Almaty
17	Beijing	Daegu													881.019	3.56426	0.260047	3.0732	0.0557511	1.08	4280.28	34.3042	2.51247	27.5611	0.508611	5.24697
18	Beijing	Busan													2055.71	8.3166	0.606776	7.17079	0.130086	2.51999	10653.7	85.3839	6.25359	68.6002	1.26595	13.0598
19	Beijing	Jeju													2055.71	8.3166	0.606776	7.17079	0.130086	2.51999	9918.09	79.4882	5.82178	63.8633	1.17853	12.1581													582.079	2.52733	0.267973	2.19221	0.0361496	0.71354	2860.53	24.9631	2.63861	19.8282	0.297915
20	Beijing	Seoul													17635.9	53.9694	7.43419	94.5157	1.10367	21.619	69406.3	435.81	59.0006	660.608	5.97108	85.0816
21	Beijing	Amsterdam
22	Beijing	Toronto
23	Beijing	Vancouver													1973.01	5.98026	0.917923	12.0081	0.131337	2.41861	57069	331.367	50.9608	584.539	4.50409	69.9579
24	Beijing	Siem Reap													587.346	2.78964	0.263843	1.53375	0.0328417	0.719997	5951.41	61.5378	5.89299	32.5041	0.607586	7.29552
25	Beijing	Male
26	Beijing	Boston
27	Beijing	Washington													3154.79	17.1999	1.80206	28.6786	0.250286	3.86729	125585	1051.39	110.096	1652.12	9.8602	153.948
28	Beijing	San Francisco													5520.88	30.0998	3.1536	50.1875	0.438	6.76775	210503	1762.33	184.541	2769.25	16.5275	258.045
29	Beijing	Los Angeles													11041.8	60.1996	6.3072	100.375	0.876	13.5355	401382	3360.36	351.878	5280.34	31.5142	492.034
30	Beijing	New York													11041.8	60.1996	6.3072	100.375	0.876	13.5355	469396	3929.77	411.503	6175.08	36.8543	575.408
31	Beijing	Honolulu													1973.01	5.98026	0.917923	12.0081	0.131337	2.41861	55443.1	321.926	49.5089	567.885	4.37576	67.9648
32	Beijing	Seattle
33	Beijing	Houston													5520.88	30.0998	3.1536	50.1875	0.438	6.76775	237421	1987.68	208.139	3123.36	18.6409	291.042
34	Beijing	Chicago
35	Beijing	Ulan Bator													2055.71	8.3166	0.606776	7.17079	0.130086	2.51999	10082.5	80.806	5.9183	64.9222	1.19807	12.3596
36	Beijing	Rangoon													1174.69	4.75234	0.346729	4.09759	0.0743349	1.43999	14729.3	118.047	8.64589	94.843	1.75023	18.0559
37	Beijing	Okinawa													587.346	2.37617	0.173365	2.0488	0.0371674	0.719997	4177.97	33.4842	2.45241	26.9023	0.496454	5.12156
38	Beijing	Osaka													7088.98	22.7996	3.07972	35.6916	0.432978	8.69001	46690.5	319.759	42.1838	423.071	4.10521	57.2354													3492.47	15.164	1.60784	13.1533	0.216898	4.28124	17561.7	153.256	16.1993	121.732	1.82899
39	Beijing	Tokyo													12740.4	44.8836	5.1094	69.546	0.822526	15.6178	109488	753.312	85.3404	1041.76	9.61323	134.216													4074.55	17.6913	1.87581	15.3455	0.253047	4.99478	24244.8	211.578	22.3639	168.057	2.52502
40	Beijing	Nagoya													2055.71	8.3166	0.606776	7.17079	0.130086	2.51999	14796.8	118.588	8.68551	95.2777	1.75825	18.1386													4074.55	17.6913	1.87581	15.3455	0.253047	4.99478	19751.4	172.383	18.221	136.924	2.05726
41	Beijing	Asahikawa																																					873.118	3.791	0.401959	3.28832	0.0542244	1.07031	8782.11	76.6391	8.10079	60.8747	0.914627
42	Beijing	Sapporo													881.019	3.56426	0.260047	3.0732	0.0557511	1.08	7519	60.2607	4.41354	48.4154	0.893456	9.21714
43	Beijing	Stockholm													3288.35	9.96711	1.52987	20.0135	0.218896	4.03101	79524.2	0	0	0	0	97.4845
44	Beijing	Geneva													1973.01	5.98026	0.917923	12.0081	0.131337	2.41861	55241.5	320.756	49.3289	565.821	4.35986	67.7177
45	Beijing	Jeddah
46	Beijing	Bangkok													4111.42	16.6332	1.21355	14.3416	0.260172	5.03998	52536.6	421.053	30.8382	338.287	6.24274	64.4019
47	Beijing	Phuket
48	Beijing	Chiang Mai													1174.69	4.75234	0.346729	4.09759	0.0743349	1.43999	13169.6	105.547	7.73038	84.8002	1.5649	16.1439
49	Beijing	Tashkent
50	Beijing	Madrid													3288.35	9.96711	1.52987	20.0135	0.218896	4.03101	100659	584.469	89.8852	1031.02	7.94436	123.393
51	Beijing	Singapore													10103.4	27.9079	4.28364	56.0377	0.612908	12.3852	141969	824.334	126.774	1454.15	11.2047	174.033
52	Beijing	Rome													4603.69	13.954	2.14182	28.0189	0.306454	5.64342	127580	740.784	113.925	1306.76	10.0691	156.394
53	Beijing	Milan													3288.35	9.96711	1.52987	20.0135	0.218896	4.03101	90848.6	527.506	81.1249	930.532	7.17009	111.367
54	Beijing	New Delhi													2886.69	7.97369	1.2239	16.0108	0.175117	3.53864	45951.4	266.813	41.0331	470.665	3.62665	56.3294													3288.35	9.96711	1.52987	20.0135	0.218896	4.03101	69871.8	405.705	62.3933	715.674	5.51453
55	Beijing	Bali																																					2165.02	5.98026	0.917923	12.0081	0.131337	2.65398	34223.1	198.714	30.5601	350.536	2.70101
56	Beijing	London													5520.88	30.0998	3.1536	50.1875	0.438	6.76775	181353	1518.28	158.986	2385.77	14.2388	222.311
57	Beijing	Ho Chi Minh City													1174.69	5.57929	0.527686	3.0675	0.0656833	1.43999	12673.6	131.046	12.5492	69.218	1.29386	15.5359
58	Beijing	Da Nang																																					291.039	1.26367	0.133986	1.09611	0.0180748	0.35677	2707.38	23.6266	2.49734	18.7666	0.281964
59	Changchun	Jeju
60	Changchun	Seoul
61	Changchun	Tokyo
62	Changchun	Nagoya
63	Changsha	Frankfurt
64	Changsha	Daegu
65	Changsha	Jeju
66	Changsha	Seoul																																					3946.02	11.9605	1.83585	24.0162	0.262675	4.83722	22414.2	130.146	20.0152	229.581	1.76901
67	Changsha	Bangkok
68	Changsha	Phuket
69	Chengdu	Melbourne
70	Chengdu	Karachi													582.079	2.52733	0.267973	2.19221	0.0361496	0.71354	8601.63	75.064	7.93431	59.6236	0.89583	10.5443
71	Chengdu	Frankfurt													1973.01	5.98026	0.917923	12.0081	0.131337	2.41861	60277.3	349.996	53.8257	617.4	4.7573	73.8908
72	Chengdu	Seoul													2910.39	12.6367	1.33986	10.9611	0.180748	3.5677	17405.4	151.892	16.055	120.648	1.81271	21.3363
73	Chengdu	Siem Reap
74	Chengdu	Male
75	Chengdu	State of Penang																																					582.079	2.52733	0.267973	2.19221	0.0361496	0.71354	6700.83	58.4763	6.18098	46.4479	0.697869
76	Chengdu	Katmandu													4365.59	18.955	2.00979	16.4416	0.271122	5.35155	23655.5	196.649	20.7859	156.199	2.34686	28.9981
77	Chengdu	Krabi
78	Chengdu	Bangkok																																					2037.28	8.84566	0.937904	7.67274	0.126524	2.49739	15944.9	139.147	14.7079	110.525	1.66061
79	Chengdu	Phuket																																					2037.28	8.84566	0.937904	7.67274	0.126524	2.49739	21319.3	186.048	19.6654	147.778	2.22034
80	Chengdu	Chiang Mai																																					587.346	2.37617	0.173365	2.0488	0.0371674	0.719997	3466.76	27.7842	2.03494	22.3227	0.411943
81	Chengdu	Surat Thani																																					587.346	2.37617	0.173365	2.0488	0.0371674	0.719997	5812.97	46.5878	3.41213	37.4301	0.690734
82	Chengdu	Singapore													2037.28	8.84566	0.937904	7.67274	0.126524	2.49739	25069.1	218.771	23.1242	173.77	2.61086	30.7309
83	Chengdu	Mumbai													1164.16	5.05466	0.535945	4.38442	0.0722992	1.42708	15405.1	134.436	14.21	106.783	1.60439	18.8843
84	Dalian	Jeju
85	Dalian	Seoul
86	Dalian	Osaka													881.019	3.56426	0.260047	3.0732	0.0557511	1.08	4881.16	39.1198	2.86517	31.4301	0.580011	5.98355
87	Dalian	Tokyo													1174.69	4.75234	0.346729	4.09759	0.0743349	1.43999	7574.55	60.706	4.44615	48.7731	0.900057	9.28524
88	Dalian	Fukuoka.													2055.71	8.3166	0.606776	7.17079	0.130086	2.51999	11003.3	88.1858	6.4588	70.8513	1.30749	13.4884
89	Dalian	Toyama
90	Dalian	Hiroshima													1468.37	5.94043	0.433411	5.12199	0.0929186	1.79999	7003.99	56.1332	4.11124	45.0992	0.832259	8.58582
91	Dalian	Nagoya
92	Fuzhou	Jeju
93	Fuzhou	Seoul
94	Fuzhou	Siem Reap
95	Fuzhou	Kuala Lumpur
96	Fuzhou	Osaka
97	Fuzhou	Bangkok
98	Fuzhou	Singapore
99	Fuzhou	Jakarta
100	Guangzhou	Dubai	6309.57	34.3998	3.60411	57.3571	0.500571	7.73457	160855	1346.68	141.016	2116.11	12.6294	197.184
101	Guangzhou	Brisbane
102	Guangzhou	Melbourne
103	Guangzhou	Perth
104	Guangzhou	Saipan
105	Guangzhou	Frankfurt
106	Guangzhou	Moscow
107	Guangzhou	Paris
108	Guangzhou	Manila
109	Guangzhou	Busan
110	Guangzhou	Jeju
111	Guangzhou	Seoul
112	Guangzhou	Amsterdam
113	Guangzhou	Vancouver
114	Guangzhou	Phnom Penh
115	Guangzhou	Siem Reap
116	Guangzhou	Male
117	Guangzhou	Penang
118	Guangzhou	Kuala Lumpur
119	Guangzhou	Los Angeles
120	Guangzhou	New York
121	Guangzhou	Dacca
122	Guangzhou	Rangoon
123	Guangzhou	Katmandu
124	Guangzhou	Osaka
125	Guangzhou	Tokyo
126	Guangzhou	Fukuoka
127	Guangzhou	Bangkok
128	Guangzhou	Phuket
129	Guangzhou	Chiang Mai
130	Guangzhou	Singapore
131	Guangzhou	Auckland
132	Guangzhou	New Delhi
133	Guangzhou	Bali
134	Guangzhou	Jakarta
135	Guangzhou	London
136	Guangzhou	Hanoi
137	Guangzhou	Ho Chi Minh City
138	Guangzhou	Da Nang
139	Guiyang	Phuket
140	Guilin	Seoul																																					1164.16	5.05466	0.535945	4.38442	0.0722992	1.42708	9368.38	81.7553	8.64158	64.9385	0.975685
141	Harbin	Osaka
142	Harbin	Niigata
143	Haikou	Singapore
144	Hailar	Chita													587.346	2.78964	0.263843	1.53375	0.0328417	0.719997	1525.31	15.7718	1.51034	8.33062	0.155721	1.8698
145	Hangzhou	Jeju													2037.28	8.84566	0.937904	7.67274	0.126524	2.49739	6404.51	55.8904	5.90764	44.3939	0.667008	7.85095													1455.2	6.31833	0.669931	5.48053	0.090374	1.78385	5319.51	46.4219	4.90682	36.8731	0.554009
146	Hangzhou	Cheongju
147	Hangzhou	Seoul													2037.28	8.84566	0.937904	7.67274	0.126524	2.49739	11587.3	101.119	10.6884	80.3194	1.20678	14.2043
148	Hangzhou	Bangkok																																					873.118	3.791	0.401959	3.28832	0.0542244	1.07031	9437.09	82.3549	8.70495	65.4147	0.982841
149	Hangzhou	Phuket																																					873.118	3.791	0.401959	3.28832	0.0542244	1.07031	11509.3	100.439	10.6164	79.7788	1.19866
150	Hangzhou	Da Nang
151	Hefei	Seoul													1455.2	6.31833	0.669931	5.48053	0.090374	1.78385	7512.23	65.5572	6.92943	52.0723	0.782374	9.20885
152	Jinan	Osaka
153	Jinan	Bangkok
154	Kiamusze	Seoul
155	Jieyang	Bangkok
156	Kunming	Dubai																																					2165.02	5.98026	0.917923	12.0081	0.131337	2.65398	32318.2	187.653	28.8591	331.024	2.55066
157	Kunming	Seoul																																					582.079	2.52733	0.267973	2.19221	0.0361496	0.71354	6131.85	53.511	5.65614	42.5039	0.638612
158	Kunming	Siem Reap																																					1174.69	5.57929	0.527686	3.0675	0.0656833	1.43999	6175.28	63.8526	6.11466	33.7268	0.630441
159	Kunming	Vientiane																																					2055.71	9.76375	0.92345	5.36813	0.114946	2.51999	7257.88	75.0467	7.18663	39.6395	0.740965
160	Kunming	Dacca																																					2055.71	8.3166	0.606776	7.17079	0.130086	2.51999	10904.7	87.3954	6.40091	70.2162	1.29577
161	Kunming	Mandalay																																					2055.71	9.76375	0.92345	5.36813	0.114946	2.51999	7080.86	73.2163	7.01135	38.6727	0.722893
162	Kunming	Naypyidaw																																					587.346	2.78964	0.263843	1.53375	0.0328417	0.719997	2451.68	25.3505	2.42761	13.3901	0.250295
163	Kunming	Rangoon													2037.28	8.84566	0.937904	7.67274	0.126524	2.49739	7917.57	69.0945	7.30332	54.8819	0.824588	9.70573													2643.06	12.5534	1.18729	6.90188	0.147787	3.23999	12064.2	124.744	11.9457	65.8894	1.23164
164	Kunming	Katmandu																																					2055.71	9.76375	0.92345	5.36813	0.114946	2.51999	15803	163.403	15.6479	86.3093	1.61334
165	Kunming	Colombo																																					881.019	4.18446	0.395764	2.30063	0.0492625	1.08	8713.11	90.0939	8.62758	47.5874	0.889532
166	Kunming	Krabi
167	Kunming	Bangkok																																					2643.06	12.5534	1.18729	6.90188	0.147787	3.23999	13582.3	140.441	13.4489	74.1807	1.38663
168	Kunming	Phuket.																																					881.019	3.56426	0.260047	3.0732	0.0557511	1.08	6548.13	52.4797	3.84366	42.1639	0.778091
169	Kunming	Chiang Rai																																					881.019	4.18446	0.395764	2.30063	0.0492625	1.08	2599.42	26.8781	2.5739	14.1969	0.265378
170	Kunming	Chiang Mai																																					2055.71	9.76375	0.92345	5.36813	0.114946	2.51999	7379	76.2991	7.30656	40.301	0.75333
171	Kunming	Koh Samui
172	Kunming	Singapore																																					2037.28	8.84566	0.937904	7.67274	0.126524	2.49739	21283.4	185.735	19.6323	147.53	2.2166
173	Kunming	Calcutta																																					2055.71	9.76375	0.92345	5.36813	0.114946	2.51999	12380.5	128.014	12.2589	67.6169	1.26393
174	Kunming	Da Nang																																					587.346	2.78964	0.263843	1.53375	0.0328417	0.719997	2733.67	28.2663	2.70684	14.9302	0.279084
175	Lhasa	Katmandu													1746.24	7.58199	0.803918	6.57663	0.108449	2.14062	6038.54	52.6967	5.57006	41.8571	0.628893	7.40233
176	lijiang	Bangkok																																					587.346	2.78964	0.263843	1.53375	0.0328417	0.719997	3453.56	35.71	3.41966	18.8619	0.352578
177	Manchuria	Irkutsk
178	Mudanjiang	Seoul
179	Nanchang	Bangkok																																					1746.24	7.58199	0.803918	6.57663	0.108449	2.14062	15549	135.692	14.3427	107.78	1.61937
180	Nanjing	Sydney																																					587.346					0.719997	2605.12
181	Nanjing	Jeju
182	Nanjing	Seoul																																					2037.28	8.84566	0.937904	7.67274	0.126524	2.49739	12468.9	108.813	11.5016	86.4303	1.29859
183	Nanjing	Osaka																																					582.079	2.52733	0.267973	2.19221	0.0361496	0.71354	3720.44	32.4673	3.43181	25.7888	0.387471
184	Nanjing	Tokyo																																					582.079	2.52733	0.267973	2.19221	0.0361496	0.71354	4543.62	39.6509	4.19112	4543.62	0.473203
185	Nanning	Seoul
186	Nanning	Phnom Penh																																					587.346	2.78964	0.263843	1.53375	0.0328417	0.719997	3125.91	32.322	3.09522	17.0724	0.319127
187	Nanning	Vientiane																																					587.346	2.78964	0.263843	1.53375	0.0328417	0.719997	2150.88	22.2401	2.12976	11.7472	0.219585
188	Nanning	Rangoon																																					293.673	1.39482	0.131921	0.766875	0.0164208	0.359998	1716.02	17.7437	1.69917	9.37218	0.17519
189	Nanning	Bangkok
190	Nanning	Singapore																																					582.079	2.52733	0.267973	2.19221	0.0361496	0.71354	5514.01	48.1193	5.08623	38.2213	0.574266
191	Nanning	Hanoi																																					293.673	1.39482	0.131921	0.766875	0.0164208	0.359998	442.09	4.57123	0.43775	2.41451	0.0451335
192	Ningbo	Jeju																																					2037.28	8.84566	0.937904	7.67274	0.126524	2.49739	6729.37	58.7254	6.2073	46.6457	0.700841
193	Ningbo	Cheongju																																					582.079	2.52733	0.267973	2.19221	0.0361496	0.71354	2902.39	25.3283	2.67722	20.1184	0.302274
194	Ningbo	Seoul
195	Ningbo	Bangkok																																					582.079	2.52733	0.267973	2.19221	0.0361496	0.71354	6416.25	55.9928	5.91847	44.4753	0.668231
196	Qingdao	Seoul													4092.99	17.1623	1.54468	14.8435	0.25661	5.01738	13253.5	111.074	10.0655	88.6972	1.47483	16.2468													8149.1	35.3826	3.75162	30.691	0.506094	9.98955	25557.6	223.034	23.5748	177.157	2.66174
197	Qingdao	Osaka																																					1164.16	5.05466	0.535945	4.38442	0.0722992	1.42708	7042.63	61.4591	6.49626	48.8171	0.733466
198	Qingdao	Fukuoka																																					2037.28	8.84566	0.937904	7.67274	0.126524	2.49739	10361.9	90.4259	9.55806	71.8255	1.07916
199	Qingdao	Nagoya																																					2037.28	8.84566	0.937904	7.67274	0.126524	2.49739	13087.1	114.207	12.0717	90.715	1.36297
200	Qingdao	Bangkok
201	Quanzhou	Jeju
202	Shanghai Pudong	Cairns																																					1315.34	3.98684	0.611949	8.00539	0.0875583	1.61241	31118.2	180.685	27.7875	318.733	2.45596
203	Shanghai Pudong	Melbourne													3288.35	9.96711	1.52987	20.0135	0.218896	4.03101	90087.2	523.084	80.4449	922.733	7.11	110.433													4603.69	13.954	2.14182	28.0189	0.306454	5.64342	126122	732.318	112.623	1291.83	9.954
204	Shanghai Pudong	Sydney													1973.01	5.98026	0.917923	12.0081	0.131337	2.41861	52733.3	306.192	47.0891	540.13	4.1619	64.643													4603.69	13.954	2.14182	28.0189	0.306454	5.64342	123044	714.448	109.875	1260.3	9.7111
205	Shanghai Pudong	Saipan
206	Shanghai Pudong	Copenhagen
207	Shanghai Pudong	Frankfurt													4603.69	13.954	2.14182	28.0189	0.306454	5.64342	138963	806.878	124.089	1423.35	10.9675	170.347													4603.69	13.954	2.14182	28.0189	0.306454	5.64342	138963	806.878	124.089	1423.35	10.9675
208	Shanghai Pudong	Munich													2630.68	7.97369	1.2239	16.0108	0.175117	3.22481	78689.1	456.902	70.2668	805.986	6.21042	96.4608
209	Shanghai Pudong	Moscow																																					3907.8	14.1663	2.42494	18.0959	0.252362	4.79037	98517.2	689.5	118.749	811.58	8.76689
210	Shanghai Pudong	Paris													2630.68	7.97369	1.2239	16.0108	0.175117	3.22481	81751.7	474.685	73.0016	837.355	6.45213	100.215													7234.37	21.9276	3.36572	44.0296	0.481571	8.86823	224817	1305.38	200.754	2302.73	17.7434
211	Shanghai Pudong	Manila																																					2328.31	10.1093	1.07189	8.76884	0.144598	2.85416	17697.7	154.443	16.3247	122.675	1.84316
212	Shanghai Pudong	Daegu																																					2037.28	8.84566	0.937904	7.67274	0.126524	2.49739	9022.5	78.7369	8.32253	62.541	0.939663
213	Shanghai Pudong	Busan																																					2037.28	8.84566	0.937904	7.67274	0.126524	2.49739	9312.4	81.2668	8.58994	64.5504	0.969855
214	Shanghai Pudong	Gwangju																																					1164.16	5.05466	0.535945	4.38442	0.0722992	1.42708	3955.94	34.5224	3.64903	27.4212	0.411997
215	Shanghai Pudong	Jeju																																					6167.14	24.9498	1.82033	21.5124	0.390258	7.55997	17795	142.617	10.4454	114.583	2.11451
216	Shanghai Pudong	Cheongju
217	Shanghai Pudong	Seoul																																					11180.4	33.8882	5.20156	68.0458	0.744245	13.7054	40790.7	236.848	36.4248	417.806	3.21935
218	Shanghai Hongqiao	Seoul																																					5051.71	13.954	2.14182	28.0189	0.306454	6.19262	17356.1	100.777	15.4984	177.773	1.3698
219	Shanghai Pudong	Yangyang
220	Shanghai Pudong	Amsterdam
221	Shanghai Pudong	Toronto																																					3330.49	4.74792	0.0580663	20.1977	0.211742	4.08267	111532	303.243	3.70747	1212.28	8.7156
222	Shanghai Pudong	Vancouver																																					5919.03	17.9408	2.75377	36.0242	0.394012	7.25583	177703	1031.82	158.683	1820.15	14.0249
223	Shanghai Pudong	Phnom Penh																																					2037.28	8.84566	0.937904	7.67274	0.126524	2.49739	22481.1	196.187	20.737	155.832	2.34134
224	Shanghai Pudong	Siem Reap																																					2037.28	8.84566	0.937904	7.67274	0.126524	2.49739	22171.1	193.481	20.4511	153.683	2.30905
225	Shanghai Pudong	Kuala Lumpur																																					1746.24	7.58199	0.803918	6.57663	0.108449	2.14062	26705.2	233.049	24.6334	185.111	2.78125
226	Shanghai Pudong	Sabah
227	Shanghai Pudong	Anchorage
228	Shanghai Pudong	San Francisco																																					4603.69	13.954	2.14182	28.0189	0.306454	5.64342	123839	719.06	110.584	1268.44	9.77379
229	Shanghai Pudong	Los Angeles																																					4603.69	13.954	2.14182	28.0189	0.306454	5.64342	135335	785.814	120.85	1386.19	10.6811
230	Shanghai Pudong	New York																																					6660.98	9.49584	0.116133	40.3954	0.423483	8.16535	232179	631.272	7.71797	2523.64	18.1436
231	Shanghai Pudong	Honolulu																																					2630.68	7.97369	1.2239	16.0108	0.175117	3.22481	70739.4	410.743	63.168	724.56	5.58301
232	Shanghai Pudong	Chicago
233	Shanghai Pudong	Nagasaki																																					291.039	1.26367	0.133986	1.09611	0.0180748	0.35677	1296.85	11.3172	1.19624	8.98929	0.135062
234	Shanghai Pudong	Okinawa																																					2037.28	8.84566	0.937904	7.67274	0.126524	2.49739	9055.59	79.0256	8.35305	62.7703	0.943109
235	Shanghai Pudong	Ibaraki
236	Shanghai Pudong	Osaka													8678.24	31.6453	4.01763	43.3643	0.559501	10.6382	41504	303.883	37.696	353.804	3.81886	50.8776													8167.54	34.8536	3.42049	30.189	0.509657	10.0122	47342.2	404.901	39.7881	322.461	5.1004
237	Shanghai Pudong	Tokyo													9017.75	34.4939	3.22762	44.6004	0.571824	11.0544	63059.3	477.143	44.9713	552.417	6.03664	77.301													10587	34.7601	4.91557	59.7078	0.695652	12.978	66900.2	429.199	60.1506	639.036	5.63194
238	Shanghai Hongqiao	Tokyo																																					2037.28	8.84566	0.937904	7.67274	0.126524	2.49739	13953.4	121.768	12.8709	96.7204	1.4532
239	Shanghai Pudong	Fukuoka.													4074.55	17.6913	1.87581	15.3455	0.253047	4.99478	21829.9	190.504	20.1364	151.318	2.27351	26.7602													5839.42	25.4789	2.15146	22.0143	0.386696	7.15824	26431.3	218.526	18.667	174.822	3.00278
240	Shanghai Pudong	Toyama
241	Shanghai Pudong	Okayama																																					2037.28	8.84566	0.937904	7.67274	0.126524	2.49739	10125.2	88.3595	9.33965	70.1842	1.0545
242	Shanghai Pudong	Takamatsu
243	Shanghai Pudong	Hiroshima																																					2037.28	8.84566	0.937904	7.67274	0.126524	2.49739	9334.79	81.4621	8.61059	64.7056	0.972186
244	Shanghai Pudong	Shizuoka																																					1174.69	4.75234	0.346729	4.09759	0.0743349	1.43999	7145.46	57.267	4.19428	46.0102	0.84907
245	Shanghai Pudong	Kagoshima																																					582.079	2.52733	0.267973	2.19221	0.0361496	0.71354	2778.73	24.2492	2.56315	19.2612	0.289395
246	Shanghai Pudong	Nagoya													2037.28	8.84566	0.937904	7.67274	0.126524	2.49739	10362.9	90.4343	9.55895	71.8322	1.07926	12.7033													6111.83	26.537	2.81371	23.0182	0.379571	7.49217	37934.5	331.044	34.9915	262.949	3.95075
247	Shanghai Pudong	Matsuyama																																					582.079	2.52733	0.267973	2.19221	0.0361496	0.71354	2174.08	18.9726	2.00541	15.07	0.226423
248	Shanghai Pudong	Sendai													587.346	2.37617	0.173365	2.0488	0.0371674	0.719997	4354.13	34.896	2.55581	28.0365	0.517385	5.33749
249	Shanghai Pudong	Komatsu																																					1164.16	5.05466	0.535945	4.38442	0.0722992	1.42708	5961.7	52.0261	5.49919	41.3245	0.620891
250	Shanghai Pudong	Niigata																																					582.079	2.52733	0.267973	2.19221	0.0361496	0.71354	4228.75	36.9031	3.90068	29.3123	0.44041
251	Shanghai Pudong	Asahikawa																																					291.039	1.26367	0.133986	1.09611	0.0180748	0.35677	2589.87	22.6011	2.38895	17.9521	0.269727
252	Shanghai Pudong	Sapporo																																					1455.2	6.31833	0.669931	5.48053	0.090374	1.78385	12310	107.426	11.355	85.329	1.28205
253	Shanghai Pudong	Saga
254	Shanghai Pudong	Krabi
255	Shanghai Pudong	Bangkok																																					6640.96	22.7996	3.07972	35.6916	0.432978	8.14081	74408.3	501.502	67.1447	683.392	6.47247
256	Shanghai Pudong	Phuket
257	Shanghai Pudong	Chiang Mai																																					291.039	1.26367	0.133986	1.09611	0.0180748	0.35677	3160.21	27.5783	2.91504	21.9055	0.329126
258	Shanghai Pudong	Singapore																																					18414.8	55.8158	8.56728	112.075	1.22582	22.5737	252337	1465.17	225.328	2584.6	19.9153
259	Shanghai Pudong	Auckland
260	Shanghai Pudong	Rome																																					4603.69	13.954	2.14182	28.0189	0.306454	5.64342	139912	812.391	124.937	1433.08	11.0424
261	Shanghai Pudong	Milan													4603.69	13.954	2.14182	28.0189	0.306454	5.64342	139269	808.658	124.363	1426.49	10.9916	170.723
262	Shanghai Pudong	New Delhi																																					3946.02	11.9605	1.83585	24.0162	0.262675	4.83722	58685.9	340.755	52.4046	601.1	4.6317
263	Shanghai Pudong	Bali																																					1973.01	5.98026	0.917923	12.0081	0.131337	2.41861	30883	179.32	27.5775	316.324	2.43739
264	Shanghai Pudong	London																																					3288.35	9.96711	1.52987	20.0135	0.218896	4.03101	100626	584.278	89.8559	1030.68	7.94177
265	Shanghai Pudong	Ho Chi Minh City																																					1174.69	4.75234	0.346729	4.09759	0.0743349	1.43999	12407.7	99.4414	7.28317	79.8944	1.47437
266	Shanghai Pudong	Da Nang
267	Shenzhen	Jeju
268	Shenzhen	Seoul
269	Shenzhen	Sabah
270	Shenzhen	Mauritius
271	Shenzhen	Bangkok
272	Shenzhen	Phuket
273	Shenzhen	Singapore
274	Shenzhen	Bali
275	Shenzhen	Da Nang
276	Shenyang	Busan
277	Shenyang	Jeju
278	Shenyang	Cheongju
279	Shenyang	Seoul
280	Shenyang	Vancouver
281	Shenyang	Osaka
282	Shenyang	Tokyo
283	Shenyang	Nagoya
284	Shijiazhuang	Seoul
285	Taiyuan	Seoul
286	Taiyuan	Bangkok																																					587.346	2.37617	0.173365	2.0488	0.0371674	0.719997	6607.49	52.9555	3.8785	42.5461	0.785145
287	Tianjin	Irkutsk
288	Tianjin	Gwangju
289	Tianjin	Jeju
290	Tianjin	Seoul													4111.42	16.6332	1.21355	14.3416	0.260172	5.03998	18280.1	146.505	10.7301	117.707	2.17216	22.4086
291	Tianjin	Siem Reap
292	Tianjin	Okinawa
293	Tianjin	Osaka													1174.69	4.75234	0.346729	4.09759	0.0743349	1.43999	7561	60.5974	4.4382	48.6859	0.898447	9.26863
294	Tianjin	Shizuoka
295	Tianjin	Bangkok
296	Weihai	Seoul																																					2037.28	8.84566	0.937904	7.67274	0.126524	2.49739	4645.18	40.5372	4.2848	32.1988	0.48378
297	Wenzhou	Jeju																																					587.346	2.37617	0.173365	2.0488	0.0371674	0.719997	2592.54	20.7778	1.52178	16.6936	0.308062
298	Wenzhou	Seoul
299	Wenzhou	Bangkok
300	Wenzhou	Rome																																					2886.69	7.97369	1.2239	16.0108	0.175117	3.53864	42625.8	247.508	38.0642	436.61	3.36424
301	Urumqi	Dubai
302	Urumqi	Baku
303	Urumqi	Islamabad
304	Urumqi	Moscow
305	Urumqi	Novosibirsk
306	Urumqi	Tbilisi
307	Urumqi	Almaty
308	Urumqi	Seoul
309	Urumqi	Osh
310	Urumqi	Bishkek
311	Urumqi	Dushanbe
312	Urumqi	Khujand
313	Urumqi	Istanbul
314	Urumqi	Ashkhabad
315	Urumqi	Tashkent
316	Urumqi	Teheran
317	Wuxi	Osaka
318	Wuxi	Singapore																																					873.118	3.791	0.401959	3.28832	0.0542244	1.07031	13204.6	115.233	12.1802	91.53	1.37522
319	Wuhan	Moscow
320	Wuhan	Jeju																																					4111.42	16.6332	1.21355	14.3416	0.260172	5.03998	14322	114.783	8.40679	92.2202	1.70183
321	Wuhan	Seoul
322	Wuhan	Kuala Lumpur																																					293.673	1.18809	0.0866823	1.0244	0.0185837	0.359998	3791.16	30.3841	2.22536	24.4116	0.45049
323	Wuhan	Osaka
324	Wuhan	Krabi																																					881.019	3.56426	0.260047	3.0732	0.0557511	1.08	10098.3	80.9324	5.92756	65.0237	1.19995
325	Wuhan	Bangkok
326	Wuhan	Chiang Mai													582.079	2.52733	0.267973	2.19221	0.0361496	0.71354	4609.37	40.2247	4.25177	31.9506	0.48005	5.65039
327	Wuhan	Singapore
328	Xi'an	Moscow																																					1167.36	4.05963	0.684531	4.82113	0.0707474	1.431	21763.7	155.485	26.4007	171.398	1.96608
329	Xi'an	Paris
330	Xi'an	Jeju
331	Xi'an	Seoul																																					4074.55	17.6913	1.87581	15.3455	0.253047	4.99478	16629.4	145.121	15.3393	115.27	1.7319
332	Xi'an	Siem Reap																																					291.039	1.26367	0.133986	1.09611	0.0180748	0.35677	2672.88	23.3255	2.46551	18.5275	0.278371
333	Xi'an	Krabi																																					291.039	1.26367	0.133986	1.09611	0.0180748	0.35677	3520.35	30.7212	3.24724	24.4019	0.366633
334	Xi'an	Bangkok
335	Xi'an	Phuket
336	Xiamen	Manila
337	Xiamen	Jeju
338	Xiamen	Seoul
339	Xiamen	Siem Reap
340	Xiamen	Kuala Lumpur
341	Xiamen	Bangkok
342	Xiamen	Singapore
343	Xiamen	Jakarta													881.019	3.56426	0.260047	3.0732	0.0557511	1.08	11938.6	95.6817	7.0078	76.8737	1.41863	14.6349
344	Yantai	Seoul																																					6111.83	26.537	2.81371	23.0182	0.379571	7.49217	16229.2	141.627	14.9701	112.495	1.69021
345	Yantai	Osaka																																					873.118	3.791	0.401959	3.28832	0.0542244	1.07031	5000.11	43.6346	4.6122	34.6591	0.520745
346	Yanji	Vladivostok
347	Yanji	Busan
348	Yanji	Cheongju
349	Yanji	Seoul													2055.71	8.3166	0.606776	7.17079	0.130086	2.51999	6846.76	54.8731	4.01895	44.0868	0.813577	8.39308
350	Yancheng	Seoul																																					291.039	1.26367	0.133986	1.09611	0.0180748	0.35677	1530.79	13.3588	1.41203	10.611	0.159427
351	Zhangjiajie	Daegu
352	Zhangjiajie	Busan
353	Zhangjiajie	Gwangju
354	Zhangjiajie	Cheongju
355	Zhengzhou	Jeju
356	Zhengzhou	Seoul
357	Zhengzhou	Krabi
358	Zhengzhou	Bangkok
359	Zhengzhou	Phuket
360	Chongqing	Sydney
361	Chongqing	Jeju
362	Chongqing	Seoul													2055.71	8.3166	0.606776	7.17079	0.130086	2.51999	16974.1	136.038	9.96353	109.297	2.01697	20.8076
363	Chongqing	Phnom Penh
364	Chongqing	Siem Reap
365	Chongqing	Osaka
366	Chongqing	Phuket
367	Chongqing	Chiang Mai
[truncated: 866 more columns]
