# Supplementary material for: Impacts of the proposal of the CNG2020 strategy on aircraft emissions of China–foreign routes
Source: Copernicus journal article supplement (doi:10.5194/essd-14-4419-2022), 2022-09-27
Supplement: Supplementary file 2 [file essd-14-4419-2022-supplement.zip › Supplementary Tables/Supplementary Table S3.xlsx]

## Sheet: S2-2015 emissions(tons)
No.	Chinese cities/airports	Foreign cities	Emirates												Air China												Azerbaijan Airlines												Egypt Air
			LTO						CCD						LTO						CCD						LTO						CCD						LTO						CCD
			CO2	CO	HC	NOx	PM2.5	SO2	CO2	CO	HC	NOx	PM2.5	SO2	CO2	CO	HC	NOx	PM2.5	SO2	CO2	CO	HC	NOx	PM2.5	SO2	CO2	CO	HC	NOx	PM2.5	SO2	CO2	CO	HC	NOx	PM2.5	SO2	CO2	CO	HC	NOx	PM2.5	SO2	CO2	CO	HC	NOx	PM2.5
1	Beijing	Dubai	14484.9	49.3686	3.77498	101.25	1.01674	17.7563	346253	1932.01	138.046	4122.11	29.5713	424.453	3608.36	9.96711	1.52987	20.0135	0.218896	4.4233	65499.7	380.44	58.5077	671.104	5.17111	80.2926
2	Beijing	Baku																									1674.77	6.07127	1.03926	7.7554	0.108155	2.05302	32684.9	228.827	39.4097	269.342	2.9095	40.0667
3	Beijing	Cairo																																					1973.01	5.98026	0.917923	12.0081	0.131337	2.41861	3830.13	22.2464	3.42127	39.2432	0.302383
4	Beijing	Vienna													2886.69	7.97369	1.2239	16.0108	0.175117	3.53864	67392.1	448.378	68.9559	790.949	6.09456	82.6124
5	Beijing	Melbourne													2886.69	7.97369	1.2239	16.0108	0.175117	3.53864	78705.5	457.142	70.3037	806.409	6.21368	96.4809
6	Beijing	Sydney													3608.36	9.96711	1.52987	20.0135	0.218896	4.4233	98759.2	573.619	88.2167	1011.88	7.79689	121.064
7	Beijing	Lahore
8	Beijing	Karachi													1164.16	5.05466	1.36906	9.64226	0.141495	1.42708	12215.3	106.634	11.2712	84.6995	1.27259	14.9742
9	Beijing	Islamabad
10	Beijing	Saint Paul													2630.68	7.97369	1.2239	16.0108	0.175117	3.22481	75627.1	439.262	67.5539	774.868	5.97064	92.7072
11	Beijing	Minsk													2886.69	7.97369	1.2239	16.0108	0.175117	3.53864	58960.8	342.46	52.6668	604.107	4.65487	72.2769
12	Beijing	Saipan
13	Beijing	Brussels
14	Beijing	Warsaw
15	Beijing	Pyongyang													881.019	4.18446	0.395764	2.30063	0.0492625	1.08	3004.85	31.0801	2.9763	16.4165	0.306866	3.68349
16	Beijing	Copenhagen
17	Beijing	Dusseldorf													3608.36	9.96711	1.52987	20.0135	0.218896	4.4233	85994.3	499.478	76.8145	881.09	6.78912	105.416
18	Beijing	Frankfurt													11041.8	60.1996	6.3072	100.375	0.876	13.5355	347748	2912.26	304.956	4576.21	27.3119	426.287
19	Beijing	Munich													5051.71	13.954	2.14182	28.0189	0.306454	6.19262	118913	690.681	106.22	1218.38	9.38805	145.77
20	Beijing	Saint Petersburg
21	Beijing	Chita													1174.69	5.57929	1.2239	16.0108	0.175117	1.43999	4343.7	44.9283	4.30243	23.731	0.443594	5.32472
22	Beijing	Irkutsk
23	Beijing	Novosibirsk
24	Beijing	Moscow													4924.77	17.3317	1.68294	29.7568	0.315214	6.03701	98445.4	660.487	64.1824	1068.06	7.92875	120.679
25	Beijing	Vladivostok
26	Beijing	Paris													10572.6	44.0537	5.29542	78.2064	0.744454	12.9604	300328	2198.86	265.38	3593.1	23.6379	368.156
27	Beijing	Kalibo
28	Beijing	Manila													2055.71	8.3166	0.606776	7.17079	0.130086	2.51999	22094.1	177.129	12.9731	142.311	2.6262	27.0841
29	Beijing	Helsinki
30	Beijing	Almaty
31	Beijing	Cheongju
32	Beijing	Jeju													2037.28	8.84566	0.937904	7.67274	0.126524	2.49739	11784.9	102.876	10.8741	81.7148	1.22775	14.4465
33	Beijing	Busan													2055.71	8.3166	0.606776	7.17079	0.130086	2.51999	10659.6	85.4582	6.25903	68.6599	1.26705	13.0671
34	Beijing	Daegu													1174.69	4.75234	0.346729	4.09759	0.0743349	1.43999	5710.2	45.7787	3.35287	36.7801	0.678739	6.99984
35	Beijing	Seoul													18091.8	53.7427	7.29228	94.3006	1.1052	22.1778	68633.2	426.763	57.4095	654.765	5.92672	84.1338
36	Beijing	Amsterdam
37	Beijing	Montreal													2366.09	12.8999	1.35154	21.5089	0.187714	2.90047	87015.2	728.72	76.3074	1145.08	6.8341	106.667
38	Beijing	Toronto
39	Beijing	Vancouver													5520.88	30.0998	3.1536	50.1875	0.438	6.76775	183774	1539.04	161.159	2418.38	14.4335	225.279
40	Beijing	Phnom Penh
41	Beijing	Siem Reap													587.346	2.78964	0.263843	1.53375	0.0328417	0.719997	6887.78	71.2425	6.82233	37.6301	0.703404	8.44337
42	Beijing	Prague
43	Beijing	Vientiane
44	Beijing	Male
45	Beijing	Kuala Lumpur
46	Beijing	Boston
47	Beijing	Chicago
48	Beijing	Dallas
49	Beijing	Los Angeles													16562.6	90.2994	9.4608	150.563	1.314	20.3033	583749	4888.68	511.914	7681.87	45.8471	715.587
50	Beijing	Houston													5520.88	30.0998	3.1536	50.1875	0.438	6.76775	236116	1977.39	207.061	3107.19	18.5444	289.443
51	Beijing	Honolulu													4330.03	11.9605	1.83585	24.0162	0.262675	5.30796	106498	618.569	95.1294	1091.17	8.40786	130.55
52	Beijing	New York													14274.3	47.2811	3.66752	85.0523	0.944036	17.4981	514671	2889.83	219.135	4917.76	35.1427	630.908
53	Beijing	Washington													3154.79	17.1999	1.80206	28.6786	0.250286	3.86729	126336	1058.02	110.79	1662.53	9.92233	154.869
54	Beijing	San Jose
55	Beijing	Seattle
56	Beijing	San Francisco													7964.73	17.1813	0.51392	34.8648	0.506036	9.76354	233123	954.285	28.5362	1821.8	15.827	285.774
57	Beijing	Ulan Bator													4111.42	16.6332	1.21355	14.3416	0.260172	5.03998	20176.2	161.753	11.8469	129.957	2.39823	24.733
58	Beijing	Dacca
59	Beijing	Rangoon													587.346	2.37617	0.173365	2.0488	0.0371674	0.719997	7150.06	57.322	4.19831	46.0543	0.849885	8.76488
60	Beijing	Naypyidaw
61	Beijing	Johannesburg
62	Beijing	Hiroshima													2936.73	11.8809	1.3944	6.40869	0.134487	3.59998	11040.8	88.5139	6.48283	71.1149	1.31235	13.5343
63	Beijing	Okinawa													1174.69	4.75234	0.346729	4.09759	0.0743349	1.43999	8498.78	68.1347	4.99024	54.7416	1.0102	10.4182
64	Beijing	Nagoya													2037.28	8.84566	0.937904	7.67274	0.126524	2.49739	14791.1	129.119	13.6479	102.559	1.54093	18.1316
65	Beijing	Osaka													7088.98	22.7996	3.07972	35.6916	0.432978	8.69001	43312.3	294.265	39.1193	395.366	3.78822	53.0943
66	Beijing	Tokyo													15342.1	50.6539	6.69539	75.7676	0.938254	18.8071	115895	812.526	104.929	856.024	10.3536	142.069
67	Beijing	Sendai													1174.69	4.75234	0.557762	2.56348	0.0537947	1.43999	7343.03	58.8691	4.31162	47.2973	0.872823	9.00144
68	Beijing	Sapporo													1455.2	6.31833	0.669931	5.48053	0.090374	1.78385	13736.8	119.915	12.6751	95.2489	1.43109	16.8392
69	Beijing	Stockholm													5051.71	13.954	2.14182	28.0189	0.306454	6.19262	102825	597.235	91.8485	1053.54	8.11788	126.048
70	Beijing	Geneva													3608.36	9.96711	1.52987	20.0135	0.218896	4.4233	88425.7	513.6	78.9863	906.002	6.98108	108.396
71	Beijing	Zurich
72	Beijing	Colombo
73	Beijing	Bangkok													6980.48	25.6483	2.28972	36.9276	0.4453	8.557	86327.3	612.538	54.6296	824.17	7.93015	105.824
74	Beijing	Chiang Mai													881.019	3.56426	0.260047	3.0732	0.0557511	1.08	9557.78	76.6248	5.61206	61.5628	1.13608	11.7164
75	Beijing	Phuket													2055.71	8.3166	0.606776	7.17079	0.130086	2.51999	29815.9	239.034	17.5071	192.048	3.54404	36.5497
76	Beijing	Istanbul
77	Beijing	Ashkhabad
78	Beijing	Tashkent
79	Beijing	Barcelona													5773.38	15.9474	2.06871	47.5648	0.573291	7.07728	91384.8	530.787	81.6296	936.321	7.2147	112.024
80	Beijing	Madrid													3608.36	9.96711	1.52987	20.0135	0.218896	4.4233	99211.5	576.247	88.6208	1016.51	7.83261	121.618
81	Beijing	Athens													2630.68	7.97369	1.2239	16.0108	0.175117	3.22481	40707	236.437	36.3616	417.081	3.21376	49.9006
82	Beijing	Singapore													8660.07	23.9211	3.67169	48.0323	0.52535	10.6159	123510	717.379	110.325	417.081	9.75093	151.404
83	Beijing	Budapest													5261.36	15.9474	2.44779	32.0216	0.350233	6.44962	70310.3	408.381	62.8047	720.393	5.55089	86.1896
84	Beijing	Teheran
85	Beijing	Tel Aviv
86	Beijing	Milan													5051.71	13.954	2.14182	28.0189	0.306454	6.19262	122155	709.507	109.115	1251.59	9.64394	149.743
87	Beijing	Rome													5051.71	13.954	2.14182	28.0189	0.306454	6.19262	122531	711.694	109.451	1255.44	9.67366	150.205
88	Beijing	New Delhi													2165.02	5.98026	0.917923	12.0081	0.131337	2.65398	27090.2	157.347	24.1983	277.563	2.13873	33.2084
89	Beijing	Bali
90	Beijing	Jakarta													1762.04	7.12851	0.836643	3.84521	0.0806921	2.15999	17721.8	142.076	10.4058	114.148	2.10649	21.7243
91	Beijing	London													5051.71	13.954	2.14182	28.0189	0.306454	6.19262	122441	711.169	109.37	1254.52	9.66653	150.094
92	Beijing	Da Nang
93	Beijing	Hanoi
94	Beijing	Ho Chi Minh City													1174.69	5.57929	0.527686	3.0675	0.0656833	1.43999	14667.6	151.712	14.5282	80.1338	1.49791	17.9803
95	Shanghai Pudong	Dubai	17928	38.5376	1.24275	102.125	1.15749	21.977	457770	1753.26	45.4389	5090.15	41.0627	561.156
96	Shanghai Pudong	Melbourne													2886.69	7.97369	1.2239	16.0108	0.175117	3.53864	69217.7	402.035	61.8288	709.198	5.46464	84.8503
97	Shanghai Pudong	Sydney													2165.02	5.98026	0.917923	12.0081	0.131337	2.65398	52005.8	302.063	46.4542	532.847	4.10578	63.7512
98	Shanghai Pudong	Saipan
99	Shanghai Pudong	Copenhagen
100	Shanghai Pudong	Frankfurt													5051.71	13.954	2.14182	28.0189	0.306454	6.19262	136381	792.139	121.823	1397.35	10.7671	167.183
101	Shanghai Pudong	Munich													2886.69	7.97369	1.2239	16.0108	0.175117	3.53864	77227.2	448.556	68.9832	791.263	6.09697	94.6687
102	Shanghai Pudong	Saint Petersburg
103	Shanghai Pudong	Moscow
104	Shanghai Pudong	Paris													3608.36	9.96711	1.52987	20.0135	0.218896	4.4233	99642.6	578.75	89.0058	1020.93	7.86663	122.147
105	Shanghai Pudong	Kalibo
106	Shanghai Pudong	Manila
107	Shanghai Pudong	Helsinki
108	Shanghai Pudong	Jeju
109	Shanghai Pudong	Busan
110	Shanghai Pudong	Daegu
111	Shanghai Pudong	Seoul
112	Shanghai Hongqiao	Seoul
113	Shanghai Pudong	Muan
114	Shanghai Pudong	Amsterdam
115	Shanghai Pudong	Toronto
116	Shanghai Pudong	Vancouver
117	Shanghai Pudong	Phnom Penh
118	Shanghai Pudong	Siem Reap
119	Shanghai Pudong	Male
120	Shanghai Pudong	Sabah
121	Shanghai Pudong	Kuala Lumpur
122	Shanghai Pudong	Anchorage
123	Shanghai Pudong	Atlanta
124	Shanghai Pudong	Boston
125	Shanghai Pudong	Chicago
126	Shanghai Pudong	Dallas
127	Shanghai Pudong	Los Angeles
128	Shanghai Pudong	Honolulu
129	Shanghai Pudong	New York
130	Shanghai Pudong	Seattle
131	Shanghai Pudong	San Francisco
132	Shanghai Pudong	Mexico City
133	Shanghai Pudong	Niigata
134	Shanghai Pudong	Fukuoka													4074.55	17.6913	1.87581	15.3455	0.253047	4.99478	17867.4	155.974	16.4865	123.89	1.86142	21.9028
135	Shanghai Pudong	Komatsu
136	Shanghai Pudong	Kagoshima
137	Shanghai Pudong	Saga
138	Shanghai Pudong	Hiroshima
139	Shanghai Pudong	Matsuyama
140	Shanghai Pudong	Okinawa
141	Shanghai Pudong	Okayama
142	Shanghai Pudong	Nagoya													2037.28	8.84566	0.937904	7.67274	0.126524	2.49739	11514.6	100.517	10.6247	79.8409	1.19959	14.1152
143	Shanghai Pudong	Nagasaki
144	Shanghai Pudong	Osaka													9144.69	31.1162	3.6865	42.8624	0.563064	11.21	41688.6	298.117	34.0014	348.612	4.01601	51.1038
145	Shanghai Hongqiao	Tokyo
146	Shanghai Pudong	Tokyo													9144.69	31.1162	3.6865	42.8624	0.563064	11.21	57704.6	408.182	47.5612	489.754	5.48591	70.737
147	Shanghai Pudong	Takamatsu
148	Shanghai Pudong	Sendai													587.346	2.37617	0.173365	2.0488	0.0371674	0.719997	4428.55	35.5037	2.60032	28.5248	0.526396	5.42873
149	Shanghai Pudong	Sapporo
150	Shanghai Pudong	Toyama
151	Shanghai Pudong	Ibaraki
152	Shanghai Pudong	Shizuoka
153	Shanghai Pudong	Zurich
154	Shanghai Pudong	Colombo
155	Shanghai Pudong	Bangkok
156	Shanghai Pudong	Chiang Mai
157	Shanghai Pudong	Phuket
158	Shanghai Pudong	Istanbul
159	Shanghai Pudong	Seri Begawan
160	Shanghai Pudong	Singapore
161	Shanghai Pudong	Auckland
162	Shanghai Pudong	Teheran
163	Shanghai Pudong	Malpensa													5051.71	13.954	2.14182	28.0189	0.306454	6.19262	137267	797.282	122.614	1406.42	10.837	168.268
164	Shanghai Pudong	Rome
165	Shanghai Pudong	Mumbai	291.039	1.26367	0.133986	1.09611	0.0180748	0.35677	5089.08	44.4251	4.69576	35.287	0.530179	6.23844	2328.31	10.1093	1.05537	6.135	0.131367	2.85416	23183.5	202.38	21.3917	160.751	2.41525	28.4195
166	Shanghai Pudong	New Delhi
167	Shanghai Pudong	Bali
168	Shanghai Pudong	Jakarta
169	Shanghai Pudong	London
170	Shanghai Pudong	Da Nang
171	Shanghai Pudong	Hanoi
172	Shanghai Pudong	Ho Chi Minh City
173	Shanghai Pudong	Nha Trang
174	Guangzhou	Dubai	5520.88	30.0998	3.1536	50.1875	0.438	6.76775	132792	1112.08	116.451	1747.48	10.4294	162.783
175	Guangzhou	Cairo																																					3943.48	21.4999	2.25257	35.8482	0.312857	4.83411	127560	1068.27	111.863	1678.64	10.0185
176	Guangzhou	Brisbane
177	Guangzhou	Melbourne
178	Guangzhou	Perth
179	Guangzhou	Saipan
180	Guangzhou	Frankfurt
181	Guangzhou	Moscow
182	Guangzhou	Paris
183	Guangzhou	Manila
184	Guangzhou	Busan
185	Guangzhou	Seoul
186	Guangzhou	Amsterdam
187	Guangzhou	Vancouver
188	Guangzhou	Phnom Penh
189	Guangzhou	Siem Reap
190	Guangzhou	Nairobi
191	Guangzhou	Vientiane
192	Guangzhou	Male
193	Guangzhou	Sabah
194	Guangzhou	Kuala Lumpur
195	Guangzhou	Penang
196	Guangzhou	Los Angeles
197	Guangzhou	New York
198	Guangzhou	San Francisco
199	Guangzhou	Dacca
200	Guangzhou	Rangoon
201	Guangzhou	Katmandu
202	Guangzhou	Nagoya
203	Guangzhou	Osaka
204	Guangzhou	Tokyo
205	Guangzhou	Colombo
206	Guangzhou	Bangkok
207	Guangzhou	Chiang Mai
208	Guangzhou	Krabi
209	Guangzhou	Phuket
210	Guangzhou	Istanbul
211	Guangzhou	Singapore
212	Guangzhou	Auckland
213	Guangzhou	Teheran
214	Guangzhou	New Delhi
215	Guangzhou	Bali
216	Guangzhou	Jakarta
217	Guangzhou	London
218	Guangzhou	Da Nang
219	Guangzhou	Hanoi
220	Guangzhou	Ho Chi Minh City
221	Changchun	Jeju
222	Changchun	Seoul
223	Changchun	Tokyo
224	Changchun	Nagoya
225	Changsha	Frankfurt
226	Changsha	Jeju
227	Changsha	Seoul
228	Changsha	Bangkok
229	Changsha	Phuket
230	Chengdu	Melbourne
231	Chengdu	Karachi													582.079	2.52733	0.267973	2.19221	0.0361496	0.71354	8234.2	71.8804	7.59779	57.0948	0.857836	10.0939
232	Chengdu	Frankfurt													3608.36	9.96711	1.52987	20.0135	0.218896	4.4233	88505.1	514.061	79.0572	906.815	6.98735	108.494
233	Chengdu	Seoul													2910.39	12.6367	3.42266	24.1056	0.353737	3.5677	14356.3	125.323	13.2467	99.5446	1.49563	17.5986
234	Chengdu	Siem Reap
235	Chengdu	Male
236	Chengdu	Katmandu
237	Chengdu	Krabi
238	Chengdu	Bangkok
239	Chengdu	Phuket
240	Chengdu	Chiang Mai
241	Chengdu	Surat Thani
242	Chengdu	Singapore													2037.28	8.84566	0.937904	7.67274	0.126524	2.49739	25560.8	223.132	23.5852	177.235	2.66291	31.3336
243	Chengdu	Mumbai													1164.16	5.05466	0.535945	4.38442	0.0722992	1.42708	15121.4	132.002	13.9527	104.85	1.57534	18.5365
244	Dalian	Jeju
245	Dalian	Seoul
246	Dalian	Osaka													1468.37	5.94043	0.433411	5.12199	0.0929186	1.79999	8139.76	65.2565	4.77944	52.4291	0.967526	9.97811
247	Dalian	Tokyo													1174.69	4.75234	0.346729	4.09759	0.0743349	1.43999	7704.03	61.7632	4.52359	49.6225	0.915733	9.44396
248	Dalian	Fukuoka.													2055.71	8.3166	0.606776	7.17079	0.130086	2.51999	9731.91	78.0207	5.7143	62.6843	1.15677	11.9298
249	Dalian	Toyama
250	Dalian	Hiroshima													1468.37	5.94043	0.433411	5.12199	0.0929186	1.79999	7007.87	56.1821	4.11482	45.1385	0.832984	8.59057
251	Dalian	Nagoya
252	Fuzhou	Jeju
253	Fuzhou	Siem Reap
254	Fuzhou	Kuala Lumpur
255	Fuzhou	Osaka													873.118	3.791	0.401959	3.28832	0.0542244	1.07031	6355.29	55.4784	5.8641	44.0667	0.662091	7.79061
256	Fuzhou	Bangkok
257	Fuzhou	Singapore
258	Fuzhou	Jakarta
259	Guiyang	Phuket
260	Guiyang	Bangkok
261	Guilin	Seoul
262	Harbin	Osaka
263	Harbin	Niigata
264	Harbin	Nagoya
265	Haikou	Singapore
266	Haikou	Bangkok
267	Hailar	Chita													1174.69	5.57929	0.527686	3.0675	0.0656833	1.43999	2887.68	29.8682	2.86024	15.7763	0.2949	3.53986
268	Hangzhou	Jeju													1746.24	7.58199	0.803918	6.57663	0.108449	2.14062	6950.31	60.6727	6.41313	48.1925	0.72408	8.52002
269	Hangzhou	Cheongju
270	Hangzhou	Seoul													2037.28	8.84566	0.937904	7.67274	0.126524	2.49739	9535.24	83.2378	8.79828	66.116	0.993378	11.6888
271	Hangzhou	Okinawa
272	Hangzhou	Bangkok
273	Hangzhou	Phuket
274	Hangzhou	Da Nang
275	Hefei	Seoul													1746.24	7.58199	0.803918	6.57663	0.108449	2.14062	9316.85	81.3313	8.59676	64.6017	0.970626	11.421
276	Jinan	Osaka
277	Jinan	Bangkok
278	Jinan	Seoul
279	Kiamusze	Seoul
280	Jieyang	Bangkok
281	Kunming	Dubai
282	Kunming	Paris
283	Kunming	Seoul
284	Kunming	Siem Reap
285	Kunming	Vientiane
286	Kunming	Dacca
287	Kunming	Mandalay
288	Kunming	Naypyidaw
289	Kunming	Rangoon													2037.28	8.84566	0.937904	7.67274	0.126524	2.49739	8884.08	77.5535	8.19744	61.6009	0.925539	10.8905
290	Kunming	Colombo
291	Kunming	Krabi
292	Kunming	Bangkok
293	Kunming	Phuket.
294	Kunming	Chiang Rai
295	Kunming	Chiang Mai
296	Kunming	Koh Samui
297	Kunming	Singapore
298	Kunming	Calcutta
299	Kunming	Hanoi
300	Kunming	Da Nang
301	Kunming	Katmandu
302	Lhasa	Katmandu													873.118	3.791	0.401959	3.28832	0.0542244	1.07031	2444.31	21.3375	2.25539	16.9485	0.254647	2.99635
303	Lanzhou	Bangkok
304	Manchuria	Irkutsk
305	Mudanjiang	Seoul
306	Nanchang	Bangkok
307	Nanjing	Sydney
308	Nanjing	Jeju
309	Nanjing	Seoul
310	Nanjing	Busan
311	Nanjing	Osaka
312	Nanjing	Tokyo
313	Nanjing	Phuket
314	Nanning	Seoul
315	Nanning	Phnom Penh
316	Nanning	Vientiane
317	Nanning	Rangoon
318	Nanning	Chiang Mai
319	Nanning	Bangkok
320	Nanning	Singapore
321	Nanning	Hanoi
322	Ningbo	Daegu
323	Ningbo	Jeju
324	Ningbo	Cheongju
325	Ningbo	Bangkok
326	Qingdao	Seoul													4074.55	17.6913	1.87581	15.3455	0.253047	4.99478	11924.7	104.097	11.0031	82.6842	1.24231	14.6179
327	Qingdao	Busan
328	Qingdao	Osaka
329	Qingdao	Tokyo
330	Qingdao	Fukuoka
331	Qingdao	Nagoya
332	Qingdao	Bangkok
333	Shenzhen	Jeju
334	Shenzhen	Seoul
335	Shenzhen	Sabah
336	Shenzhen	Mauritius
337	Shenzhen	Tokyo													9207.38	27.9079	4.28364	56.0377	0.612908	11.2868	47523.9	276.032	42.4508	486.926	3.75195	58.2571
338	Shenzhen	Osaka
339	Shenzhen	Bangkok
340	Shenzhen	Phuket
341	Shenzhen	Singapore
342	Shenzhen	Bali
343	Shenyang	Busan
344	Shenyang	Jeju
345	Shenyang	Cheongju
346	Shenyang	Seoul
347	Shenyang	Vancouver
348	Shenyang	Osaka
349	Shenyang	Tokyo
350	Shenyang	Nagoya
351	Shijiazhuang	Seoul
352	Shijiazhuang	Busan
353	Taiyuan	Seoul
354	Taiyuan	Bangkok
355	Tianjin	Jeju
356	Tianjin	Seoul													4111.42	16.6332	1.21355	14.3416	0.260172	5.03998	16167.8	129.618	9.49329	104.139	1.92178	19.8193
357	Tianjin	Okinawa
358	Tianjin	Osaka													1468.37	5.94043	0.433411	5.12199	0.0929186	1.79999	9612.81	77.0659	5.64437	61.9172	1.14262	11.7838
359	Tianjin	Hakodate
360	Tianjin	Shizuoka
361	Tianjin	Tokyo													1174.69	4.75234	0.346729	4.09759	0.0743349	1.43999	9832.03	78.8234	5.77309	63.3292	1.16868	12.0526
362	Tianjin	Nagoya
363	Tianjin	Sapporo
364	Tianjin	Bangkok
365	Weihai	Seoul
366	Wenzhou	Jeju
367	Wenzhou	Rome
368	Urumqi	Dubai
369	Urumqi	Islamabad
370	Urumqi	Moscow
371	Urumqi	Novosibirsk
372	Urumqi	Tbilisi
373	Urumqi	Almaty
374	Urumqi	Seoul
375	Urumqi	Osh
376	Urumqi	Bishkek
377	Urumqi	Dushanbe
378	Urumqi	Khujand
379	Urumqi	Istanbul
380	Urumqi	Ashkhabad
381	Urumqi	Tashkent
382	Urumqi	Teheran
383	Wuxi	Osaka
384	Wuxi	Bangkok
385	Wuxi	Singapore
386	Wuhan	Moscow
387	Wuhan	Jeju
388	Wuhan	Seoul
389	Wuhan	Kuala Lumpur
390	Wuhan	Osaka
391	Wuhan	Krabi
392	Wuhan	Bangkok
393	Wuhan	Phuket
394	Wuhan	Chiang Mai													582.079	2.52733	0.267973	2.19221	0.0361496	0.71354	4725.01	41.247	4.35982	32.7626	0.49225	5.79214
395	Wuhan	Singapore
396	Xi'an	Moscow
397	Xi'an	Paris
398	Xi'an	Jeju
399	Xi'an	Seoul
400	Xi'an	Tokyo
401	Xi'an	Nagoya
402	Xi'an	Krabi
403	Xi'an	Bangkok
404	Xi'an	Phuket
405	Xiamen	Manila
406	Xiamen	Jeju
407	Xiamen	Seoul
408	Xiamen	Siem Reap
409	Xiamen	Kuala Lumpur
410	Xiamen	Bangkok
411	Xiamen	Singapore
412	Xiamen	Jakarta													881.019	3.56426	0.260047	3.0732	0.0557511	1.08	11609.6	93.0742	6.81683	74.7788	1.37997	14.2316
413	Yantai	Seoul
414	Yantai	Osaka
415	Yanji	Vladivostok
416	Yanji	Busan
417	Yanji	Cheongju
418	Yanji	Seoul													2055.71	8.3166	0.606776	7.17079	0.130086	2.51999	6055.62	48.5479	3.55569	39.005	0.719797	7.42327
419	Yancheng	Seoul
420	Zhangjiajie	Daegu
421	Zhangjiajie	Busan
422	Zhangjiajie	Cheongju
423	Zhengzhou	Leipzig
424	Zhengzhou	Jeju
425	Zhengzhou	Seoul
426	Zhengzhou	Krabi
427	Zhengzhou	Bangkok
428	Zhengzhou	Phuket
429	Chongqing	Sydney
430	Chongqing	Seoul													2055.71	8.3166	0.606776	7.17079	0.130086	2.51999	16130.2	129.316	9.47118	103.896	1.9173	19.7731
431	Chongqing	Phnom Penh
432	Chongqing	Siem Reap
433	Chongqing	Osaka
434	Chongqing	Phuket
435	Chongqing	Chiang Mai
436	Chongqing	Bangkok
[truncated: 1,081 more columns]
