# Supplementary material for: Impacts of the proposal of the CNG2020 strategy on aircraft emissions of China–foreign routes
Source: Copernicus journal article supplement (doi:10.5194/essd-14-4419-2022), 2022-09-27
Supplement: Supplementary file 2 [file essd-14-4419-2022-supplement.zip › Supplementary Tables/Supplementary Table S5.xlsx]

## Sheet: S4-2017 emissions(tons)
No.	Chinese cities/airports	Foreign cities	AirAsia												All Nippon Airways												China Eastern Airlines												Air China
			LTO						CCD						LTO						CCD						LTO						CCD						LTO						CCD
			CO2	CO	HC	NOx	PM2.5	SO2	CO2	CO	HC	NOx	PM2.5	SO2	CO2	CO	HC	NOx	PM2.5	SO2	CO2	CO	HC	NOx	PM2.5	SO2	CO2	CO	HC	NOx	PM2.5	SO2	CO2	CO	HC	NOx	PM2.5	SO2	CO2	CO	HC	NOx	PM2.5	SO2	CO2	CO	HC	NOx	PM2.5
1	Beijing	Dubai	0	0	0	0	0	0	0	0	0	0	0	0	0	0	0	0	0	0	0	0	0	0	0	0	0	0	0	0	0	0	0	0	0	0	0	0	3608.36	9.96711	1.52987	20.0135	0.218896	4.4233	66685.7	387.328	59.567	683.256	5.26474
2	Beijing	Baku	0	0	0	0	0	0	0	0	0	0	0	0	0	0	0	0	0	0	0	0	0	0	0	0	0	0	0	0	0	0	0	0	0	0	0	0	0	0	0	0	0	0	0	0	0	0	0
3	Beijing	Cairo	0	0	0	0	0	0	0	0	0	0	0	0	0	0	0	0	0	0	0	0	0	0	0	0	0	0	0	0	0	0	0	0	0	0	0	0	0	0	0	0	0	0	0	0	0	0	0
4	Beijing	Vienna	0	0	0	0	0	0	0	0	0	0	0	0	0	0	0	0	0	0	0	0	0	0	0	0	0	0	0	0	0	0	0	0	0	0	0	0	2886.69	7.97369	1.2239	16.0108	0.175117	3.53864	68050	395.253	60.7857	697.235	5.37245
5	Beijing	Melbourne	0	0	0	0	0	0	0	0	0	0	0	0	0	0	0	0	0	0	0	0	0	0	0	0	0	0	0	0	0	0	0	0	0	0	0	0	1973.01	5.98026	0.917923	12.0081	0.131337	2.41861	60571.2	351.813	54.1052	620.607	4.782
6	Beijing	Sydney	0	0	0	0	0	0	0	0	0	0	0	0	0	0	0	0	0	0	0	0	0	0	0	0	9207.38	27.9079	4.28364	56.0377	0.612908	11.2868	150086	869.828	133.77	1534.4	11.8231	183.982	5051.71	13.954	2.14182	28.0189	0.306454	6.19262	135938	789.566	121.427	1392.81	10.7321
7	Beijing	Lahore	0	0	0	0	0	0	0	0	0	0	0	0	0	0	0	0	0	0	0	0	0	0	0	0	0	0	0	0	0	0	0	0	0	0	0	0	0	0	0	0	0	0	0	0	0	0	0
8	Beijing	Karachi	0	0	0	0	0	0	0	0	0	0	0	0	0	0	0	0	0	0	0	0	0	0	0	0	0	0	0	0	0	0	0	0	0	0	0	0	2886.69	7.97369	1.2239	16.0108	0.175117	3.53864	47463.7	275.682	42.397	486.309	3.74719
9	Beijing	Islamabad	0	0	0	0	0	0	0	0	0	0	0	0	0	0	0	0	0	0	0	0	0	0	0	0	0	0	0	0	0	0	0	0	0	0	0	0	2630.68	7.97369	1.2239	16.0108	0.175117	3.22481	37305.1	216.678	33.3228	382.225	2.94519
10	Beijing	Saint Paul	0	0	0	0	0	0	0	0	0	0	0	0	0	0	0	0	0	0	0	0	0	0	0	0	0	0	0	0	0	0	0	0	0	0	0	0	2227.7	3.54513	0.114005	14.0554	0.142663	2.73082	71396.7	317.882	7.83678	1249.58	8.17363
11	Beijing	Minsk	0	0	0	0	0	0	0	0	0	0	0	0	0	0	0	0	0	0	0	0	0	0	0	0	0	0	0	0	0	0	0	0	0	0	0	0	2630.68	7.97369	1.2239	16.0108	0.175117	3.22481	60332.4	350.427	53.892	618.161	4.76316
12	Beijing	Saipan	0	0	0	0	0	0	0	0	0	0	0	0	0	0	0	0	0	0	0	0	0	0	0	0	2165.02	5.98026	0.917923	12.0081	0.131337	2.65398	27280.6	158.453	24.3685	279.515	2.15377	33.4419	0	0	0	0	0	0	0	0	0	0	0
13	Beijing	Brussels	0	0	0	0	0	0	0	0	0	0	0	0	0	0	0	0	0	0	0	0	0	0	0	0	0	0	0	0	0	0	0	0	0	0	0	0	0	0	0	0	0	0	0	0	0	0	0
14	Beijing	Warsaw	0	0	0	0	0	0	0	0	0	0	0	0	0	0	0	0	0	0	0	0	0	0	0	0	0	0	0	0	0	0	0	0	0	0	0	0	2630.68	7.97369	1.2239	16.0108	0.175117	3.22481	64916.5	377.052	57.9867	665.129	5.12506
15	Beijing	Pyongyang	0	0	0	0	0	0	0	0	0	0	0	0	0	0	0	0	0	0	0	0	0	0	0	0	0	0	0	0	0	0	0	0	0	0	0	0	1070.97	2.78964	0.263843	1.53375	0.0328417	1.31285	2927.52	30.2802	1.8858	15.9939	0.247113
16	Beijing	Copenhagen	0	0	0	0	0	0	0	0	0	0	0	0	0	0	0	0	0	0	0	0	0	0	0	0	0	0	0	0	0	0	0	0	0	0	0	0	0	0	0	0	0	0	0	0	0	0	0
17	Beijing	Dusseldorf	0	0	0	0	0	0	0	0	0	0	0	0	0	0	0	0	0	0	0	0	0	0	0	0	0	0	0	0	0	0	0	0	0	0	0	0	1973.01	5.98026	0.917923	12.0081	0.131337	2.41861	51946.5	301.719	46.4013	532.24	4.1011
18	Beijing	Frankfurt	0	0	0	0	0	0	0	0	0	0	0	0	0	0	0	0	0	0	0	0	0	0	0	0	0	0	0	0	0	0	0	0	0	0	0	0	11041.8	60.1996	6.3072	100.375	0.876	13.5355	356145	2982.58	312.319	4686.7	28.6837
19	Beijing	Munich	0	0	0	0	0	0	0	0	0	0	0	0	0	0	0	0	0	0	0	0	0	0	0	0	0	0	0	0	0	0	0	0	0	0	0	0	4603.69	13.954	2.14182	28.0189	0.306454	5.64342	119720	695.366	106.94	1226.64	9.45172
20	Beijing	Saint Petersburg	0	0	0	0	0	0	0	0	0	0	0	0	0	0	0	0	0	0	0	0	0	0	0	0	0	0	0	0	0	0	0	0	0	0	0	0	0	0	0	0	0	0	0	0	0	0	0
21	Beijing	Irkutsk	0	0	0	0	0	0	0	0	0	0	0	0	0	0	0	0	0	0	0	0	0	0	0	0	0	0	0	0	0	0	0	0	0	0	0	0	0	0	0	0	0	0	0	0	0	0	0
22	Beijing	Novosibirsk	0	0	0	0	0	0	0	0	0	0	0	0	0	0	0	0	0	0	0	0	0	0	0	0	0	0	0	0	0	0	0	0	0	0	0	0	0	0	0	0	0	0	0	0	0	0	0
23	Beijing	Moscow	0	0	0	0	0	0	0	0	0	0	0	0	0	0	0	0	0	0	0	0	0	0	0	0	0	0	0	0	0	0	0	0	0	0	0	0	4924.77	17.3317	1.68294	29.7568	0.315214	6.03701	106178	712.364	69.2235	1151.95	9.68357
24	Beijing	Vladivostok	0	0	0	0	0	0	0	0	0	0	0	0	0	0	0	0	0	0	0	0	0	0	0	0	0	0	0	0	0	0	0	0	0	0	0	0	0	0	0	0	0	0	0	0	0	0	0
25	Beijing	Paris	0	0	0	0	0	0	0	0	0	0	0	0	0	0	0	0	0	0	0	0	0	0	0	0	0	0	0	0	0	0	0	0	0	0	0	0	10124.6	44.0537	5.29542	78.2064	0.744454	12.4112	302288	2215.85	267.096	3632.71	24.2518
26	Beijing	Kalibo	0	0	0	0	0	0	0	0	0	0	0	0	0	0	0	0	0	0	0	0	0	0	0	0	0	0	0	0	0	0	0	0	0	0	0	0	0	0	0	0	0	0	0	0	0	0	0
27	Beijing	Manila	0	0	0	0	0	0	0	0	0	0	0	0	0	0	0	0	0	0	0	0	0	0	0	0	0	0	0	0	0	0	0	0	0	0	0	0	2055.71	8.3166	0.606776	7.17079	0.130086	2.51999	22731.5	182.239	13.3473	146.416	2.32142
28	Beijing	Helsinki	0	0	0	0	0	0	0	0	0	0	0	0	0	0	0	0	0	0	0	0	0	0	0	0	0	0	0	0	0	0	0	0	0	0	0	0	0	0	0	0	0	0	0	0	0	0	0
29	Beijing	Tbilisi	0	0	0	0	0	0	0	0	0	0	0	0	0	0	0	0	0	0	0	0	0	0	0	0	0	0	0	0	0	0	0	0	0	0	0	0	0	0	0	0	0.0743349	0	0	0	0	0	1.42605
30	Beijing	Havana	0	0	0	0	0	0	0	0	0	0	0	0	0	0	0	0	0	0	0	0	0	0	0	0	0	0	0	0	0	0	0	0	0	0	0	0	788.697	4.29997	0.450514	7.16964	0.0625714	0.966822	39758.4	332.961	34.8658	523.202	3.20212
31	Beijing	Almaty	0	0	0	0	0	0	0	0	0	0	0	0	0	0	0	0	0	0	0	0	0	0	0	0	0	0	0	0	0	0	0	0	0	0	0	0	0	0	0	0	0	0	0	0	0	0	0
32	Beijing	Cheongju	0	0	0	0	0	0	0	0	0	0	0	0	0	0	0	0	0	0	0	0	0	0	0	0	0	0	0	0	0	0	0	0	0	0	0	0	0	0	0	0	0	0	0	0	0	0	0
33	Beijing	Jeju	0	0	0	0	0	0	0	0	0	0	0	0	0	0	0	0	0	0	0	0	0	0	0	0	0	0	0	0	0	0	0	0	0	0	0	0	0	0	0	0	0	0	0	0	0	0	0
34	Beijing	Busan	0	0	0	0	0	0	0	0	0	0	0	0	0	0	0	0	0	0	0	0	0	0	0	0	0	0	0	0	0	0	0	0	0	0	0	0	2055.71	8.3166	0.606776	7.17079	0.130086	2.51999	10882.9	87.2481	6.39012	70.0979	1.1114
35	Beijing	Daegu	0	0	0	0	0	0	0	0	0	0	0	0	0	0	0	0	0	0	0	0	0	0	0	0	0	0	0	0	0	0	0	0	0	0	0	0	0	0	0	0	0	0	0	0	0	0	0
36	Beijing	Seoul	0	0	0	0	0	0	0	0	0	0	0	0	0	0	0	0	0	0	0	0	0	0	0	0	0	0	0	0	0	0	0	0	0	0	0	0	13237.7	48.2785	5.23118	57.7059	0.819673	16.2274	53160.8	403.556	42.6046	414.096	5.08848
37	Beijing	Amsterdam	0	0	0	0	0	0	0	0	0	0	0	0	0	0	0	0	0	0	0	0	0	0	0	0	0	0	0	0	0	0	0	0	0	0	0	0	4623.05	13.954	2.14182	28.0189	0.306454	5.66715	116073	674.183	103.682	1189.28	9.1638
38	Beijing	Montreal	0	0	0	0	0	0	0	0	0	0	0	0	0	0	0	0	0	0	0	0	0	0	0	0	0	0	0	0	0	0	0	0	0	0	0	0	3943.48	21.4999	2.25257	35.8482	0.312857	4.83411	145909	1221.93	127.954	1920.1	11.7514
39	Beijing	Toronto	0	0	0	0	0	0	0	0	0	0	0	0	0	0	0	0	0	0	0	0	0	0	0	0	0	0	0	0	0	0	0	0	0	0	0	0	0	0	0	0	0	0	0	0	0	0	0
40	Beijing	Vancouver	0	0	0	0	0	0	0	0	0	0	0	0	0	0	0	0	0	0	0	0	0	0	0	0	0	0	0	0	0	0	0	0	0	0	0	0	10572.6	44.0537	5.29542	78.2064	0.744454	12.9604	315033	2307.24	278.369	3769.86	25.1674
41	Beijing	Calgary	0	0	0	0	0	0	0	0	0	0	0	0	0	0	0	0	0	0	0	0	0	0	0	0	0	0	0	0	0	0	0	0	0	0	0	0	0	0	0	0	0	0	0	0	0	0	0
42	Beijing	Phnom Penh	0	0	0	0	0	0	0	0	0	0	0	0	0	0	0	0	0	0	0	0	0	0	0	0	0	0	0	0	0	0	0	0	0	0	0	0	0	0	0	0	0	0	0	0	0	0	0
43	Beijing	Siem Reap	0	0	0	0	0	0	0	0	0	0	0	0	0	0	0	0	0	0	0	0	0	0	0	0	0	0	0	0	0	0	0	0	0	0	0	0	0	0	0	0	0	0	0	0	0	0	0
44	Beijing	Prague	0	0	0	0	0	0	0	0	0	0	0	0	0	0	0	0	0	0	0	0	0	0	0	0	0	0	0	0	0	0	0	0	0	0	0	0	0	0	0	0	0	0	0	0	0	0	0
45	Beijing	Vientiane	0	0	0	0	0	0	0	0	0	0	0	0	0	0	0	0	0	0	0	0	0	0	0	0	2936.73	11.8809	0.866823	10.244	0.185837	3.59999	17901.5	143.517	10.5113	115.306	1.82817	21.9445	0	0	0	0	0	0	0	0	0	0	0
46	Beijing	Male	0	0	0	0	0	0	0	0	0	0	0	0	0	0	0	0	0	0	0	0	0	0	0	0	0	0	0	0	0	0	0	0	0	0	0	0	0	0	0	0	0	0	0	0	0	0	0
47	Beijing	Kuala Lumpur	0	0	0	0	0	0	0	0	0	0	0	0	0	0	0	0	0	0	0	0	0	0	0	0	10103.4	27.9079	4.28364	56.0377	0.612908	12.3852	142445	827.357	127.239	1459.48	11.2458	174.616	2165.02	5.98026	0.917923	12.0081	0.131337	2.65398	30523.9	177.291	27.2655	312.745	2.40982
48	Beijing	Boston	0	0	0	0	0	0	0	0	0	0	0	0	0	0	0	0	0	0	0	0	0	0	0	0	0	0	0	0	0	0	0	0	0	0	0	0	0	0	0	0	0	0	0	0	0	0	0
49	Beijing	Chicago	0	0	0	0	0	0	0	0	0	0	0	0	0	0	0	0	0	0	0	0	0	0	0	0	0	0	0	0	0	0	0	0	0	0	0	0	0	0	0	0	0	0	0	0	0	0	0
50	Beijing	Dallas	0	0	0	0	0	0	0	0	0	0	0	0	0	0	0	0	0	0	0	0	0	0	0	0	0	0	0	0	0	0	0	0	0	0	0	0	800.292	1.67737	0.0993009	6.05783	0.0511417	0.981036	26821.1	108.125	6.43807	364.809	2.16016
51	Beijing	Las Vegas	0	0	0	0	0	0	0	0	0	0	0	0	0	0	0	0	0	0	0	0	0	0	0	0	0	0	0	0	0	0	0	0	0	0	0	0	0	0	0	0	0	0	0	0	0	0	0
52	Beijing	Los Angeles	0	0	0	0	0	0	0	0	0	0	0	0	0	0	0	0	0	0	0	0	0	0	0	0	0	0	0	0	0	0	0	0	0	0	0	0	14940.2	66.4036	6.50671	124.972	1.12566	18.3144	524754	3872.1	358.599	7484.01	46.7851
53	Beijing	Houston	0	0	0	0	0	0	0	0	0	0	0	0	0	0	0	0	0	0	0	0	0	0	0	0	0	0	0	0	0	0	0	0	0	0	0	0	3943.48	21.4999	2.25257	35.8482	0.312857	4.83411	165373	1384.94	145.023	2176.24	13.3191
54	Beijing	Honolulu	0	0	0	0	0	0	0	0	0	0	0	0	0	0	0	0	0	0	0	0	0	0	0	0	0	0	0	0	0	0	0	0	0	0	0	0	1973.01	5.98026	0.917923	12.0081	0.131337	2.41861	53152.2	308.722	47.4783	550.279	4.2401
55	Beijing	New York	0	0	0	0	0	0	0	0	0	0	0	0	0	0	0	0	0	0	0	0	0	0	0	0	0	0	0	0	0	0	0	0	0	0	0	0	17429.1	68.7809	5.92009	120.901	1.25689	21.3654	643954	4255.19	364.199	7053.8	48.5025
56	Beijing	Washington	0	0	0	0	0	0	0	0	0	0	0	0	0	0	0	0	0	0	0	0	0	0	0	0	0	0	0	0	0	0	0	0	0	0	0	0	5520.88	30.0998	3.1536	50.1875	0.438	6.76775	226311	1895.27	198.462	2978.15	18.227
57	Beijing	San Jose	0	0	0	0	0	0	0	0	0	0	0	0	0	0	0	0	0	0	0	0	0	0	0	0	0	0	0	0	0	0	0	0	0	0	0	0	0	0	0	0	0	0	0	0	0	0	0
58	Beijing	Seattle	0	0	0	0	0	0	0	0	0	0	0	0	0	0	0	0	0	0	0	0	0	0	0	0	0	0	0	0	0	0	0	0	0	0	0	0	0	0	0	0	0	0	0	0	0	0	0
59	Beijing	San Francisco	0	0	0	0	0	0	0	0	0	0	0	0	0	0	0	0	0	0	0	0	0	0	0	0	0	0	0	0	0	0	0	0	0	0	0	0	7964.73	17.1813	0.51392	34.8648	0.506036	9.76354	245496	1004.93	30.0507	1918.49	16.667
60	Beijing	Ulan Bator	0	0	0	0	0	0	0	0	0	0	0	0	0	0	0	0	0	0	0	0	0	0	0	0	0	0	0	0	0	0	0	0	0	0	0	0	2349.39	9.50468	0.693458	8.19519	0.14867	2.87999	11770.7	94.3661	6.91145	75.8167	1.20207
61	Beijing	Dacca	0	0	0	0	0	0	0	0	0	0	0	0	0	0	0	0	0	0	0	0	0	0	0	0	4111.42	16.6332	1.21355	14.3416	0.260172	5.03998	28625.7	229.492	16.8082	184.381	2.92335	35.0907	0	0	0	0	0	0	0	0	0	0	0
62	Beijing	Rangoon	0	0	0	0	0	0	0	0	0	0	0	0	0	0	0	0	0	0	0	0	0	0	0	0	0	0	0	0	0	0	0	0	0	0	0	0	1174.69	4.75234	0.346729	4.09759	0.0743349	1.43999	14387.7	115.346	8.44805	92.6729	1.46932
63	Beijing	Naypyidaw	0	0	0	0	0	0	0	0	0	0	0	0	0	0	0	0	0	0	0	0	0	0	0	0	587.346	2.37617	0.173365	2.0488	0.0371674	0.719997	7058.75	56.59	4.1447	45.4662	0.720864	8.65295	0	0	0	0	0	0	0	0	0	0	0
64	Beijing	Johannesburg	0	0	0	0	0	0	0	0	0	0	0	0	0	0	0	0	0	0	0	0	0	0	0	0	0	0	0	0	0	0	0	0	0	0	0	0	2366.09	12.8999	1.35154	21.5089	0.187714	2.90047	99385.4	832.315	87.1553	1307.87	8.00445
65	Beijing	Hiroshima	0	0	0	0	0	0	0	0	0	0	0	0	0	0	0	0	0	0	0	0	0	0	0	0	0	0	0	0	0	0	0	0	0	0	0	0	2936.73	11.8809	0.866823	10.244	0.185837	3.59999	11176.6	89.6029	6.56259	71.9898	1.14139
66	Beijing	Okinawa	0	0	0	0	0	0	0	0	0	0	0	0	0	0	0	0	0	0	0	0	0	0	0	0	0	0	0	0	0	0	0	0	0	0	0	0	1174.69	4.75234	0.346729	4.09759	0.0743349	1.43999	8573.07	68.7303	5.03386	55.2201	0.875511
67	Beijing	Nagoya	0	0	0	0	0	0	0	0	0	0	0	0	0	0	0	0	0	0	0	0	0	0	0	0	2037.28	8.84566	0.937904	7.67274	0.126524	2.49739	16491	143.958	15.2164	114.346	1.71802	20.2154	2055.71	8.3166	0.606776	7.17079	0.130086	2.51999	15181.3	121.708	8.91402	97.7844	1.55037
68	Beijing	Osaka	0	0	0	0	0	0	0	0	0	0	0	0	3907.8	14.1663	2.42494	18.0959	0.252362	4.79037	25670.4	179.718	30.9521	211.539	2.31973	31.468	2910.39	12.6367	1.33986	10.9611	0.180748	3.5677	23403.8	204.304	21.595	162.279	2.4382	28.6895	6640.96	22.7996	3.07972	35.6916	0.432978	8.14081	46764.4	319.117	42.2513	438.271	4.20223
69	Beijing	Tokyo	0	0	0	0	0	0	0	0	0	0	0	0	10021.5	29.2584	3.53327	49.1436	0.6238	12.2848	72286	462.92	51.4045	833.703	6.38684	88.6116	4074.55	17.6913	1.87581	72.2709	0.253047	4.99478	26173.9	228.485	24.1509	181.486	2.72679	32.0852	16215.2	54.4449	7.09735	79.0559	0.992479	19.8774	123993	873.706	112.305	1096.36	11.1151
70	Beijing	Sendai	0	0	0	0	0	0	0	0	0	0	0	0	0	0	0	0	0	0	0	0	0	0	0	0	0	0	0	0	0	0	0	0	0	0	0	0	1174.69	4.75234	0.346729	4.09759	0.0743349	1.43999	7442.79	59.6688	4.37019	47.9398	0.760083
71	Beijing	Sapporo	0	0	0	0	0	0	0	0	0	0	0	0	0	0	0	0	0	0	0	0	0	0	0	0	0	0	0	0	0	0	0	0	0	0	0	0	2055.71	8.3166	0.606776	7.17079	0.130086	2.51999	16143.7	129.424	9.47911	103.983	1.64865
72	Beijing	Stockholm	0	0	0	0	0	0	0	0	0	0	0	0	0	0	0	0	0	0	0	0	0	0	0	0	0	0	0	0	0	0	0	0	0	0	0	0	5051.71	13.954	2.14182	28.0189	0.306454	6.19262	103485	601.066	92.4377	1060.29	8.16996
73	Beijing	Geneva	0	0	0	0	0	0	0	0	0	0	0	0	0	0	0	0	0	0	0	0	0	0	0	0	0	0	0	0	0	0	0	0	0	0	0	0	1973.01	5.98026	0.917923	12.0081	0.131337	2.41861	52959	307.6	47.3057	548.278	4.22469
74	Beijing	Zurich	0	0	0	0	0	0	0	0	0	0	0	0	0	0	0	0	0	0	0	0	0	0	0	0	0	0	0	0	0	0	0	0	0	0	0	0	2630.68	7.97369	1.2239	16.0108	0.175117	3.22481	70635.4	410.269	63.0951	723.724	5.57656
75	Beijing	Colombo	0	0	0	0	0	0	0	0	0	0	0	0	0	0	0	0	0	0	0	0	0	0	0	0	0	0	0	0	0	0	0	0	0	0	0	0	0	0	0	0	0	0	0	0	0	0	0
76	Beijing	Bangkok	0	0	0	0	0	0	0	0	0	0	0	0	0	0	0	0	0	0	0	0	0	0	0	0	3492.47	15.164	1.60784	13.1533	0.216898	4.28124	21170.8	237.187	25.0708	188.398	2.83064	25.9521	13961	51.2965	4.57944	73.8553	0.8906	17.114	180964	1281.24	114.657	1737.12	17.0647
77	Beijing	Chiang Mai	0	0	0	0	0	0	0	0	0	0	0	0	0	0	0	0	0	0	0	0	0	0	0	0	0	0	0	0	0	0	0	0	0	0	0	0	881.019	3.56426	0.260047	3.0732	0.0557511	1.08	9833.51	78.8353	5.77396	63.3388	1.00423
78	Beijing	Phuket	0	0	0	0	0	0	0	0	0	0	0	0	0	0	0	0	0	0	0	0	0	0	0	0	0	0	0	0	0	0	0	0	0	0	0	0	2055.71	8.3166	0.606776	7.17079	0.130086	2.51999	29734.6	238.383	17.4593	191.524	3.0366
79	Beijing	Istanbul	0	0	0	0	0	0	0	0	0	0	0	0	0	0	0	0	0	0	0	0	0	0	0	0	0	0	0	0	0	0	0	0	0	0	0	0	0	0	0	0	0	0	0	0	0	0	0
80	Beijing	Ashkhabad	0	0	0	0	0	0	0	0	0	0	0	0	0	0	0	0	0	0	0	0	0	0	0	0	0	0	0	0	0	0	0	0	0	0	0	0	0	0	0	0	0	0	0	0	0	0	0
81	Beijing	Tashkent	0	0	0	0	0	0	0	0	0	0	0	0	0	0	0	0	0	0	0	0	0	0	0	0	0	0	0	0	0	0	0	0	0	0	0	0	0	0	0	0	0	0	0	0	0	0	0
82	Beijing	Barcelona	0	0	0	0	0	0	0	0	0	0	0	0	0	0	0	0	0	0	0	0	0	0	0	0	0	0	0	0	0	0	0	0	0	0	0	0	5773.38	15.9474	2.44779	32.0216	0.350233	7.07728	82104.5	476.885	73.3399	841.235	5.48541
83	Beijing	Madrid	0	0	0	0	0	0	0	0	0	0	0	0	0	0	0	0	0	0	0	0	0	0	0	0	0	0	0	0	0	0	0	0	0	0	0	0	2784.63	4.43141	0.142506	17.5692	0.178329	3.41353	92442.9	411.587	10.5779	1617.93	10.583
84	Beijing	Athens	0	0	0	0	0	0	0	0	0	0	0	0	0	0	0	0	0	0	0	0	0	0	0	0	0	0	0	0	0	0	0	0	0	0	0	0	2886.69	7.97369	1.2239	16.0108	0.175117	3.53864	41733.6	233.471	35.9054	411.848	3.29538
85	Beijing	Singapore	0	0	0	0	0	0	0	0	0	0	0	0	0	0	0	0	0	0	0	0	0	0	0	0	0	0	0	0	0	0	0	0	0	0	0	0	10103.4	27.9079	4.28364	56.0377	0.612908	12.3852	145489	845.04	129.958	0	0
86	Beijing	Auckland	0	0	0	0	0	0	0	0	0	0	0	0	0	0	0	0	0	0	0	0	0	0	0	0	0	0	0	0	0	0	0	0	0	0	0	0	3898.48	6.20398	0.199509	24.5969	0.24966	4.77894	138393	616.173	15.8357	2422.15	15.8435
87	Beijing	Budapest	0	0	0	0	0	0	0	0	0	0	0	0	0	0	0	0	0	0	0	0	0	0	0	0	0	0	0	0	0	0	0	0	0	0	0	0	5261.36	15.9474	2.44779	32.0216	0.350233	6.44962	73509.8	426.964	65.6626	753.175	5.80349
88	Beijing	Teheran	0	0	0	0	0	0	0	0	0	0	0	0	0	0	0	0	0	0	0	0	0	0	0	0	0	0	0	0	0	0	0	0	0	0	0	0	0	0	0	0	0	0	0	0	0	0	0
89	Beijing	Tel Aviv	0	0	0	0	0	0	0	0	0	0	0	0	0	0	0	0	0	0	0	0	0	0	0	0	0	0	0	0	0	0	0	0	0	0	0	0	0	0	0	0	0	0	0	0	0	0	0
90	Beijing	Milan	0	0	0	0	0	0	0	0	0	0	0	0	0	0	0	0	0	0	0	0	0	0	0	0	0	0	0	0	0	0	0	0	0	0	0	0	4603.69	13.954	2.14182	28.0189	0.306454	5.64342	121933	708.218	108.917	1249.31	9.62642
91	Beijing	Rome	0	0	0	0	0	0	0	0	0	0	0	0	0	0	0	0	0	0	0	0	0	0	0	0	0	0	0	0	0	0	0	0	0	0	0	0	3898.48	6.20398	0.199509	24.5969	0.24966	4.77894	117339	522.435	13.4266	2053.67	13.4332
92	Beijing	Mumbai	0	0	0	0	0	0	0	0	0	0	0	0	0	0	0	0	0	0	0	0	0	0	0	0	0	0	0	0	0	0	0	0	0	0	0	0	2165.02	5.98026	0.917923	12.0081	0.131337	2.65398	36040.3	209.331	32.193	369.266	2.84533
93	Beijing	New Delhi	0	0	0	0	0	0	0	0	0	0	0	0	0	0	0	0	0	0	0	0	0	0	0	0	9207.38	27.9079	4.28364	56.0377	0.612908	11.2868	98935.9	407.327	62.6427	718.534	5.53657	121.28	2165.02	5.98026	0.917923	12.0081	0.131337	2.65398	26280.7	152.645	23.4753	269.27	2.07482
94	Beijing	Bali	0	0	0	0	0	0	0	0	0	0	0	0	0	0	0	0	0	0	0	0	0	0	0	0	0	0	0	0	0	0	0	0	0	0	0	0	0	0	0	0	0	0	0	0	0	0	0
95	Beijing	Jakarta	0	0	0	0	0	0	0	0	0	0	0	0	0	0	0	0	0	0	0	0	0	0	0	0	0	0	0	0	0	0	0	0	0	0	0	0	1762.04	7.12851	0.520094	6.14639	0.111502	2.15999	17743.6	6258.48	10.4185	117.869	1.81204
96	Beijing	Manchester	0	0	0	0	0	0	0	0	0	0	0	0	0	0	0	0	0	0	0	0	0	0	0	0	0	0	0	0	0	0	0	0	0	0	0	0	0	0	0	0	0	0	0	0	0	0	0
97	Beijing	London	0	0	0	0	0	0	0	0	0	0	0	0	0	0	0	0	0	0	0	0	0	0	0	0	0	0	0	0	0	0	0	0	0	0	0	0	10572.6	44.0537	5.29542	78.2064	0.744454	12.9604	301607	2208.91	266.506	3609.19	24.0948
98	Beijing	Da Nang	0	0	0	0	0	0	0	0	0	0	0	0	0	0	0	0	0	0	0	0	0	0	0	0	1164.16	5.05466	0.535945	4.38442	0.0722992	1.42708	13906.5	121.397	12.8317	96.4257	1.44877	17.0472	0	0	0	0	0	0	0	0	0	0	0
99	Beijing	Hanoi	0	0	0	0	0	0	0	0	0	0	0	0	0	0	0	0	0	0	0	0	0	0	0	0	0	0	0	0	0	0	0	0	0	0	0	0	0	0	0	0	0	0	0	0	0	0	0
100	Beijing	Ho Chi Minh City	0	0	0	0	0	0	0	0	0	0	0	0	0	0	0	0	0	0	0	0	0	0	0	0	0	0	0	0	0	0	0	0	0	0	0	0	3748.4	9.76375	0.92345	5.36813	0.114946	4.59497	24723.1	255.719	15.9257	135.07	2.08688
101	Beijing	Nha Trang	0	0	0	0	0	0	0	0	0	0	0	0	0	0	0	0	0	0	0	0	0	0	0	0	0	0	0	0	0	0	0	0	0	0	0	0	0	0	0	0	0	0	0	0	0	0	0
102	Shanghai Pudong	Dubai	0	0	0	0	0	0	0	0	0	0	0	0	0	0	0	0	0	0	0	0	0	0	0	0	0	0	0	0	0	0	0	0	0	0	0	0	0	0	0	0	0	0	0	0	0	0	0
103	Shanghai Pudong	Baku	0	0	0	0	0	0	0	0	0	0	0	0	0	0	0	0	0	0	0	0	0	0	0	0	0	0	0	0	0	0	0	0	0	0	0	0	0	0	0	0	0	0	0	0	0	0	0
104	Shanghai Pudong	Vienna	0	0	0	0	0	0	0	0	0	0	0	0	0	0	0	0	0	0	0	0	0	0	0	0	0	0	0	0	0	0	0	0	0	0	0	0	0	0	0	0	0	0	0	0	0	0	0
105	Shanghai Pudong	Brisbane	0	0	0	0	0	0	0	0	0	0	0	0	0	0	0	0	0	0	0	0	0	0	0	0	2630.68	7.97369	1.2239	16.0108	0.175117	3.22481	67868.3	394.197	60.6234	695.372	5.3581	83.1961	0	0	0	0	0	0	0	0	0	0	0
106	Shanghai Pudong	Melbourne	0	0	0	0	0	0	0	0	0	0	0	0	0	0	0	0	0	0	0	0	0	0	0	0	4603.69	13.954	2.14182	28.0189	0.306454	5.64342	120911	702.282	108.004	1238.84	9.54573	148.218	3946.02	11.9605	1.83585	24.0162	0.262675	4.83722	103638	601.956	92.5746	1061.86	8.18206
107	Shanghai Pudong	Sydney	0	0	0	0	0	0	0	0	0	0	0	0	0	0	0	0	0	0	0	0	0	0	0	0	5919.03	17.9408	2.75377	36.0242	0.394012	7.25583	157076	912.337	140.308	1609.38	12.4009	192.551	1973.01	5.98026	0.917923	12.0081	0.131337	2.41861	52358.6	304.112	46.7693	536.461	4.13363
108	Shanghai Pudong	Saipan	0	0	0	0	0	0	0	0	0	0	0	0	0	0	0	0	0	0	0	0	0	0	0	0	0	0	0	0	0	0	0	0	0	0	0	0	0	0	0	0	0	0	0	0	0	0	0
109	Shanghai Pudong	Pyongyang	0	0	0	0	0	0	0	0	0	0	0	0	0	0	0	0	0	0	0	0	0	0	0	0	0	0	0	0	0	0	0	0	0	0	0	0	0	0	0	0	0	0	0	0	0	0	0
110	Shanghai Pudong	Copenhagen	0	0	0	0	0	0	0	0	0	0	0	0	0	0	0	0	0	0	0	0	0	0	0	0	0	0	0	0	0	0	0	0	0	0	0	0	0	0	0	0	0	0	0	0	0	0	0
111	Shanghai Pudong	Frankfurt	0	0	0	0	0	0	0	0	0	0	0	0	0	0	0	0	0	0	0	0	0	0	0	0	4603.69	13.954	2.14182	28.0189	0.306454	5.64342	135746	788.449	121.255	1390.84	10.7169	166.404	4603.69	13.954	2.14182	28.0189	0.306454	5.64342	135746	788.449	121.255	1390.84	10.7169
112	Shanghai Pudong	Munich	0	0	0	0	0	0	0	0	0	0	0	0	0	0	0	0	0	0	0	0	0	0	0	0	0	0	0	0	0	0	0	0	0	0	0	0	1973.01	5.98026	0.917923	12.0081	0.131337	2.41861	57650.5	334.85	51.4964	590.682	4.55143
113	Shanghai Pudong	Saint Petersburg	0	0	0	0	0	0	0	0	0	0	0	0	0	0	0	0	0	0	0	0	0	0	0	0	3946.02	11.9605	1.83585	24.0162	0.262675	4.83722	99998.7	580.819	89.3239	1024.58	7.89475	122.583	0	0	0	0	0	0	0	0	0	0	0
114	Shanghai Pudong	Novosibirsk	0	0	0	0	0	0	0	0	0	0	0	0	0	0	0	0	0	0	0	0	0	0	0	0	0	0	0	0	0	0	0	0	0	0	0	0	0	0	0	0	0	0	0	0	0	0	0
115	Shanghai Pudong	Moscow	0	0	0	0	0	0	0	0	0	0	0	0	0	0	0	0	0	0	0	0	0	0	0	0	9207.38	27.9079	4.28364	56.0377	0.612908	11.2868	222803	1294.1	199.019	2282.82	17.5899	273.122	0	0	0	0	0	0	0	0	0	0	0
116	Shanghai Pudong	Vladivostok	0	0	0	0	0	0	0	0	0	0	0	0	0	0	0	0	0	0	0	0	0	0	0	0	0	0	0	0	0	0	0	0	0	0	0	0	0	0	0	0	0	0	0	0	0	0	0
117	Shanghai Pudong	Paris	0	0	0	0	0	0	0	0	0	0	0	0	0	0	0	0	0	0	0	0	0	0	0	0	11041.8	60.1996	6.3072	100.375	0.876	13.5355	398607	3338.18	349.555	5245.48	32.1036	488.631	3288.35	9.96711	1.52987	20.0135	0.218896	4.03101	102246	593.87	91.331	1047.6	8.07214
118	Shanghai Pudong	Kalibo	0	0	0	0	0	0	0	0	0	0	0	0	0	0	0	0	0	0	0	0	0	0	0	0	0	0	0	0	0	0	0	0	0	0	0	0	0	0	0	0	0	0	0	0	0	0	0
119	Shanghai Pudong	Manila	0	0	0	0	0	0	0	0	0	0	0	0	0	0	0	0	0	0	0	0	0	0	0	0	2037.28	8.84566	0.937904	7.67274	0.126524	2.49739	15125.6	132.039	13.9566	104.879	1.57578	18.5417	0	0	0	0	0	0	0	0	0	0	0
120	Shanghai Pudong	Helsinki	0	0	0	0	0	0	0	0	0	0	0	0	0	0	0	0	0	0	0	0	0	0	0	0	0	0	0	0	0	0	0	0	0	0	0	0	0	0	0	0	0	0	0	0	0	0	0
121	Shanghai Pudong	Jeju	0	0	0	0	0	0	0	0	0	0	0	0	0	0	0	0	0	0	0	0	0	0	0	0	5545.55	23.5562	2.26192	20.3958	0.346475	6.798	15870.1	135.343	13.1388	107.831	1.64412	19.4543	0	0	0	0	0	0	0	0	0	0	0
122	Shanghai Pudong	Busan	0	0	0	0	0	0	0	0	0	0	0	0	0	0	0	0	0	0	0	0	0	0	0	0	2037.28	8.84566	0.937904	7.67274	0.126524	2.49739	8589.88	74.9852	7.92598	59.561	0.89489	10.5299	0	0	0	0	0	0	0	0	0	0	0
123	Shanghai Pudong	Daegu	0	0	0	0	0	0	0	0	0	0	0	0	0	0	0	0	0	0	0	0	0	0	0	0	1164.16	5.05466	0.535945	4.38442	0.0722992	1.42708	5064.34	44.2091	4.67292	35.1154	0.527601	6.20811	0	0	0	0	0	0	0	0	0	0	0
124	Shanghai Pudong	Seoul	0	0	0	0	0	0	0	0	0	0	0	0	0	0	0	0	0	0	0	0	0	0	0	0	6984.94	30.328	3.21567	26.3065	0.433795	8.56247	32064.5	279.907	29.5863	222.331	3.34047	39.3062	0	0	0	0	0	0	0	0	0	0	0
125	Shanghai Hongqiao	Seoul	0	0	0	0	0	0	0	0	0	0	0	0	0	0	0	0	0	0	0	0	0	0	0	0	2037.28	8.84566	0.937904	7.67274	0.126524	2.49739	10258.9	89.5547	9.46598	71.1336	1.06877	12.5758	0	0	0	0	0	0	0	0	0	0	0
126	Shanghai Pudong	Amsterdam	0	0	0	0	0	0	0	0	0	0	0	0	0	0	0	0	0	0	0	0	0	0	0	0	2630.68	7.97369	1.2239	16.0108	0.175117	3.22481	78025.3	453.191	69.6961	799.44	6.15998	95.6471	0	0	0	0	0	0	0	0	0	0	0
127	Shanghai Pudong	Montreal	0	0	0	0	0	0	0	0	0	0	0	0	0	0	0	0	0	0	0	0	0	0	0	0	0	0	0	0	0	0	0	0	0	0	0	0	0	0	0	0	0	0	0	0	0	0	0
128	Shanghai Pudong	Toronto	0	0	0	0	0	0	0	0	0	0	0	0	0	0	0	0	0	0	0	0	0	0	0	0	5520.88	30.0998	3.1536	50.1875	0.438	6.76775	232700	1948.78	204.065	3062.23	18.7416	285.255	0	0	0	0	0	0	0	0	0	0	0
129	Shanghai Pudong	Vancouver	0	0	0	0	0	0	0	0	0	0	0	0	0	0	0	0	0	0	0	0	0	0	0	0	8151.56	38.0735	4.3775	66.1983	0.613117	9.99256	274503	2093.87	242.026	3379.61	21.9813	336.499	0	0	0	0	0	0	0	0	0	0	0
130	Shanghai Pudong	Phnom Penh	0	0	0	0	0	0	0	0	0	0	0	0	0	0	0	0	0	0	0	0	0	0	0	0	2037.28	8.84566	0.937904	7.67274	0.126524	2.49739	24482.6	213.721	22.5904	169.759	2.55059	30.0119	0	0	0	0	0	0	0	0	0	0	0
131	Shanghai Pudong	Siem Reap	0	0	0	0	0	0	0	0	0	0	0	0	0	0	0	0	0	0	0	0	0	0	0	0	2037.28	8.84566	0.937904	7.67274	0.126524	2.49739	21402.4	186.832	19.7482	148.401	2.22969	26.2361	0	0	0	0	0	0	0	0	0	0	0
132	Shanghai Pudong	Prague	0	0	0	0	0	0	0	0	0	0	0	0	0	0	0	0	0	0	0	0	0	0	0	0	1973.01	5.98026	0.917923	12.0081	0.131337	2.41861	56032.1	325.449	50.0508	574.1	4.42366	68.6869	0	0	0	0	0	0	0	0	0	0	0
133	Shanghai Pudong	Male	0	0	0	0	0	0	0	0	0	0	0	0	0	0	0	0	0	0	0	0	0	0	0	0	5051.7	13.954	2.14182	28.0189	0.306454	6.19262	93232.7	541.52	83.2801	955.254	7.36058	114.289	0	0	0	0	0	0	0	0	0	0	0
134	Shanghai Pudong	Sabah	0	0	0	0	0	0	0	0	0	0	0	0	0	0	0	0	0	0	0	0	0	0	0	0	0	0	0	0	0	0	0	0	0	0	0	0	0	0	0	0	0	0	0	0	0	0	0
135	Shanghai Pudong	Kuala Lumpur	5051.71	13.954	2.14182	28.0189	0.306454	6.19262	60694.2	352.528	54.2151	621.867	4.79171	74.4018	0	0	0	0	0	0	0	0	0	0	0	0	0	0	0	0	0	0	0	0	0	0	0	0	0	0	0	0	0	0	0	0	0	0	0
136	Shanghai Pudong	Anchorage	0	0	0	0	0	0	0	0	0	0	0	0	0	0	0	0	0	0	0	0	0	0	0	0	0	0	0	0	0	0	0	0	0	0	0	0	7738.92	27.2355	2.64462	46.7608	0.495336	9.48673	172429	1156.86	112.417	1870.73	15.7258
137	Shanghai Pudong	Atlanta	0	0	0	0	0	0	0	0	0	0	0	0	0	0	0	0	0	0	0	0	0	0	0	0	0	0	0	0	0	0	0	0	0	0	0	0	0	0	0	0	0	0	0	0	0	0	0
138	Shanghai Pudong	Boston	0	0	0	0	0	0	0	0	0	0	0	0	0	0	0	0	0	0	0	0	0	0	0	0	0	0	0	0	0	0	0	0	0	0	0	0	0	0	0	0	0	0	0	0	0	0	0
139	Shanghai Pudong	Chicago	0	0	0	0	0	0	0	0	0	0	0	0	0	0	0	0	0	0	0	0	0	0	0	0	3943.48	21.4999	2.25257	35.8482	0.312857	4.83411	165023	1382	144.716	2171.62	13.2909	202.293	0	0	0	0	0	0	0	0	0	0	0
140	Shanghai Pudong	Dallas	0	0	0	0	0	0	0	0	0	0	0	0	0	0	0	0	0	0	0	0	0	0	0	0	0	0	0	0	0	0	0	0	0	0	0	0	0	0	0	0	0	0	0	0	0	0	0
141	Shanghai Pudong	Los Angeles	0	0	0	0	0	0	0	0	0	0	0	0	0	0	0	0	0	0	0	0	0	0	0	0	11041.8	60.1996	6.3072	100.375	0.876	13.5355	406907	3407.69	356.834	5354.71	32.7721	498.806	0	0	0	0	0	0	0	0	0	0	0
142	Shanghai Pudong	Honolulu	0	0	0	0	0	0	0	0	0	0	0	0	0	0	0	0	0	0	0	0	0	0	0	0	4330.03	11.9605	1.83585	24.0162	0.262675	5.30796	99634.1	578.701	88.9982	1020.84	7.86597	122.136	0	0	0	0	0	0	0	0	0	0	0
143	Shanghai Pudong	New York	0	0	0	0	0	0	0	0	0	0	0	0	0	0	0	0	0	0	0	0	0	0	0	0	11041.8	60.1996	6.3072	100.375	0.876	13.5355	470499	3940.25	412.601	6191.55	37.8937	576.76	0	0	0	0	0	0	0	0	0	0	0
144	Shanghai Pudong	Seattle	0	0	0	0	0	0	0	0	0	0	0	0	0	0	0	0	0	0	0	0	0	0	0	0	0	0	0	0	0	0	0	0	0	0	0	0	0	0	0	0	0	0	0	0	0	0	0
145	Shanghai Pudong	San Francisco	0	0	0	0	0	0	0	0	0	0	0	0	0	0	0	0	0	0	0	0	0	0	0	0	5520.88	30.0998	3.1536	50.1875	0.438	6.76775	179821	1505.93	157.693	2366.36	14.4827	220.433	0	0	0	0	0	0	0	0	0	0	0
146	Shanghai Pudong	Mexico City	0	0	0	0	0	0	0	0	0	0	0	0	0	0	0	0	0	0	0	0	0	0	0	0	0	0	0	0	0	0	0	0	0	0	0	0	0	0	0	0	0	0	0	0	0	0	0
147	Shanghai Pudong	Niigata	0	0	0	0	0	0	0	0	0	0	0	0	0	0	0	0	0	0	0	0	0	0	0	0	582.079	2.52733	0.267973	2.19221	0.0361496	0.71354	3940.91	34.4021	3.63632	27.3257	0.410562	4.83095	0	0	0	0	0	0	0	0	0	0	0
148	Shanghai Pudong	Fukuoka	0	0	0	0	0	0	0	0	0	0	0	0	0	0	0	0	0	0	0	0	0	0	0	0	6148.7	25.4789	2.15146	22.0143	0.386696	7.53737	26395.2	218.263	18.6317	174.616	2.71477	32.3565	2037.28	8.84566	0.937904	7.67274	0.126524	2.49739	10647.4	92.9461	9.82445	73.8274	1.10924
149	Shanghai Pudong	Komatsu	0	0	0	0	0	0	0	0	0	0	0	0	0	0	0	0	0	0	0	0	0	0	0	0	1164.16	5.05466	0.535945	4.38442	0.0722992	1.42708	6452.25	56.3249	5.95357	44.739	0.672193	7.90948	0	0	0	0	0	0	0	0	0	0	0
150	Shanghai Pudong	Kagoshima	0	0	0	0	0	0	0	0	0	0	0	0	0	0	0	0	0	0	0	0	0	0	0	0	582.079	2.52733	0.267973	2.19221	0.0361496	0.71354	2563.13	22.3748	2.36503	17.7724	0.267026	3.14201	0	0	0	0	0	0	0	0	0	0	0
151	Shanghai Pudong	Saga	0	0	0	0	0	0	0	0	0	0	0	0	0	0	0	0	0	0	0	0	0	0	0	0	0	0	0	0	0	0	0	0	0	0	0	0	0	0	0	0	0	0	0	0	0	0	0
152	Shanghai Pudong	Hiroshima	0	0	0	0	0	0	0	0	0	0	0	0	0	0	0	0	0	0	0	0	0	0	0	0	2037.28	8.84566	0.937904	7.67274	0.126524	2.49739	8508.39	74.2739	7.85079	58.996	0.886401	10.43	0	0	0	0	0	0	0	0	0	0	0
153	Shanghai Pudong	Matsuyama	0	0	0	0	0	0	0	0	0	0	0	0	0	0	0	0	0	0	0	0	0	0	0	0	582.079	2.52733	0.267973	2.19221	0.0361496	0.71354	2352.97	20.5402	2.17111	16.3152	0.245131	2.88438	0	0	0	0	0	0	0	0	0	0	0
154	Shanghai Pudong	Okinawa	0	0	0	0	0	0	0	0	0	0	0	0	0	0	0	0	0	0	0	0	0	0	0	0	6640.96	22.7996	3.07972	35.6916	0.432978	8.14081	28368.7	189.709	25.5918	208.089	2.03663	34.7756	0	0	0	0	0	0	0	0	0	0	0
155	Shanghai Pudong	Okayama	0	0	0	0	0	0	0	0	0	0	0	0	0	0	0	0	0	0	0	0	0	0	0	0	2037.28	8.84566	0.937904	7.67274	0.126524	2.49739	9228.8	80.5627	8.51552	63.9912	0.961453	11.3131	0	0	0	0	0	0	0	0	0	0	0
156	Shanghai Pudong	Nagoya	0	0	0	0	0	0	0	0	0	0	0	0	3748.4	9.76375	0.92345	5.36813	0.114946	4.59497	11204.8	115.895	7.21774	61.2154	0.945802	13.7354	8167.54	34.8536	3.42049	30.189	0.509657	10.0122	55458	474.804	46.7844	378.095	5.75071	67.983	2037.28	8.84566	0.937904	7.67274	0.126524	2.49739	11982.9	104.605	11.0568	83.0879	1.24838
157	Shanghai Pudong	Nagasaki	0	0	0	0	0	0	0	0	0	0	0	0	0	0	0	0	0	0	0	0	0	0	0	0	582.079	2.52733	0.267973	2.19221	0.0361496	0.71354	2133.96	18.6284	1.96903	14.7966	0.222315	2.61591	0	0	0	0	0	0	0	0	0	0	0
158	Shanghai Pudong	Osaka	0	0	0	0	0	0	0	0	0	0	0	0	9852.88	37.1782	5.78779	43.8646	0.631248	12.0781	46030.1	344.699	51.8256	362.347	4.33891	56.4258	6148.7	25.4789	2.15146	22.0143	0.386696	7.53737	35469.7	292.789	24.7962	234.294	3.64662	43.4805	6130.26	26.0079	2.48258	22.5163	0.383133	7.51477	33484.9	283.884	26.9308	226.355	3.46414
159	Shanghai Hongqiao	Tokyo	0	0	0	0	0	0	0	0	0	0	0	0	3898.48	6.20398	0.199509	24.5969	0.24966	4.77894	26845	119.523	3.07176	469.84	2.10838	32.9078	2037.28	8.84566	0.937904	7.67274	0.126524	2.49739	15751	137.498	14.5336	109.215	1.64093	19.3083	0	0	0	0	0	0	0	0	0	0	0
160	Shanghai Pudong	Tokyo	0	0	0	0	0	0	0	0	0	0	0	0	19511	46.9445	5.44842	109.983	1.2537	23.9176	134145	730.416	72.3676	1863.92	13.1323	164.441	13200.8	49.3366	5.89344	58.7098	0.812548	16.1822	97967.2	760.753	89.4429	786.378	9.3904	120.093	11263.1	36.2245	4.89042	63.2085	0.742994	13.8068	76586.9	476.863	63.9731	755.949	6.586
161	Shanghai Pudong	Takamatsu	0	0	0	0	0	0	0	0	0	0	0	0	0	0	0	0	0	0	0	0	0	0	0	0	0	0	0	0	0	0	0	0	0	0	0	0	0	0	0	0	0	0	0	0	0	0	0
162	Shanghai Pudong	Sendai	0	0	0	0	0	0	0	0	0	0	0	0	0	0	0	0	0	0	0	0	0	0	0	0	0	0	0	0	0	0	0	0	0	0	0	0	587.346	2.37617	0.173365	2.0488	0.0371674	0.719997	4467.26	35.814	2.62305	28.7742	0.456212
163	Shanghai Pudong	Sapporo	0	0	0	0	0	0	0	0	0	0	0	0	0	0	0	0	0	0	0	0	0	0	0	0	2037.28	8.84566	0.937904	7.67274	0.126524	2.49739	18960.3	165.514	17.4949	131.468	1.97528	23.2425	0	0	0	0	0	0	0	0	0	0	0
164	Shanghai Pudong	Toyama	0	0	0	0	0	0	0	0	0	0	0	0	0	0	0	0	0	0	0	0	0	0	0	0	0	0	0	0	0	0	0	0	0	0	0	0	0	0	0	0	0	0	0	0	0	0	0
165	Shanghai Pudong	Ibaraki	0	0	0	0	0	0	0	0	0	0	0	0	0	0	0	0	0	0	0	0	0	0	0	0	0	0	0	0	0	0	0	0	0	0	0	0	0	0	0	0	0	0	0	0	0	0	0
166	Shanghai Pudong	Shizuoka	0	0	0	0	0	0	0	0	0	0	0	0	0	0	0	0	0	0	0	0	0	0	0	0	2055.71	8.3166	0.606776	7.17079	0.130086	2.51999	12829.5	102.854	7.53311	82.6361	1.31019	15.727	0	0	0	0	0	0	0	0	0	0	0
167	Shanghai Pudong	Zurich	0	0	0	0	0	0	0	0	0	0	0	0	0	0	0	0	0	0	0	0	0	0	0	0	0	0	0	0	0	0	0	0	0	0	0	0	0	0	0	0	0	0	0	0	0	0	0
168	Shanghai Pudong	Colombo	0	0	0	0	0	0	0	0	0	0	0	0	0	0	0	0	0	0	0	0	0	0	0	0	2630.68	7.97369	1.2239	16.0108	0.175117	3.22481	46733.1	271.438	41.7444	478.823	3.68951	57.2876	0	0	0	0	0	0	0	0	0	0	0
169	Shanghai Pudong	Bangkok	0	0	0	0	0	0	0	0	0	0	0	0	0	0	0	0	0	0	0	0	0	0	0	0	2037.28	8.84566	0.937904	7.67274	0.126524	2.49739	22660.8	197.817	20.9094	157.127	2.3608	27.7787	0	0	0	0	0	0	0	0	0	0	0
170	Shanghai Pudong	Chiang Mai	0	0	0	0	0	0	0	0	0	0	0	0	0	0	0	0	0	0	0	0	0	0	0	0	2037.28	8.84566	0.937904	7.67274	0.126524	2.49739	21354.5	186.414	19.704	148.069	2.2247	26.1774	0	0	0	0	0	0	0	0	0	0	0
171	Shanghai Pudong	Phuket	0	0	0	0	0	0	0	0	0	0	0	0	0	0	0	0	0	0	0	0	0	0	0	0	0	0	0	0	0	0	0	0	0	0	0	0	0	0	0	0	0	0	0	0	0	0	0
172	Shanghai Pudong	Istanbul	0	0	0	0	0	0	0	0	0	0	0	0	0	0	0	0	0	0	0	0	0	0	0	0	0	0	0	0	0	0	0	0	0	0	0	0	0	0	0	0	0	0	0	0	0	0	0
173	Shanghai Pudong	Seri Begawan	0	0	0	0	0	0	0	0	0	0	0	0	0	0	0	0	0	0	0	0	0	0	0	0	0	0	0	0	0	0	0	0	0	0	0	0	0	0	0	0	0	0	0	0	0	0	0
174	Shanghai Pudong	Barcelona	0	0	0	0	0	0	0	0	0	0	0	0	0	0	0	0	0	0	0	0	0	0	0	0	0	0	0	0	0	0	0	0	0	0	0	0	1973.01	5.98026	0.917923	12.0081	0.131337	2.41861	65806	382.219	58.7813	674.243	5.19529
175	Shanghai Pudong	Madrid	0	0	0	0	0	0	0	0	0	0	0	0	0	0	0	0	0	0	0	0	0	0	0	0	2630.68	7.97369	1.2239	16.0108	0.175117	3.22481	92765.2	538.805	82.8626	950.464	7.32368	113.716	0	0	0	0	0	0	0	0	0	0	0
176	Shanghai Pudong	Singapore	0	0	0	0	0	0	0	0	0	0	0	0	0	0	0	0	0	0	0	0	0	0	0	0	18862.8	55.8158	8.56728	112.075	1.22582	23.1229	251758	1462.28	224.883	2579.5	19.876	308.617	0	0	0	0	0	0	0	0	0	0	0
177	Shanghai Pudong	Auckland	0	0	0	0	0	0	0	0	0	0	0	0	0	0	0	0	0	0	0	0	0	0	0	0	4603.69	13.954	2.14182	28.0189	0.306454	5.64342	145311	844.005	129.799	1488.84	11.4721	178.129	0	0	0	0	0	0	0	0	0	0	0
178	Shanghai Pudong	Teheran	0	0	0	0	0	0	0	0	0	0	0	0	0	0	0	0	0	0	0	0	0	0	0	0	0	0	0	0	0	0	0	0	0	0	0	0	0	0	0	0	0	0	0	0	0	0	0
179	Shanghai Pudong	Milan	0	0	0	0	0	0	0	0	0	0	0	0	0	0	0	0	0	0	0	0	0	0	0	0	0	0	0	0	0	0	0	0	0	0	0	0	4603.69	13.954	2.14182	28.0189	0.306454	5.64342	140853	818.11	125.817	1443.17	11.1201
180	Shanghai Pudong	Rome	0	0	0	0	0	0	0	0	0	0	0	0	0	0	0	0	0	0	0	0	0	0	0	0	4603.69	13.954	2.14182	28.0189	0.306454	5.64342	141503	821.887	126.398	1449.83	11.1715	173.461	0	0	0	0	0	0	0	0	0	0	0
181	Shanghai Pudong	Mumbai	0	0	0	0	0	0	0	0	0	0	0	0	0	0	0	0	0	0	0	0	0	0	0	0	0	0	0	0	0	0	0	0	0	0	0	0	0	0	0	0	0	0	0	0	0	0	0
182	Shanghai Pudong	New Delhi	0	0	0	0	0	0	0	0	0	0	0	0	0	0	0	0	0	0	0	0	0	0	0	0	4603.69	13.954	2.14182	28.0189	0.306454	5.64342	70128.9	407.327	62.6427	718.534	5.53657	85.9673	0	0	0	0	0	0	0	0	0	0	0
183	Shanghai Pudong	Bali	0	0	0	0	0	0	0	0	0	0	0	0	0	0	0	0	0	0	0	0	0	0	0	0	5051.71	13.954	2.14182	28.0189	0.306454	6.19262	72744.7	422.52	64.9792	745.335	5.74308	89.1738	0	0	0	0	0	0	0	0	0	0	0
184	Shanghai Pudong	Jakarta	0	0	0	0	0	0	0	0	0	0	0	0	0	0	0	0	0	0	0	0	0	0	0	0	0	0	0	0	0	0	0	0	0	0	0	0	0	0	0	0	0	0	0	0	0	0	0
185	Shanghai Pudong	London	0	0	0	0	0	0	0	0	0	0	0	0	0	0	0	0	0	0	0	0	0	0	0	0	4603.69	13.954	2.14182	28.0189	0.306454	5.64342	142478	827.551	127.269	1459.82	11.2484	174.657	0	0	0	0	0	0	0	0	0	0	0
186	Shanghai Pudong	Da Nang	0	0	0	0	0	0	0	0	0	0	0	0	0	0	0	0	0	0	0	0	0	0	0	0	0	0	0	0	0	0	0	0	0	0	0	0	0	0	0	0	0	0	0	0	0	0	0
187	Shanghai Pudong	Hanoi	0	0	0	0	0	0	0	0	0	0	0	0	0	0	0	0	0	0	0	0	0	0	0	0	0	0	0	0	0	0	0	0	0	0	0	0	0	0	0	0	0	0	0	0	0	0	0
188	Shanghai Pudong	Ho Chi Minh City	0	0	0	0	0	0	0	0	0	0	0	0	0	0	0	0	0	0	0	0	0	0	0	0	2037.28	8.84566	0.937904	7.67274	0.126524	2.49739	21841.5	190.665	20.1534	151.446	2.27543	26.7743	0	0	0	0	0	0	0	0	0	0	0
189	Shanghai Pudong	Nha Trang	0	0	0	0	0	0	0	0	0	0	0	0	0	0	0	0	0	0	0	0	0	0	0	0	0	0	0	0	0	0	0	0	0	0	0	0	0	0	0	0	0	0	0	0	0	0	0
190	Guangzhou	Dubai	0	0	0	0	0	0	0	0	0	0	0	0	0	0	0	0	0	0	0	0	0	0	0	0	0	0	0	0	0	0	0	0	0	0	0	0	0	0	0	0	0	0	0	0	0	0	0
191	Guangzhou	Baku	0	0	0	0	0	0	0	0	0	0	0	0	0	0	0	0	0	0	0	0	0	0	0	0	0	0	0	0	0	0	0	0	0	0	0	0	0	0	0	0	0	0	0	0	0	0	0
192	Guangzhou	Cairo	0	0	0	0	0	0	0	0	0	0	0	0	0	0	0	0	0	0	0	0	0	0	0	0	0	0	0	0	0	0	0	0	0	0	0	0	0	0	0	0	0	0	0	0	0	0	0
193	Guangzhou	Adelaide	0	0	0	0	0	0	0	0	0	0	0	0	0	0	0	0	0	0	0	0	0	0	0	0	0	0	0	0	0	0	0	0	0	0	0	0	0	0	0	0	0	0	0	0	0	0	0
194	Guangzhou	Brisbane	0	0	0	0	0	0	0	0	0	0	0	0	0	0	0	0	0	0	0	0	0	0	0	0	0	0	0	0	0	0	0	0	0	0	0	0	0	0	0	0	0	0	0	0	0	0	0
195	Guangzhou	Melbourne	0	0	0	0	0	0	0	0	0	0	0	0	0	0	0	0	0	0	0	0	0	0	0	0	0	0	0	0	0	0	0	0	0	0	0	0	0	0	0	0	0	0	0	0	0	0	0
196	Guangzhou	Perth	0	0	0	0	0	0	0	0	0	0	0	0	0	0	0	0	0	0	0	0	0	0	0	0	0	0	0	0	0	0	0	0	0	0	0	0	0	0	0	0	0	0	0	0	0	0	0
197	Guangzhou	Saipan	0	0	0	0	0	0	0	0	0	0	0	0	0	0	0	0	0	0	0	0	0	0	0	0	0	0	0	0	0	0	0	0	0	0	0	0	0	0	0	0	0	0	0	0	0	0	0
198	Guangzhou	Frankfurt	0	0	0	0	0	0	0	0	0	0	0	0	0	0	0	0	0	0	0	0	0	0	0	0	0	0	0	0	0	0	0	0	0	0	0	0	0	0	0	0	0	0	0	0	0	0	0
199	Guangzhou	Novosibirsk	0	0	0	0	0	0	0	0	0	0	0	0	0	0	0	0	0	0	0	0	0	0	0	0	0	0	0	0	0	0	0	0	0	0	0	0	0	0	0	0	0	0	0	0	0	0	0
200	Guangzhou	Moscow	0	0	0	0	0	0	0	0	0	0	0	0	0	0	0	0	0	0	0	0	0	0	0	0	0	0	0	0	0	0	0	0	0	0	0	0	0	0	0	0	0	0	0	0	0	0	0
201	Guangzhou	Paris	0	0	0	0	0	0	0	0	0	0	0	0	0	0	0	0	0	0	0	0	0	0	0	0	0	0	0	0	0	0	0	0	0	0	0	0	0	0	0	0	0	0	0	0	0	0	0
202	Guangzhou	Manila	0	0	0	0	0	0	0	0	0	0	0	0	0	0	0	0	0	0	0	0	0	0	0	0	0	0	0	0	0	0	0	0	0	0	0	0	0	0	0	0	0	0	0	0	0	0	0
203	Guangzhou	Helsinki	0	0	0	0	0	0	0	0	0	0	0	0	0	0	0	0	0	0	0	0	0	0	0	0	0	0	0	0	0	0	0	0	0	0	0	0	0	0	0	0	0	0	0	0	0	0	0
204	Guangzhou	Busan	0	0	0	0	0	0	0	0	0	0	0	0	0	0	0	0	0	0	0	0	0	0	0	0	0	0	0	0	0	0	0	0	0	0	0	0	0	0	0	0	0	0	0	0	0	0	0
205	Guangzhou	Seoul	0	0	0	0	0	0	0	0	0	0	0	0	0	0	0	0	0	0	0	0	0	0	0	0	0	0	0	0	0	0	0	0	0	0	0	0	0	0	0	0	0	0	0	0	0	0	0
206	Guangzhou	Amsterdam	0	0	0	0	0	0	0	0	0	0	0	0	0	0	0	0	0	0	0	0	0	0	0	0	0	0	0	0	0	0	0	0	0	0	0	0	0	0	0	0	0	0	0	0	0	0	0
207	Guangzhou	Bishkek	0	0	0	0	0	0	0	0	0	0	0	0	0	0	0	0	0	0	0	0	0	0	0	0	0	0	0	0	0	0	0	0	0	0	0	0	0	0	0	0	0	0	0	0	0	0	0
208	Guangzhou	Toronto	0	0	0	0	0	0	0	0	0	0	0	0	0	0	0	0	0	0	0	0	0	0	0	0	0	0	0	0	0	0	0	0	0	0	0	0	0	0	0	0	0	0	0	0	0	0	0
209	Guangzhou	Vancouver	0	0	0	0	0	0	0	0	0	0	0	0	0	0	0	0	0	0	0	0	0	0	0	0	0	0	0	0	0	0	0	0	0	0	0	0	0	0	0	0	0	0	0	0	0	0	0
210	Guangzhou	Phnom Penh	0	0	0	0	0	0	0	0	0	0	0	0	0	0	0	0	0	0	0	0	0	0	0	0	0	0	0	0	0	0	0	0	0	0	0	0	0	0	0	0	0	0	0	0	0	0	0
211	Guangzhou	Siem Reap	0	0	0	0	0	0	0	0	0	0	0	0	0	0	0	0	0	0	0	0	0	0	0	0	0	0	0	0	0	0	0	0	0	0	0	0	0	0	0	0	0	0	0	0	0	0	0
212	Guangzhou	Nairobi	0	0	0	0	0	0	0	0	0	0	0	0	0	0	0	0	0	0	0	0	0	0	0	0	0	0	0	0	0	0	0	0	0	0	0	0	0	0	0	0	0	0	0	0	0	0	0
213	Guangzhou	Vientiane	0	0	0	0	0	0	0	0	0	0	0	0	0	0	0	0	0	0	0	0	0	0	0	0	0	0	0	0	0	0	0	0	0	0	0	0	0	0	0	0	0	0	0	0	0	0	0
214	Guangzhou	Male	0	0	0	0	0	0	0	0	0	0	0	0	0	0	0	0	0	0	0	0	0	0	0	0	0	0	0	0	0	0	0	0	0	0	0	0	0	0	0	0	0	0	0	0	0	0	0
215	Guangzhou	Sabah	0	0	0	0	0	0	0	0	0	0	0	0	0	0	0	0	0	0	0	0	0	0	0	0	0	0	0	0	0	0	0	0	0	0	0	0	0	0	0	0	0	0	0	0	0	0	0
216	Guangzhou	Langkawi	0	0	0	0	0	0	0	0	0	0	0	0	0	0	0	0	0	0	0	0	0	0	0	0	0	0	0	0	0	0	0	0	0	0	0	0	0	0	0	0	0	0	0	0	0	0	0
217	Guangzhou	Kuala Lumpur	0	0	0	0	0	0	0	0	0	0	0	0	0	0	0	0	0	0	0	0	0	0	0	0	0	0	0	0	0	0	0	0	0	0	0	0	0	0	0	0	0	0	0	0	0	0	0
218	Guangzhou	Penang	0	0	0	0	0	0	0	0	0	0	0	0	0	0	0	0	0	0	0	0	0	0	0	0	0	0	0	0	0	0	0	0	0	0	0	0	0	0	0	0	0	0	0	0	0	0	0
219	Guangzhou	Anchorage	0	0	0	0	0	0	0	0	0	0	0	0	0	0	0	0	0	0	0	0	0	0	0	0	0	0	0	0	0	0	0	0	0	0	0	0	0	0	0	0	0	0	0	0	0	0	0
220	Guangzhou	Los Angeles	0	0	0	0	0	0	0	0	0	0	0	0	0	0	0	0	0	0	0	0	0	0	0	0	0	0	0	0	0	0	0	0	0	0	0	0	0	0	0	0	0	0	0	0	0	0	0
221	Guangzhou	New York	0	0	0	0	0	0	0	0	0	0	0	0	0	0	0	0	0	0	0	0	0	0	0	0	0	0	0	0	0	0	0	0	0	0	0	0	0	0	0	0	0	0	0	0	0	0	0
222	Guangzhou	San Francisco	0	0	0	0	0	0	0	0	0	0	0	0	0	0	0	0	0	0	0	0	0	0	0	0	0	0	0	0	0	0	0	0	0	0	0	0	0	0	0	0	0	0	0	0	0	0	0
223	Guangzhou	Dacca	0	0	0	0	0	0	0	0	0	0	0	0	0	0	0	0	0	0	0	0	0	0	0	0	0	0	0	0	0	0	0	0	0	0	0	0	0	0	0	0	0	0	0	0	0	0	0
224	Guangzhou	Mandalay	0	0	0	0	0	0	0	0	0	0	0	0	0	0	0	0	0	0	0	0	0	0	0	0	3524.08	14.257	1.04019	12.2928	0.223005	4.31998	16618.1	133.227	9.75768	107.039	1.6971	20.3713	0	0	0	0	0	0	0	0	0	0	0
225	Guangzhou	Rangoon	0	0	0	0	0	0	0	0	0	0	0	0	0	0	0	0	0	0	0	0	0	0	0	0	0	0	0	0	0	0	0	0	0	0	0	0	0	0	0	0	0	0	0	0	0	0	0
226	Guangzhou	Mexico City	0	0	0	0	0	0	0	0	0	0	0	0	0	0	0	0	0	0	0	0	0	0	0	0	0	0	0	0	0	0	0	0	0	0	0	0	0	0	0	0	0	0	0	0	0	0	0
227	Guangzhou	Katmandu	0	0	0	0	0	0	0	0	0	0	0	0	0	0	0	0	0	0	0	0	0	0	0	0	0	0	0	0	0	0	0	0	0	0	0	0	0	0	0	0	0	0	0	0	0	0	0
228	Guangzhou	Nagoya	0	0	0	0	0	0	0	0	0	0	0	0	0	0	0	0	0	0	0	0	0	0	0	0	0	0	0	0	0	0	0	0	0	0	0	0	0	0	0	0	0	0	0	0	0	0	0
229	Guangzhou	Osaka	0	0	0	0	0	0	0	0	0	0	0	0	0	0	0	0	0	0	0	0	0	0	0	0	0	0	0	0	0	0	0	0	0	0	0	0	0	0	0	0	0	0	0	0	0	0	0
230	Guangzhou	Tokyo	0	0	0	0	0	0	0	0	0	0	0	0	7815.61	28.3326	4.84989	36.1919	0.504724	9.58074	70158.8	491.181	84.5938	578.148	6.33996	86.004	0	0	0	0	0	0	0	0	0	0	0	0	0	0	0	0	0	0	0	0	0	0	0
231	Guangzhou	Colombo	0	0	0	0	0	0	0	0	0	0	0	0	0	0	0	0	0	0	0	0	0	0	0	0	0	0	0	0	0	0	0	0	0	0	0	0	0	0	0	0	0	0	0	0	0	0	0
232	Guangzhou	Bangkok	0	0	0	0	0	0	0	0	0	0	0	0	0	0	0	0	0	0	0	0	0	0	0	0	0	0	0	0	0	0	0	0	0	0	0	0	0	0	0	0	0	0	0	0	0	0	0
233	Guangzhou	Chiang Mai	0	0	0	0	0	0	0	0	0	0	0	0	0	0	0	0	0	0	0	0	0	0	0	0	0	0	0	0	0	0	0	0	0	0	0	0	0	0	0	0	0	0	0	0	0	0	0
234	Guangzhou	Krabi	0	0	0	0	0	0	0	0	0	0	0	0	0	0	0	0	0	0	0	0	0	0	0	0	881.019	3.56426	0.260047	3.0732	0.0557511	1.08	7547.09	60.505	4.43144	48.6117	0.770735	9.25158	0	0	0	0	0	0	0	0	0	0	0
235	Guangzhou	Phuket	0	0	0	0	0	0	0	0	0	0	0	0	0	0	0	0	0	0	0	0	0	0	0	0	0	0	0	0	0	0	0	0	0	0	0	0	0	0	0	0	0	0	0	0	0	0	0
236	Guangzhou	Istanbul	0	0	0	0	0	0	0	0	0	0	0	0	0	0	0	0	0	0	0	0	0	0	0	0	0	0	0	0	0	0	0	0	0	0	0	0	0	0	0	0	0	0	0	0	0	0	0
237	Guangzhou	Singapore	0	0	0	0	0	0	0	0	0	0	0	0	0	0	0	0	0	0	0	0	0	0	0	0	0	0	0	0	0	0	0	0	0	0	0	0	0	0	0	0	0	0	0	0	0	0	0
238	Guangzhou	Auckland	0	0	0	0	0	0	0	0	0	0	0	0	0	0	0	0	0	0	0	0	0	0	0	0	0	0	0	0	0	0	0	0	0	0	0	0	0	0	0	0	0	0	0	0	0	0	0
239	Guangzhou	Teheran	0	0	0	0	0	0	0	0	0	0	0	0	0	0	0	0	0	0	0	0	0	0	0	0	0	0	0	0	0	0	0	0	0	0	0	0	0	0	0	0	0	0	0	0	0	0	0
240	Guangzhou	Rome	0	0	0	0	0	0	0	0	0	0	0	0	0	0	0	0	0	0	0	0	0	0	0	0	0	0	0	0	0	0	0	0	0	0	0	0	0	0	0	0	0	0	0	0	0	0	0
241	Guangzhou	Mumbai	0	0	0	0	0	0	0	0	0	0	0	0	0	0	0	0	0	0	0	0	0	0	0	0	0	0	0	0	0	0	0	0	0	0	0	0	0	0	0	0	0	0	0	0	0	0	0
242	Guangzhou	New Delhi	0	0	0	0	0	0	0	0	0	0	0	0	0	0	0	0	0	0	0	0	0	0	0	0	0	0	0	0	0	0	0	0	0	0	0	0	0	0	0	0	0	0	0	0	0	0	0
243	Guangzhou	Bali	0	0	0	0	0	0	0	0	0	0	0	0	0	0	0	0	0	0	0	0	0	0	0	0	0	0	0	0	0	0	0	0	0	0	0	0	0	0	0	0	0	0	0	0	0	0	0
244	Guangzhou	Jakarta	0	0	0	0	0	0	0	0	0	0	0	0	0	0	0	0	0	0	0	0	0	0	0	0	0	0	0	0	0	0	0	0	0	0	0	0	0	0	0	0	0	0	0	0	0	0	0
245	Guangzhou	London	0	0	0	0	0	0	0	0	0	0	0	0	0	0	0	0	0	0	0	0	0	0	0	0	0	0	0	0	0	0	0	0	0	0	0	0	0	0	0	0	0	0	0	0	0	0	0
246	Guangzhou	Da Nang	0	0	0	0	0	0	0	0	0	0	0	0	0	0	0	0	0	0	0	0	0	0	0	0	0	0	0	0	0	0	0	0	0	0	0	0	0	0	0	0	0	0	0	0	0	0	0
247	Guangzhou	Hanoi	0	0	0	0	0	0	0	0	0	0	0	0	0	0	0	0	0	0	0	0	0	0	0	0	0	0	0	0	0	0	0	0	0	0	0	0	0	0	0	0	0	0	0	0	0	0	0
248	Guangzhou	Phu Quoc Island	0	0	0	0	0	0	0	0	0	0	0	0	0	0	0	0	0	0	0	0	0	0	0	0	0	0	0	0	0	0	0	0	0	0	0	0	0	0	0	0	0	0	0	0	0	0	0
249	Guangzhou	Ho Chi Minh City	0	0	0	0	0	0	0	0	0	0	0	0	0	0	0	0	0	0	0	0	0	0	0	0	0	0	0	0	0	0	0	0	0	0	0	0	0	0	0	0	0	0	0	0	0	0	0
250	Guangzhou	Nha Trang	0	0	0	0	0	0	0	0	0	0	0	0	0	0	0	0	0	0	0	0	0	0	0	0	0	0	0	0	0	0	0	0	0	0	0	0	0	0	0	0	0	0	0	0	0	0	0
251	Changchun	Jeju	0	0	0	0	0	0	0	0	0	0	0	0	0	0	0	0	0	0	0	0	0	0	0	0	0	0	0	0	0	0	0	0	0	0	0	0	0	0	0	0	0	0	0	0	0	0	0
252	Changchun	Seoul	0	0	0	0	0	0	0	0	0	0	0	0	0	0	0	0	0	0	0	0	0	0	0	0	0	0	0	0	0	0	0	0	0	0	0	0	0	0	0	0	0	0	0	0	0	0	0
253	Changchun	Jeju	0	0	0	0	0	0	0	0	0	0	0	0	0	0	0	0	0	0	0	0	0	0	0	0	0	0	0	0	0	0	0	0	0	0	0	0	0	0	0	0	0	0	0	0	0	0	0
254	Changchun	Tokyo	0	0	0	0	0	0	0	0	0	0	0	0	0	0	0	0	0	0	0	0	0	0	0	0	0	0	0	0	0	0	0	0	0	0	0	0	0	0	0	0	0	0	0	0	0	0	0
255	Changsha	Frankfurt	0	0	0	0	0	0	0	0	0	0	0	0	0	0	0	0	0	0	0	0	0	0	0	0	0	0	0	0	0	0	0	0	0	0	0	0	0	0	0	0	0	0	0	0	0	0	0
256	Changsha	Jeju	0	0	0	0	0	0	0	0	0	0	0	0	0	0	0	0	0	0	0	0	0	0	0	0	0	0	0	0	0	0	0	0	0	0	0	0	0	0	0	0	0	0	0	0	0	0	0
257	Changsha	Seoul	0	0	0	0	0	0	0	0	0	0	0	0	0	0	0	0	0	0	0	0	0	0	0	0	1443.34	3.98684	0.611949	8.00539	0.0875583	1.76932	8473.2	49.2146	7.56869	86.8157	0.668947	10.3869	0	0	0	0	0	0	0	0	0	0	0
258	Changsha	Bangkok	0	0	0	0	0	0	0	0	0	0	0	0	0	0	0	0	0	0	0	0	0	0	0	0	0	0	0	0	0	0	0	0	0	0	0	0	0	0	0	0	0	0	0	0	0	0	0
259	Changsha	Phuket	0	0	0	0	0	0	0	0	0	0	0	0	0	0	0	0	0	0	0	0	0	0	0	0	0	0	0	0	0	0	0	0	0	0	0	0	0	0	0	0	0	0	0	0	0	0	0
260	Changsha	Da Nang	0	0	0	0	0	0	0	0	0	0	0	0	0	0	0	0	0	0	0	0	0	0	0	0	0	0	0	0	0	0	0	0	0	0	0	0	0	0	0	0	0	0	0	0	0	0	0
261	Chengdu	Melbourne	0	0	0	0	0	0	0	0	0	0	0	0	0	0	0	0	0	0	0	0	0	0	0	0	0	0	0	0	0	0	0	0	0	0	0	0	0	0	0	0	0	0	0	0	0	0	0
262	Chengdu	Sydney	0	0	0	0	0	0	0	0	0	0	0	0	0	0	0	0	0	0	0	0	0	0	0	0	0	0	0	0	0	0	0	0	0	0	0	0	1315.34	3.98684	0.611949	8.00539	0.0875583	1.61241	38363.5	222.825	34.2682	393.069	3.02874
263	Chengdu	Frankfurt	0	0	0	0	0	0	0	0	0	0	0	0	0	0	0	0	0	0	0	0	0	0	0	0	0	0	0	0	0	0	0	0	0	0	0	0	2165.02	5.98026	0.917923	12.0081	0.131337	2.65398	54672.8	317.554	48.8365	560.172	4.31633
264	Chengdu	Seoul	0	0	0	0	0	0	0	0	0	0	0	0	0	0	0	0	0	0	0	0	0	0	0	0	0	0	0	0	0	0	0	0	0	0	0	0	0	0	0	0	0	0	0	0	0	0	0
265	Chengdu	Siem Reap	0	0	0	0	0	0	0	0	0	0	0	0	0	0	0	0	0	0	0	0	0	0	0	0	0	0	0	0	0	0	0	0	0	0	0	0	0	0	0	0	0	0	0	0	0	0	0
266	Chengdu	Male	0	0	0	0	0	0	0	0	0	0	0	0	0	0	0	0	0	0	0	0	0	0	0	0	0	0	0	0	0	0	0	0	0	0	0	0	0	0	0	0	0	0	0	0	0	0	0
267	Chengdu	Katmandu	0	0	0	0	0	0	0	0	0	0	0	0	0	0	0	0	0	0	0	0	0	0	0	0	0	0	0	0	0	0	0	0	0	0	0	0	6111.83	17.1623	1.54468	17.5377	0.289197	7.49217	29866.8	226.133	20.647	188.317	2.82941
268	Chengdu	Krabi	0	0	0	0	0	0	0	0	0	0	0	0	0	0	0	0	0	0	0	0	0	0	0	0	0	0	0	0	0	0	0	0	0	0	0	0	0	0	0	0	0	0	0	0	0	0	0
269	Chengdu	Bangkok	0	0	0	0	0	0	0	0	0	0	0	0	0	0	0	0	0	0	0	0	0	0	0	0	2037.28	8.84566	0.937904	7.67274	0.126524	2.49739	17529.8	153.026	16.1749	121.549	1.82625	21.4888	0	0	0	0	0	0	0	0	0	0	0
270	Chengdu	Phuket	0	0	0	0	0	0	0	0	0	0	0	0	0	0	0	0	0	0	0	0	0	0	0	0	2037.28	8.84566	0.937904	7.67274	0.126524	2.49739	20235.4	176.645	18.6714	140.309	2.10812	24.8055	0	0	0	0	0	0	0	0	0	0	0
271	Chengdu	Chiang Mai	0	0	0	0	0	0	0	0	0	0	0	0	0	0	0	0	0	0	0	0	0	0	0	0	0	0	0	0	0	0	0	0	0	0	0	0	0	0	0	0	0	0	0	0	0	0	0
272	Chengdu	Surat Thani	0	0	0	0	0	0	0	0	0	0	0	0	0	0	0	0	0	0	0	0	0	0	0	0	0	0	0	0	0	0	0	0	0	0	0	0	0	0	0	0	0	0	0	0	0	0	0
273	Chengdu	Singapore	0	0	0	0	0	0	0	0	0	0	0	0	0	0	0	0	0	0	0	0	0	0	0	0	0	0	0	0	0	0	0	0	0	0	0	0	2037.28	8.84566	0.937904	7.67274	0.126524	2.49739	25256.1	220.473	23.3041	175.122	2.63117
274	Dalian	Seoul	0	0	0	0	0	0	0	0	0	0	0	0	0	0	0	0	0	0	0	0	0	0	0	0	0	0	0	0	0	0	0	0	0	0	0	0	0	0	0	0	0	0	0	0	0	0	0
275	Dalian	Osaka	0	0	0	0	0	0	0	0	0	0	0	0	3748.4	9.76375	0.92345	5.36813	0.114946	4.59497	9969.93	103.122	6.42227	54.4689	0.841566	12.2216	0	0	0	0	0	0	0	0	0	0	0	0	2055.71	8.3166	0.606776	7.17079	0.130086	2.51999	11634.3	93.2726	6.83136	74.9382	1.18814
276	Dalian	Tokyo	0	0	0	0	0	0	0	0	0	0	0	0	3898.48	6.20398	0.199509	24.5969	0.24966	4.77894	25178.4	112.103	2.88106	440.672	1.97749	30.8649	1174.69	4.75234	0.346729	4.09759	0.0743349	1.43999	7771.37	62.3031	4.56313	50.0563	0.793639	9.52651	0	0	0	0	0	0	0	0	0	0	0
277	Dalian	Fukuoka.	0	0	0	0	0	0	0	0	0	0	0	0	0	0	0	0	0	0	0	0	0	0	0	0	0	0	0	0	0	0	0	0	0	0	0	0	2055.71	8.3166	0.606776	7.17079	0.130086	2.51999	9705.5	77.809	5.6988	62.5142	0.99116
278	Dalian	Toyama	0	0	0	0	0	0	0	0	0	0	0	0	0	0	0	0	0	0	0	0	0	0	0	0	0	0	0	0	0	0	0	0	0	0	0	0	0	0	0	0	0	0	0	0	0	0	0
279	Dalian	Hiroshima	0	0	0	0	0	0	0	0	0	0	0	0	0	0	0	0	0	0	0	0	0	0	0	0	0	0	0	0	0	0	0	0	0	0	0	0	1468.37	5.94043	0.433411	5.12199	0.0929186	1.79999	7154.64	57.3588	4.201	46.0839	0.730657
280	Dalian	Nagoya	0	0	0	0	0	0	0	0	0	0	0	0	0	0	0	0	0	0	0	0	0	0	0	0	0	0	0	0	0	0	0	0	0	0	0	0	0	0	0	0	0	0	0	0	0	0	0
281	Fuzhou	Jeju	0	0	0	0	0	0	0	0	0	0	0	0	0	0	0	0	0	0	0	0	0	0	0	0	0	0	0	0	0	0	0	0	0	0	0	0	0	0	0	0	0	0	0	0	0	0	0
282	Fuzhou	Kuala Lumpur	0	0	0	0	0	0	0	0	0	0	0	0	0	0	0	0	0	0	0	0	0	0	0	0	0	0	0	0	0	0	0	0	0	0	0	0	0	0	0	0	0	0	0	0	0	0	0
283	Fuzhou	Osaka	0	0	0	0	0	0	0	0	0	0	0	0	0	0	0	0	0	0	0	0	0	0	0	0	0	0	0	0	0	0	0	0	0	0	0	0	0	0	0	0	0	0	0	0	0	0	0
284	Fuzhou	Bangkok	0	0	0	0	0	0	0	0	0	0	0	0	0	0	0	0	0	0	0	0	0	0	0	0	0	0	0	0	0	0	0	0	0	0	0	0	0	0	0	0	0	0	0	0	0	0	0
285	Fuzhou	Singapore	0	0	0	0	0	0	0	0	0	0	0	0	0	0	0	0	0	0	0	0	0	0	0	0	0	0	0	0	0	0	0	0	0	0	0	0	0	0	0	0	0	0	0	0	0	0	0
286	Fuzhou	Jakarta	0	0	0	0	0	0	0	0	0	0	0	0	0	0	0	0	0	0	0	0	0	0	0	0	0	0	0	0	0	0	0	0	0	0	0	0	0	0	0	0	0	0	0	0	0	0	0
287	Guiyang	Phuket	0	0	0	0	0	0	0	0	0	0	0	0	0	0	0	0	0	0	0	0	0	0	0	0	0	0	0	0	0	0	0	0	0	0	0	0	0	0	0	0	0	0	0	0	0	0	0
288	Guiyang	Bangkok	0	0	0	0	0	0	0	0	0	0	0	0	0	0	0	0	0	0	0	0	0	0	0	0	0	0	0	0	0	0	0	0	0	0	0	0	0	0	0	0	0	0	0	0	0	0	0
289	Guiyang	Singapore	0	0	0	0	0	0	0	0	0	0	0	0	0	0	0	0	0	0	0	0	0	0	0	0	0	0	0	0	0	0	0	0	0	0	0	0	0	0	0	0	0	0	0	0	0	0	0
290	Guilin	Seoul	0	0	0	0	0	0	0	0	0	0	0	0	0	0	0	0	0	0	0	0	0	0	0	0	0	0	0	0	0	0	0	0	0	0	0	0	0	0	0	0	0	0	0	0	0	0	0
291	Harbin	Osaka	0	0	0	0	0	0	0	0	0	0	0	0	0	0	0	0	0	0	0	0	0	0	0	0	0	0	0	0	0	0	0	0	0	0	0	0	0	0	0	0	0	0	0	0	0	0	0
292	Harbin	Niigata	0	0	0	0	0	0	0	0	0	0	0	0	0	0	0	0	0	0	0	0	0	0	0	0	0	0	0	0	0	0	0	0	0	0	0	0	0	0	0	0	0	0	0	0	0	0	0
293	Harbin	Tokyo	0	0	0	0	0	0	0	0	0	0	0	0	0	0	0	0	0	0	0	0	0	0	0	0	0	0	0	0	0	0	0	0	0	0	0	0	0	0	0	0	0	0	0	0	0	0	0
294	Harbin	Nagoya	0	0	0	0	0	0	0	0	0	0	0	0	0	0	0	0	0	0	0	0	0	0	0	0	0	0	0	0	0	0	0	0	0	0	0	0	0	0	0	0	0	0	0	0	0	0	0
295	Haikou	Singapore	0	0	0	0	0	0	0	0	0	0	0	0	0	0	0	0	0	0	0	0	0	0	0	0	0	0	0	0	0	0	0	0	0	0	0	0	0	0	0	0	0	0	0	0	0	0	0
296	Haikou	Bangkok	0	0	0	0	0	0	0	0	0	0	0	0	0	0	0	0	0	0	0	0	0	0	0	0	0	0	0	0	0	0	0	0	0	0	0	0	0	0	0	0	0	0	0	0	0	0	0
297	Hangzhou	Jeju	0	0	0	0	0	0	0	0	0	0	0	0	0	0	0	0	0	0	0	0	0	0	0	0	582.079	2.52733	0.267973	2.19221	0.0361496	0.71354	2045.21	17.8536	1.88714	14.1812	0.213069	2.50711	582.079	2.52733	0.267973	2.19221	0.0361496	0.71354	2090.09	18.2454	1.92855	14.4924	0.217745
298	Hangzhou	Cheongju	0	0	0	0	0	0	0	0	0	0	0	0	0	0	0	0	0	0	0	0	0	0	0	0	0	0	0	0	0	0	0	0	0	0	0	0	0	0	0	0	0	0	0	0	0	0	0
299	Hangzhou	Seoul	0	0	0	0	0	0	0	0	0	0	0	0	0	0	0	0	0	0	0	0	0	0	0	0	0	0	0	0	0	0	0	0	0	0	0	0	2037.28	8.84566	0.937904	7.67274	0.126524	2.49739	8764.89	76.513	8.08747	60.7745	0.913123
300	Hangzhou	Okinawa	0	0	0	0	0	0	0	0	0	0	0	0	0	0	0	0	0	0	0	0	0	0	0	0	582.079	2.52733	0.267973	2.19221	0.0361496	0.71354	2463.08	21.5014	2.27271	17.0786	0.256603	3.01936	0	0	0	0	0	0	0	0	0	0	0
301	Hangzhou	Bangkok	0	0	0	0	0	0	0	0	0	0	0	0	0	0	0	0	0	0	0	0	0	0	0	0	0	0	0	0	0	0	0	0	0	0	0	0	2910.39	12.6367	1.33986	10.9611	0.180748	3.5677	33492.5	292.372	30.9039	232.232	3.48923
302	Hangzhou	Phuket	0	0	0	0	0	0	0	0	0	0	0	0	0	0	0	0	0	0	0	0	0	0	0	0	1164.16	5.05466	0.535945	4.38442	0.0722992	1.42708	14883.6	129.927	13.7333	103.201	1.55057	18.2451	0	0	0	0	0	0	0	0	0	0	0
303	Hangzhou	Da Nang	0	0	0	0	0	0	0	0	0	0	0	0	0	0	0	0	0	0	0	0	0	0	0	0	0	0	0	0	0	0	0	0	0	0	0	0	0	0	0	0	0	0	0	0	0	0	0
304	Hefei	Seoul	0	0	0	0	0	0	0	0	0	0	0	0	0	0	0	0	0	0	0	0	0	0	0	0	0	0	0	0	0	0	0	0	0	0	0	0	0	0	0	0	0	0	0	0	0	0	0
305	Jinan	Osaka	0	0	0	0	0	0	0	0	0	0	0	0	0	0	0	0	0	0	0	0	0	0	0	0	0	0	0	0	0	0	0	0	0	0	0	0	0	0	0	0	0	0	0	0	0	0	0
306	Jinan	Bangkok	0	0	0	0	0	0	0	0	0	0	0	0	0	0	0	0	0	0	0	0	0	0	0	0	0	0	0	0	0	0	0	0	0	0	0	0	0	0	0	0	0	0	0	0	0	0	0
307	Jinan	Seoul	0	0	0	0	0	0	0	0	0	0	0	0	0	0	0	0	0	0	0	0	0	0	0	0	0	0	0	0	0	0	0	0	0	0	0	0	0	0	0	0	0	0	0	0	0	0	0
308	Kiamusze	Seoul	0	0	0	0	0	0	0	0	0	0	0	0	0	0	0	0	0	0	0	0	0	0	0	0	0	0	0	0	0	0	0	0	0	0	0	0	0	0	0	0	0	0	0	0	0	0	0
309	Jieyang	Bangkok	0	0	0	0	0	0	0	0	0	0	0	0	0	0	0	0	0	0	0	0	0	0	0	0	0	0	0	0	0	0	0	0	0	0	0	0	0	0	0	0	0	0	0	0	0	0	0
310	Kunming	Dubai	0	0	0	0	0	0	0	0	0	0	0	0	0	0	0	0	0	0	0	0	0	0	0	0	1973.01	5.98026	0.917923	12.0081	0.131337	2.41861	33560.2	194.927	29.9777	343.855	2.64953	41.1397	0	0	0	0	0	0	0	0	0	0	0
311	Kunming	Paris	0	0	0	0	0	0	0	0	0	0	0	0	0	0	0	0	0	0	0	0	0	0	0	0	1973.01	5.98026	0.917923	12.0081	0.131337	2.41861	56887.4	330.417	50.8147	582.863	4.49118	69.7353	0	0	0	0	0	0	0	0	0	0	0
312	Kunming	Seoul	0	0	0	0	0	0	0	0	0	0	0	0	0	0	0	0	0	0	0	0	0	0	0	0	587.346	2.37617	0.173365	2.0488	0.0371674	0.719997	5986.79	47.9961	3.51528	38.5616	0.611392	7.33889	0	0	0	0	0	0	0	0	0	0	0
313	Kunming	Siem Reap	0	0	0	0	0	0	0	0	0	0	0	0	0	0	0	0	0	0	0	0	0	0	0	0	1606.46	4.18446	0.395764	2.30063	0.0492625	1.96927	4191.66	43.3556	2.70011	22.9003	0.353819	5.13833	0	0	0	0	0	0	0	0	0	0	0
314	Kunming	Vientiane	0	0	0	0	0	0	0	0	0	0	0	0	0	0	0	0	0	0	0	0	0	0	0	0	5873.46	19.0094	1.90701	20.488	0.371674	7.19997	21189.3	163.785	14.1882	136.483	2.16392	25.9748	0	0	0	0	0	0	0	0	0	0	0
315	Kunming	Dacca	0	0	0	0	0	0	0	0	0	0	0	0	0	0	0	0	0	0	0	0	0	0	0	0	2055.71	8.3166	0.606776	7.17079	0.130086	2.51999	11139.3	89.3035	6.54066	71.7493	1.13758	13.655	0	0	0	0	0	0	0	0	0	0	0
316	Kunming	Mandalay	0	0	0	0	0	0	0	0	0	0	0	0	0	0	0	0	0	0	0	0	0	0	0	0	4111.42	16.6332	1.21355	14.3416	0.260172	5.03998	14781.9	118.507	8.67953	95.2121	1.50958	18.1204	0	0	0	0	0	0	0	0	0	0	0
317	Kunming	Naypyidaw	0	0	0	0	0	0	0	0	0	0	0	0	0	0	0	0	0	0	0	0	0	0	0	0	587.346	2.37617	0.173365	2.0488	0.0371674	0.719997	2559.05	20.5159	1.5026	16.4831	0.261339	3.13701	0	0	0	0	0	0	0	0	0	0	0
318	Kunming	Rangoon	0	0	0	0	0	0	0	0	0	0	0	0	0	0	0	0	0	0	0	0	0	0	0	0	5579.79	23.4806	2.48258	19.4636	0.353091	6.83997	26432.3	317.276	30.0168	170.253	2.69935	32.4019	2037.28	8.84566	0.937904	7.67274	0.126524	2.49739	8569.06	74.8035	7.90677	59.4166	0.892721
319	Kunming	Katmandu	0	0	0	0	0	0	0	0	0	0	0	0	0	0	0	0	0	0	0	0	0	0	0	0	7496.8	19.5275	1.8469	10.7363	0.229892	9.18994	27514.3	284.589	17.7237	150.319	2.32249	33.7283	0	0	0	0	0	0	0	0	0	0	0
320	Kunming	Colombo	0	0	0	0	0	0	0	0	0	0	0	0	0	0	0	0	0	0	0	0	0	0	0	0	881.019	3.56426	0.260047	3.0732	0.0557511	1.08	10415.4	83.5	6.11561	67.0866	1.06365	12.7676	0	0	0	0	0	0	0	0	0	0	0
321	Kunming	Krabi	0	0	0	0	0	0	0	0	0	0	0	0	0	0	0	0	0	0	0	0	0	0	0	0	0	0	0	0	0	0	0	0	0	0	0	0	0	0	0	0	0	0	0	0	0	0	0
322	Kunming	Bangkok	0	0	0	0	0	0	0	0	0	0	0	0	0	0	0	0	0	0	0	0	0	0	0	0	2055.71	8.3166	0.606776	7.17079	0.130086	2.51999	11157	82.0491	6.00934	65.9209	1.04517	13.6767	0	0	0	0	0	0	0	0	0	0	0
323	Kunming	Phuket	0	0	0	0	0	0	0	0	0	0	0	0	0	0	0	0	0	0	0	0	0	0	0	0	1164.16	5.05466	0.535945	4.38442	0.0722992	1.42708	9011.51	78.6659	8.31502	62.4845	0.938816	11.0467	0	0	0	0	0	0	0	0	0	0	0
324	Kunming	Chiang Rai	0	0	0	0	0	0	0	0	0	0	0	0	0	0	0	0	0	0	0	0	0	0	0	0	881.019	3.56426	0.260047	3.0732	0.0557511	1.08	2713.26	21.7522	1.59315	17.4764	0.277088	3.32604	0	0	0	0	0	0	0	0	0	0	0
325	Kunming	Chiang Mai	0	0	0	0	0	0	0	0	0	0	0	0	0	0	0	0	0	0	0	0	0	0	0	0	4111.42	16.6332	1.21355	14.3416	0.260172	5.03998	16571.3	132.852	9.73021	106.738	1.69232	20.3139	0	0	0	0	0	0	0	0	0	0	0
326	Kunming	Koh Samui	0	0	0	0	0	0	0	0	0	0	0	0	0	0	0	0	0	0	0	0	0	0	0	0	0	0	0	0	0	0	0	0	0	0	0	0	0	0	0	0	0	0	0	0	0	0	0
327	Kunming	Singapore	0	0	0	0	0	0	0	0	0	0	0	0	0	0	0	0	0	0	0	0	0	0	0	0	1164.16	5.05466	0.535945	4.38442	0.0722992	1.42708	11997.3	104.73	11.07	83.1875	1.24987	14.7069	0	0	0	0	0	0	0	0	0	0	0
328	Kunming	Calcutta	0	0	0	0	0	0	0	0	0	0	0	0	0	0	0	0	0	0	0	0	0	0	0	0	2055.71	8.3166	0.606776	7.17079	0.130086	2.51999	13075.4	104.825	7.67749	84.22	1.3353	16.0284	0	0	0	0	0	0	0	0	0	0	0
329	Kunming	New Delhi	0	0	0	0	0	0	0	0	0	0	0	0	0	0	0	0	0	0	0	0	0	0	0	0	0	0	0	0	0	0	0	0	0	0	0	0	0	0	0	0	0	0	0	0	0	0	0
330	Kunming	Hanoi	0	0	0	0	0	0	0	0	0	0	0	0	0	0	0	0	0	0	0	0	0	0	0	0	2677.43	6.97411	0.659607	3.83438	0.0821041	3.28212	5008.08	51.8002	3.22603	27.3607	0.422734	6.13914	0	0	0	0	0	0	0	0	0	0	0
331	Kunming	Da Nang	0	0	0	0	0	0	0	0	0	0	0	0	0	0	0	0	0	0	0	0	0	0	0	0	881.019	3.56426	0.260047	3.0732	0.0557511	1.08	4330.68	34.719	2.54285	27.8944	0.442264	5.30875	0	0	0	0	0	0	0	0	0	0	0
332	Kunming	Ho Chi Minh City	0	0	0	0	0	0	0	0	0	0	0	0	0	0	0	0	0	0	0	0	0	0	0	0	1606.46	4.18446	0.395764	2.30063	0.0492625	1.96927	5460.17	56.4763	3.51725	29.8306	0.460895	6.69334	0	0	0	0	0	0	0	0	0	0	0
333	Kunming	Nha Trang	0	0	0	0	0	0	0	0	0	0	0	0	0	0	0	0	0	0	0	0	0	0	0	0	0	0	0	0	0	0	0	0	0	0	0	0	0	0	0	0	0	0	0	0	0	0	0
334	Kunming	Katmandu	0	0	0	0	0	0	0	0	0	0	0	0	0	0	0	0	0	0	0	0	0	0	0	0	7496.8	19.5275	1.8469	10.7363	0.229892	9.18994	27514.3	284.589	17.7237	150.319	2.32249	33.7283	0	0	0	0	0	0	0	0	0	0	0
335	Kunming	Jakarta	0	0	0	0	0	0	0	0	0	0	0	0	0	0	0	0	0	0	0	0	0	0	0	0	0	0	0	0	0	0	0	0	0	0	0	0	0	0	0	0	0	0	0	0	0	0	0
336	Kunming	Bali	0	0	0	0	0	0	0	0	0	0	0	0	0	0	0	0	0	0	0	0	0	0	0	0	0	0	0	0	0	0	0	0	0	0	0	0	0	0	0	0	0	0	0	0	0	0	0
337	Lhasa	Katmandu	0	0	0	0	0	0	0	0	0	0	0	0	0	0	0	0	0	0	0	0	0	0	0	0	7496.8	19.5275	1.8469	10.7363	0.229892	9.18994	15543.5	160.771	10.0125	84.9188	1.31203	19.0539	0	0	0	0	0	0	0	0	0	0	0
338	Lanzhou	Bangkok	0	0	0	0	0	0	0	0	0	0	0	0	0	0	0	0	0	0	0	0	0	0	0	0	291.039	1.26367	0.133986	1.09611	0.0180748	0.35677	2853.35	24.9083	2.63282	19.7847	0.297261	3.49777	0	0	0	0	0	0	0	0	0	0	0
339	Manchuria	Irkutsk	0	0	0	0	0	0	0	0	0	0	0	0	0	0	0	0	0	0	0	0	0	0	0	0	0	0	0	0	0	0	0	0	0	0	0	0	0	0	0	0	0	0	0	0	0	0	0
340	Mudanjiang	Seoul	0	0	0	0	0	0	0	0	0	0	0	0	0	0	0	0	0	0	0	0	0	0	0	0	0	0	0	0	0	0	0	0	0	0	0	0	0	0	0	0	0	0	0	0	0	0	0
341	Nanchang	Bangkok	0	0	0	0	0	0	0	0	0	0	0	0	0	0	0	0	0	0	0	0	0	0	0	0	1164.16	5.05466	0.535945	4.38442	0.0722992	1.42708	11128.1	97.1425	10.268	77.1605	1.15932	13.6413	0	0	0	0	0	0	0	0	0	0	0
342	Nanjing	Sydney	0	0	0	0	0	0	0	0	0	0	0	0	0	0	0	0	0	0	0	0	0	0	0	0	1973.01	5.98026	0.917923	12.0081	0.131337	2.41861	51670.8	300.118	46.155	529.414	4.07933	63.3405	0	0	0	0	0	0	0	0	0	0	0
343	Nanjing	Jeju	0	0	0	0	0	0	0	0	0	0	0	0	0	0	0	0	0	0	0	0	0	0	0	0	582.079	2.52733	0.267973	2.19221	0.0361496	0.71354	2183.52	19.061	2.01476	15.1402	0.227478	2.67666	0	0	0	0	0	0	0	0	0	0	0
344	Nanjing	Seoul	0	0	0	0	0	0	0	0	0	0	0	0	0	0	0	0	0	0	0	0	0	0	0	0	2037.28	8.84566	0.937904	7.67274	0.126524	2.49739	10040.4	87.6473	9.26436	69.6185	1.046	12.308	0	0	0	0	0	0	0	0	0	0	0
345	Nanjing	Busan	0	0	0	0	0	0	0	0	0	0	0	0	0	0	0	0	0	0	0	0	0	0	0	0	2936.73	11.8809	0.866823	10.244	0.185837	3.59999	9690.22	77.6865	5.68982	62.4158	0.989599	11.8787	0	0	0	0	0	0	0	0	0	0	0
346	Nanjing	Osaka	0	0	0	0	0	0	0	0	0	0	0	0	0	0	0	0	0	0	0	0	0	0	0	0	1746.24	7.58199	0.803918	6.57663	0.108449	2.14062	11771.7	102.761	10.8619	81.6234	1.22637	14.4303	0	0	0	0	0	0	0	0	0	0	0
347	Nanjing	Tokyo	0	0	0	0	0	0	0	0	0	0	0	0	0	0	0	0	0	0	0	0	0	0	0	0	873.118	3.791	0.401959	3.28832	0.0542244	1.07031	6666.57	58.1958	6.15132	46.2251	0.694521	8.1722	0	0	0	0	0	0	0	0	0	0	0
348	Nanjing	Phuket	0	0	0	0	0	0	0	0	0	0	0	0	0	0	0	0	0	0	0	0	0	0	0	0	873.118	3.791	0.401959	3.28832	0.0542244	1.07031	11456.9	100.013	10.5714	79.4404	1.19357	14.0444	0	0	0	0	0	0	0	0	0	0	0
349	Nanjing	Da Nang	0	0	0	0	0	0	0	0	0	0	0	0	0	0	0	0	0	0	0	0	0	0	0	0	582.079	2.52733	0.267973	2.19221	0.0361496	0.71354	4977.97	43.4551	4.59323	34.5165	0.518603	6.10223	0	0	0	0	0	0	0	0	0	0	0
350	Nanning	Seoul	0	0	0	0	0	0	0	0	0	0	0	0	0	0	0	0	0	0	0	0	0	0	0	0	0	0	0	0	0	0	0	0	0	0	0	0	0	0	0	0	0	0	0	0	0	0	0
351	Nanning	Phnom Penh	0	0	0	0	0	0	0	0	0	0	0	0	0	0	0	0	0	0	0	0	0	0	0	0	587.346	2.37617	0.173365	2.0488	0.0371674	0.719997	3301.37	26.4671	1.93847	21.2645	0.337147	4.04697	0	0	0	0	0	0	0	0	0	0	0
352	Nanning	Vientiane	0	0	0	0	0	0	0	0	0	0	0	0	0	0	0	0	0	0	0	0	0	0	0	0	881.019	3.56426	0.260047	3.0732	0.0557511	1.08	3367.61	26.9981	1.97737	21.6912	0.343912	4.12818	0	0	0	0	0	0	0	0	0	0	0
353	Nanning	Rangoon	0	0	0	0	0	0	0	0	0	0	0	0	0	0	0	0	0	0	0	0	0	0	0	0	293.673	1.18809	0.0866823	1.0244	0.0185837	0.359998	1812.34	14.5295	1.06416	11.6735	0.185083	2.22165	0	0	0	0	0	0	0	0	0	0	0
354	Nanning	Phuket	0	0	0	0	0	0	0	0	0	0	0	0	0	0	0	0	0	0	0	0	0	0	0	0	0	0	0	0	0	0	0	0	0	0	0	0	0	0	0	0	0	0	0	0	0	0	0
355	Nanning	Chiang Mai	0	0	0	0	0	0	0	0	0	0	0	0	0	0	0	0	0	0	0	0	0	0	0	0	0	0	0	0	0	0	0	0	0	0	0	0	0	0	0	0	0	0	0	0	0	0	0
356	Nanning	Bangkok	0	0	0	0	0	0	0	0	0	0	0	0	0	0	0	0	0	0	0	0	0	0	0	0	0	0	0	0	0	0	0	0	0	0	0	0	0	0	0	0	0	0	0	0	0	0	0
357	Nanning	Singapore	0	0	0	0	0	0	0	0	0	0	0	0	0	0	0	0	0	0	0	0	0	0	0	0	0	0	0	0	0	0	0	0	0	0	0	0	0	0	0	0	0	0	0	0	0	0	0
358	Nanning	Jakarta	0	0	0	0	0	0	0	0	0	0	0	0	0	0	0	0	0	0	0	0	0	0	0	0	0	0	0	0	0	0	0	0	0	0	0	0	0	0	0	0	0	0	0	0	0	0	0
359	Nanning	Hanoi	0	0	0	0	0	0	0	0	0	0	0	0	0	0	0	0	0	0	0	0	0	0	0	0	1070.97	2.78964	0.263843	1.53375	0.0328417	1.31285	1084.04	11.2126	0.698302	5.92248	0.0915046	1.32887	0	0	0	0	0	0	0	0	0	0	0
360	Nanning	Ho Chi Minh City	0	0	0	0	0	0	0	0	0	0	0	0	0	0	0	0	0	0	0	0	0	0	0	0	0	0	0	0	0	0	0	0	0	0	0	0	0	0	0	0	0	0	0	0	0	0	0
361	Ningbo	Jeju	0	0	0	0	0	0	0	0	0	0	0	0	0	0	0	0	0	0	0	0	0	0	0	0	0	0	0	0	0	0	0	0	0	0	0	0	0	0	0	0	0	0	0	0	0	0	0
362	Ningbo	Bangkok	0	0	0	0	0	0	0	0	0	0	0	0	0	0	0	0	0	0	0	0	0	0	0	0	873.118	3.791	0.401959	3.28832	0.0542244	1.07031	9514.59	83.0575	8.77922	65.9728	0.991226	11.6634	0	0	0	0	0	0	0	0	0	0	0
363	Qingdao	Seoul	0	0	0	0	0	0	0	0	0	0	0	0	0	0	0	0	0	0	0	0	0	0	0	0	10204.8	43.6992	4.35839	37.8617	0.63618	12.5095	30246.2	260.086	26.0493	206.993	3.13965	37.0773	0	0	0	0	0	0	0	0	0	0	0
364	Qingdao	Busan	0	0	0	0	0	0	0	0	0	0	0	0	0	0	0	0	0	0	0	0	0	0	0	0	0	0	0	0	0	0	0	0	0	0	0	0	0	0	0	0	0	0	0	0	0	0	0
365	Qingdao	Osaka	0	0	0	0	0	0	0	0	0	0	0	0	3748.4	9.76375	0.92345	5.36813	0.114946	4.59497	10363.9	107.197	6.67604	56.6211	0.874819	12.7045	2037.28	8.84566	0.937904	7.67274	0.126524	2.49739	12631.2	110.264	11.6549	87.5826	1.31591	15.4839	0	0	0	0	0	0	0	0	0	0	0
366	Qingdao	Tokyo	0	0	0	0	0	0	0	0	0	0	0	0	3907.8	14.1663	2.42494	18.0959	0.252362	4.79037	26006.5	182.071	31.3572	214.308	2.3501	31.88	0	0	0	0	0	0	0	0	0	0	0	0	0	0	0	0	0	0	0	0	0	0	0
367	Qingdao	Fukuoka	0	0	0	0	0	0	0	0	0	0	0	0	0	0	0	0	0	0	0	0	0	0	0	0	2037.28	8.84566	0.937904	7.67274	0.126524	2.49739	11740	102.485	10.8327	81.4037	1.22307	14.3915	0	0	0	0	0	0	0	0	0	0	0
368	Qingdao	Nagoya	0	0	0	0	0	0	0	0	0	0	0	0	0	0	0	0	0	0	0	0	0	0	0	0	2037.28	8.84566	0.937904	7.67274	0.126524	2.49739	13831.5	120.742	12.7625	95.9055	1.44096	16.9553	0	0	0	0	0	0	0	0	0	0	0
369	Qingdao	Bangkok	0	0	0	0	0	0	0	0	0	0	0	0	0	0	0	0	0	0	0	0	0	0	0	0	0	0	0	0	0	0	0	0	0	0	0	0	0	0	0	0	0	0	0	0	0	0	0
370	Shenzhen	Jeju	0	0	0	0	0	0	0	0	0	0	0	0	0	0	0	0	0	0	0	0	0	0	0	0	0	0	0	0	0	0	0	0	0	0	0	0	0	0	0	0	0	0	0	0	0	0	0
371	Shenzhen	Seoul	0	0	0	0	0	0	0	0	0	0	0	0	0	0	0	0	0	0	0	0	0	0	0	0	0	0	0	0	0	0	0	0	0	0	0	0	0	0	0	0	0	0	0	0	0	0	0
372	Shenzhen	Sabah	0	0	0	0	0	0	0	0	0	0	0	0	0	0	0	0	0	0	0	0	0	0	0	0	0	0	0	0	0	0	0	0	0	0	0	0	0	0	0	0	0	0	0	0	0	0	0
373	Shenzhen	Tokyo	0	0	0	0	0	0	0	0	0	0	0	0	0	0	0	0	0	0	0	0	0	0	0	0	0	0	0	0	0	0	0	0	0	0	0	0	0	0	0	0	0	0	0	0	0	0	0
374	Shenzhen	Osaka	0	0	0	0	0	0	0	0	0	0	0	0	0	0	0	0	0	0	0	0	0	0	0	0	0	0	0	0	0	0	0	0	0	0	0	0	0	0	0	0	0	0	0	0	0	0	0
375	Shenzhen	Bangkok	0	0	0	0	0	0	0	0	0	0	0	0	0	0	0	0	0	0	0	0	0	0	0	0	0	0	0	0	0	0	0	0	0	0	0	0	0	0	0	0	0	0	0	0	0	0	0
376	Shenzhen	Phuket	0	0	0	0	0	0	0	0	0	0	0	0	0	0	0	0	0	0	0	0	0	0	0	0	0	0	0	0	0	0	0	0	0	0	0	0	0	0	0	0	0	0	0	0	0	0	0
377	Shenzhen	Chiang Mai	0	0	0	0	0	0	0	0	0	0	0	0	0	0	0	0	0	0	0	0	0	0	0	0	0	0	0	0	0	0	0	0	0	0	0	0	0	0	0	0	0	0	0	0	0	0	0
378	Shenzhen	Singapore	0	0	0	0	0	0	0	0	0	0	0	0	0	0	0	0	0	0	0	0	0	0	0	0	0	0	0	0	0	0	0	0	0	0	0	0	0	0	0	0	0	0	0	0	0	0	0
379	Shenzhen	Bali	0	0	0	0	0	0	0	0	0	0	0	0	0	0	0	0	0	0	0	0	0	0	0	0	0	0	0	0	0	0	0	0	0	0	0	0	0	0	0	0	0	0	0	0	0	0	0
380	Shenzhen	Jakarta	0	0	0	0	0	0	0	0	0	0	0	0	0	0	0	0	0	0	0	0	0	0	0	0	0	0	0	0	0	0	0	0	0	0	0	0	0	0	0	0	0	0	0	0	0	0	0
381	Shenzhen	Ho Chi Minh City	0	0	0	0	0	0	0	0	0	0	0	0	0	0	0	0	0	0	0	0	0	0	0	0	0	0	0	0	0	0	0	0	0	0	0	0	0	0	0	0	0	0	0	0	0	0	0
382	Shenzhen	Nha Trang	0	0	0	0	0	0	0	0	0	0	0	0	0	0	0	0	0	0	0	0	0	0	0	0	0	0	0	0	0	0	0	0	0	0	0	0	0	0	0	0	0	0	0	0	0	0	0
383	Shenzhen	Da Nang	0	0	0	0	0	0	0	0	0	0	0	0	0	0	0	0	0	0	0	0	0	0	0	0	0	0	0	0	0	0	0	0	0	0	0	0	0	0	0	0	0	0	0	0	0	0	0
384	Shenyang	Moscow	0	0	0	0	0	0	0	0	0	0	0	0	0	0	0	0	0	0	0	0	0	0	0	0	0	0	0	0	0	0	0	0	0	0	0	0	0	0	0	0	0	0	0	0	0	0	0
385	Shenyang	Busan	0	0	0	0	0	0	0	0	0	0	0	0	0	0	0	0	0	0	0	0	0	0	0	0	0	0	0	0	0	0	0	0	0	0	0	0	0	0	0	0	0	0	0	0	0	0	0
386	Shenyang	Jeju	0	0	0	0	0	0	0	0	0	0	0	0	0	0	0	0	0	0	0	0	0	0	0	0	0	0	0	0	0	0	0	0	0	0	0	0	0	0	0	0	0	0	0	0	0	0	0
387	Shenyang	Cheongju	0	0	0	0	0	0	0	0	0	0	0	0	0	0	0	0	0	0	0	0	0	0	0	0	0	0	0	0	0	0	0	0	0	0	0	0	0	0	0	0	0	0	0	0	0	0	0
388	Shenyang	Seoul	0	0	0	0	0	0	0	0	0	0	0	0	0	0	0	0	0	0	0	0	0	0	0	0	0	0	0	0	0	0	0	0	0	0	0	0	0	0	0	0	0	0	0	0	0	0	0
389	Shenyang	Osaka	0	0	0	0	0	0	0	0	0	0	0	0	0	0	0	0	0	0	0	0	0	0	0	0	0	0	0	0	0	0	0	0	0	0	0	0	0	0	0	0	0	0	0	0	0	0	0
390	Shenyang	Tokyo	0	0	0	0	0	0	0	0	0	0	0	0	3907.8	14.1663	2.42494	18.0959	0.252362	4.79037	23201.3	162.432	27.9749	191.192	2.0966	28.4412	0	0	0	0	0	0	0	0	0	0	0	0	0	0	0	0	0	0	0	0	0	0	0
391	Shenyang	Nagoya	0	0	0	0	0	0	0	0	0	0	0	0	0	0	0	0	0	0	0	0	0	0	0	0	0	0	0	0	0	0	0	0	0	0	0	0	0	0	0	0	0	0	0	0	0	0	0
392	Shijiazhuang	Seoul	0	0	0	0	0	0	0	0	0	0	0	0	0	0	0	0	0	0	0	0	0	0	0	0	0	0	0	0	0	0	0	0	0	0	0	0	0	0	0	0	0	0	0	0	0	0	0
393	Shijiazhuang	Busan	0	0	0	0	0	0	0	0	0	0	0	0	0	0	0	0	0	0	0	0	0	0	0	0	0	0	0	0	0	0	0	0	0	0	0	0	0	0	0	0	0	0	0	0	0	0	0
394	Taiyuan	Bangkok	0	0	0	0	0	0	0	0	0	0	0	0	0	0	0	0	0	0	0	0	0	0	0	0	4111.42	16.6332	1.21355	14.3416	0.260172	5.03998	46047.7	369.165	27.0379	296.599	4.70256	56.4475	0	0	0	0	0	0	0	0	0	0	0
395	Tianjin	Jeju	0	0	0	0	0	0	0	0	0	0	0	0	0	0	0	0	0	0	0	0	0	0	0	0	0	0	0	0	0	0	0	0	0	0	0	0	0	0	0	0	0	0	0	0	0	0	0
396	Tianjin	Seoul	0	0	0	0	0	0	0	0	0	0	0	0	0	0	0	0	0	0	0	0	0	0	0	0	0	0	0	0	0	0	0	0	0	0	0	0	4111.42	16.6332	1.21355	14.3416	0.260172	5.03998	16124	129.266	9.46754	103.856	1.64664
397	Tianjin	Sihanoukville	0	0	0	0	0	0	0	0	0	0	0	0	0	0	0	0	0	0	0	0	0	0	0	0	0	0	0	0	0	0	0	0	0	0	0	0	0	0	0	0	0	0	0	0	0	0	0
398	Tianjin	Siem Reap	0	0	0	0	0	0	0	0	0	0	0	0	0	0	0	0	0	0	0	0	0	0	0	0	0	0	0	0	0	0	0	0	0	0	0	0	0	0	0	0	0	0	0	0	0	0	0
399	Tianjin	Okinawa	0	0	0	0	0	0	0	0	0	0	0	0	0	0	0	0	0	0	0	0	0	0	0	0	587.346	2.37617	0.173365	2.0488	0.0371674	0.719997	3999.22	32.0617	2.34823	25.7594	0.408414	4.90243	0	0	0	0	0	0	0	0	0	0	0
400	Tianjin	Osaka	0	0	0	0	0	0	0	0	0	0	0	0	0	0	0	0	0	0	0	0	0	0	0	0	0	0	0	0	0	0	0	0	0	0	0	0	4111.42	16.6332	1.21355	14.3416	0.260172	5.03998	17152.4	137.511	10.0714	110.48	1.75166
401	Tianjin	Hakodate	0	0	0	0	0	0	0	0	0	0	0	0	0	0	0	0	0	0	0	0	0	0	0	0	0	0	0	0	0	0	0	0	0	0	0	0	0	0	0	0	0	0	0	0	0	0	0
402	Tianjin	Tokyo	0	0	0	0	0	0	0	0	0	0	0	0	0	0	0	0	0	0	0	0	0	0	0	0	0	0	0	0	0	0	0	0	0	0	0	0	2349.39	9.50468	0.693458	8.19519	0.14867	2.87999	10924.5	87.582	6.41457	70.3662	1.11565
403	Tianjin	Nagoya	0	0	0	0	0	0	0	0	0	0	0	0	0	0	0	0	0	0	0	0	0	0	0	0	0	0	0	0	0	0	0	0	0	0	0	0	0	0	0	0	0	0	0	0	0	0	0
404	Tianjin	Sapporo	0	0	0	0	0	0	0	0	0	0	0	0	0	0	0	0	0	0	0	0	0	0	0	0	0	0	0	0	0	0	0	0	0	0	0	0	0	0	0	0	0	0	0	0	0	0	0
405	Tianjin	Bangkok	0	0	0	0	0	0	0	0	0	0	0	0	0	0	0	0	0	0	0	0	0	0	0	0	0	0	0	0	0	0	0	0	0	0	0	0	2055.71	8.3166	0.606776	7.17079	0.130086	2.51999	25132	201.483	14.7568	161.878	2.56657
406	Tianjin	Phuket	0	0	0	0	0	0	0	0	0	0	0	0	0	0	0	0	0	0	0	0	0	0	0	0	0	0	0	0	0	0	0	0	0	0	0	0	0	0	0	0	0	0	0	0	0	0	0
407	Weihai	Seoul	0	0	0	0	0	0	0	0	0	0	0	0	0	0	0	0	0	0	0	0	0	0	0	0	2037.28	8.84566	0.937904	7.67274	0.126524	2.49739	4784.95	41.7701	4.41512	33.1781	0.498494	5.86561	0	0	0	0	0	0	0	0	0	0	0
408	Wenzhou	Seoul	0	0	0	0	0	0	0	0	0	0	0	0	0	0	0	0	0	0	0	0	0	0	0	0	0	0	0	0	0	0	0	0	0	0	0	0	873.118	3.791	0.401959	3.28832	0.0542244	1.07031	4677.33	40.8307	4.31582	32.4319	0.487282
409	Wenzhou	Bangkok	0	0	0	0	0	0	0	0	0	0	0	0	0	0	0	0	0	0	0	0	0	0	0	0	0	0	0	0	0	0	0	0	0	0	0	0	0	0	0	0	0	0	0	0	0	0	0
410	Wenzhou	Rome	0	0	0	0	0	0	0	0	0	0	0	0	0	0	0	0	0	0	0	0	0	0	0	0	1315.34	3.98684	0.611949	8.00539	0.0875583	1.61241	42423.9	246.409	37.8952	434.671	3.3493	52.0052	0	0	0	0	0	0	0	0	0	0	0
411	Urumqi	Dubai	0	0	0	0	0	0	0	0	0	0	0	0	0	0	0	0	0	0	0	0	0	0	0	0	0	0	0	0	0	0	0	0	0	0	0	0	0	0	0	0	0	0	0	0	0	0	0
412	Urumqi	Baku	0	0	0	0	0	0	0	0	0	0	0	0	0	0	0	0	0	0	0	0	0	0	0	0	0	0	0	0	0	0	0	0	0	0	0	0	0	0	0	0	0	0	0	0	0	0	0
413	Urumqi	Islamabad	0	0	0	0	0	0	0	0	0	0	0	0	0	0	0	0	0	0	0	0	0	0	0	0	0	0	0	0	0	0	0	0	0	0	0	0	0	0	0	0	0	0	0	0	0	0	0
414	Urumqi	Moscow	0	0	0	0	0	0	0	0	0	0	0	0	0	0	0	0	0	0	0	0	0	0	0	0	0	0	0	0	0	0	0	0	0	0	0	0	0	0	0	0	0	0	0	0	0	0	0
415	Urumqi	Novosibirsk	0	0	0	0	0	0	0	0	0	0	0	0	0	0	0	0	0	0	0	0	0	0	0	0	0	0	0	0	0	0	0	0	0	0	0	0	0	0	0	0	0	0	0	0	0	0	0
416	Urumqi	Tbilisi	0	0	0	0	0	0	0	0	0	0	0	0	0	0	0	0	0	0	0	0	0	0	0	0	0	0	0	0	0	0	0	0	0	0	0	0	0	0	0	0	0	0	0	0	0	0	0
417	Urumqi	Almaty	0	0	0	0	0	0	0	0	0	0	0	0	0	0	0	0	0	0	0	0	0	0	0	0	0	0	0	0	0	0	0	0	0	0	0	0	0	0	0	0	0	0	0	0	0	0	0
418	Urumqi	Jeju	0	0	0	0	0	0	0	0	0	0	0	0	0	0	0	0	0	0	0	0	0	0	0	0	0	0	0	0	0	0	0	0	0	0	0	0	0	0	0	0	0	0	0	0	0	0	0
419	Urumqi	Osh	0	0	0	0	0	0	0	0	0	0	0	0	0	0	0	0	0	0	0	0	0	0	0	0	0	0	0	0	0	0	0	0	0	0	0	0	0	0	0	0	0	0	0	0	0	0	0
420	Urumqi	Bishkek	0	0	0	0	0	0	0	0	0	0	0	0	0	0	0	0	0	0	0	0	0	0	0	0	0	0	0	0	0	0	0	0	0	0	0	0	0	0	0	0	0	0	0	0	0	0	0
421	Urumqi	Dushanbe	0	0	0	0	0	0	0	0	0	0	0	0	0	0	0	0	0	0	0	0	0	0	0	0	0	0	0	0	0	0	0	0	0	0	0	0	0	0	0	0	0	0	0	0	0	0	0
422	Urumqi	Khujand	0	0	0	0	0	0	0	0	0	0	0	0	0	0	0	0	0	0	0	0	0	0	0	0	0	0	0	0	0	0	0	0	0	0	0	0	0	0	0	0	0	0	0	0	0	0	0
423	Urumqi	Ashkhabad	0	0	0	0	0	0	0	0	0	0	0	0	0	0	0	0	0	0	0	0	0	0	0	0	0	0	0	0	0	0	0	0	0	0	0	0	0	0	0	0	0	0	0	0	0	0	0
424	Urumqi	Tashkent	0	0	0	0	0	0	0	0	0	0	0	0	0	0	0	0	0	0	0	0	0	0	0	0	0	0	0	0	0	0	0	0	0	0	0	0	0	0	0	0	0	0	0	0	0	0	0
425	Urumqi	Teheran	0	0	0	0	0	0	0	0	0	0	0	0	0	0	0	0	0	0	0	0	0	0	0	0	0	0	0	0	0	0	0	0	0	0	0	0	0	0	0	0	0	0	0	0	0	0	0
426	Wuxi	Osaka	0	0	0	0	0	0	0	0	0	0	0	0	0	0	0	0	0	0	0	0	0	0	0	0	0	0	0	0	0	0	0	0	0	0	0	0	0	0	0	0	0	0	0	0	0	0	0
427	Wuxi	Bangkok	0	0	0	0	0	0	0	0	0	0	0	0	0	0	0	0	0	0	0	0	0	0	0	0	0	0	0	0	0	0	0	0	0	0	0	0	0	0	0	0	0	0	0	0	0	0	0
428	Wuxi	Phuket	0	0	0	0	0	0	0	0	0	0	0	0	0	0	0	0	0	0	0	0	0	0	0	0	0	0	0	0	0	0	0	0	0	0	0	0	0	0	0	0	0	0	0	0	0	0	0
429	Wuxi	Singapore	0	0	0	0	0	0	0	0	0	0	0	0	0	0	0	0	0	0	0	0	0	0	0	0	0	0	0	0	0	0	0	0	0	0	0	0	0	0	0	0	0	0	0	0	0	0	0
430	Wuhan	Moscow	0	0	0	0	0	0	0	0	0	0	0	0	0	0	0	0	0	0	0	0	0	0	0	0	0	0	0	0	0	0	0	0	0	0	0	0	0	0	0	0	0	0	0	0	0	0	0
431	Wuhan	Jeju	0	0	0	0	0	0	0	0	0	0	0	0	0	0	0	0	0	0	0	0	0	0	0	0	4111.42	16.6332	1.21355	14.3416	0.260172	5.03998	12632.7	101.276	7.41757	81.3687	1.2901	15.4858	0	0	0	0	0	0	0	0	0	0	0
432	Wuhan	Seoul	0	0	0	0	0	0	0	0	0	0	0	0	0	0	0	0	0	0	0	0	0	0	0	0	0	0	0	0	0	0	0	0	0	0	0	0	0	0	0	0	0	0	0	0	0	0	0
433	Wuhan	Siem Reap	0	0	0	0	0	0	0	0	0	0	0	0	0	0	0	0	0	0	0	0	0	0	0	0	0	0	0	0	0	0	0	0	0	0	0	0	0	0	0	0	0	0	0	0	0	0	0
434	Wuhan	Kuala Lumpur	0	0	0	0	0	0	0	0	0	0	0	0	0	0	0	0	0	0	0	0	0	0	0	0	0	0	0	0	0	0	0	0	0	0	0	0	0	0	0	0	0	0	0	0	0	0	0
435	Wuhan	Sabah	0	0	0	0	0	0	0	0	0	0	0	0	0	0	0	0	0	0	0	0	0	0	0	0	0	0	0	0	0	0	0	0	0	0	0	0	0	0	0	0	0	0	0	0	0	0	0
436	Wuhan	Osaka	0	0	0	0	0	0	0	0	0	0	0	0	0	0	0	0	0	0	0	0	0	0	0	0	0	0	0	0	0	0	0	0	0	0	0	0	0	0	0	0	0	0	0	0	0	0	0
437	Wuhan	Tokyo	0	0	0	0	0	0	0	0	0	0	0	0	3907.8	14.1663	2.42494	18.0959	0.252362	4.79037	32745.2	229.249	39.4825	269.839	2.95905	40.1407	0	0	0	0	0	0	0	0	0	0	0	0	0	0	0	0	0	0	0	0	0	0	0
438	Wuhan	Krabi	0	0	0	0	0	0	0	0	0	0	0	0	0	0	0	0	0	0	0	0	0	0	0	0	0	0	0	0	0	0	0	0	0	0	0	0	0	0	0	0	0	0	0	0	0	0	0
439	Wuhan	Bangkok	0	0	0	0	0	0	0	0	0	0	0	0	0	0	0	0	0	0	0	0	0	0	0	0	0	0	0	0	0	0	0	0	0	0	0	0	0	0	0	0	0	0	0	0	0	0	0
440	Wuhan	Phuket	0	0	0	0	0	0	0	0	0	0	0	0	0	0	0	0	0	0	0	0	0	0	0	0	0	0	0	0	0	0	0	0	0	0	0	0	0	0	0	0	0	0	0	0	0	0	0
441	Wuhan	Chiang Mai	0	0	0	0	0	0	0	0	0	0	0	0	0	0	0	0	0	0	0	0	0	0	0	0	0	0	0	0	0	0	0	0	0	0	0	0	873.118	3.791	0.401959	3.28832	0.0542244	1.07031	6763.05	59.0379	6.24034	46.894	0.704571
442	Wuhan	Singapore	0	0	0	0	0	0	0	0	0	0	0	0	0	0	0	0	0	0	0	0	0	0	0	0	0	0	0	0	0	0	0	0	0	0	0	0	0	0	0	0	0	0	0	0	0	0	0
443	Xi'an	Moscow	0	0	0	0	0	0	0	0	0	0	0	0	0	0	0	0	0	0	0	0	0	0	0	0	1751.04	6.08945	1.0268	7.23169	0.106121	2.1465	33772.1	241.351	40.9804	266.052	3.20146	41.3994	0	0	0	0	0	0	0	0	0	0	0
444	Xi'an	Paris	0	0	0	0	0	0	0	0	0	0	0	0	0	0	0	0	0	0	0	0	0	0	0	0	0	0	0	0	0	0	0	0	0	0	0	0	0	0	0	0	0	0	0	0	0	0	0
445	Xi'an	Jeju	0	0	0	0	0	0	0	0	0	0	0	0	0	0	0	0	0	0	0	0	0	0	0	0	0	0	0	0	0	0	0	0	0	0	0	0	0	0	0	0	0	0	0	0	0	0	0
446	Xi'an	Seoul	0	0	0	0	0	0	0	0	0	0	0	0	0	0	0	0	0	0	0	0	0	0	0	0	2037.28	8.84566	0.937904	7.67274	0.126524	2.49739	13784.4	120.331	12.7191	95.5793	1.43606	16.8976	0	0	0	0	0	0	0	0	0	0	0
447	Xi'an	Tokyo	0	0	0	0	0	0	0	0	0	0	0	0	0	0	0	0	0	0	0	0	0	0	0	0	4075.55	17.6913	1.87581	15.3455	0.253047	4.996	30429.3	265.632	28.0774	210.992	3.17011	37.3017	0	0	0	0	0	0	0	0	0	0	0
448	Xi'an	Nagoya	0	0	0	0	0	0	0	0	0	0	0	0	0	0	0	0	0	0	0	0	0	0	0	0	2037.28	8.84566	0.937904	7.67274	0.126524	2.49739	20125.5	175.685	18.57	139.547	2.09667	24.6708	0	0	0	0	0	0	0	0	0	0	0
449	Xi'an	Krabi	0	0	0	0	0	0	0	0	0	0	0	0	0	0	0	0	0	0	0	0	0	0	0	0	2037.28	8.84566	0.937904	7.67274	0.126524	2.49739	25564.3	223.163	23.5884	177.259	2.66328	31.3379	0	0	0	0	0	0	0	0	0	0	0
450	Xi'an	Bangkok	0	0	0	0	0	0	0	0	0	0	0	0	0	0	0	0	0	0	0	0	0	0	0	0	0	0	0	0	0	0	0	0	0	0	0	0	0	0	0	0	0	0	0	0	0	0	0
451	Xi'an	Phuket	0	0	0	0	0	0	0	0	0	0	0	0	0	0	0	0	0	0	0	0	0	0	0	0	0	0	0	0	0	0	0	0	0	0	0	0	0	0	0	0	0	0	0	0	0	0	0
452	Xiamen	Manila	0	0	0	0	0	0	0	0	0	0	0	0	0	0	0	0	0	0	0	0	0	0	0	0	0	0	0	0	0	0	0	0	0	0	0	0	0	0	0	0	0	0	0	0	0	0	0
453	Xiamen	Seoul	0	0	0	0	0	0	0	0	0	0	0	0	0	0	0	0	0	0	0	0	0	0	0	0	0	0	0	0	0	0	0	0	0	0	0	0	0	0	0	0	0	0	0	0	0	0	0
454	Xiamen	Siem Reap	0	0	0	0	0	0	0	0	0	0	0	0	0	0	0	0	0	0	0	0	0	0	0	0	0	0	0	0	0	0	0	0	0	0	0	0	0	0	0	0	0	0	0	0	0	0	0
455	Xiamen	Kuala Lumpur	0	0	0	0	0	0	0	0	0	0	0	0	0	0	0	0	0	0	0	0	0	0	0	0	0	0	0	0	0	0	0	0	0	0	0	0	0	0	0	0	0	0	0	0	0	0	0
456	Xiamen	Bangkok	0	0	0	0	0	0	0	0	0	0	0	0	0	0	0	0	0	0	0	0	0	0	0	0	0	0	0	0	0	0	0	0	0	0	0	0	0	0	0	0	0	0	0	0	0	0	0
457	Xiamen	Singapore	0	0	0	0	0	0	0	0	0	0	0	0	0	0	0	0	0	0	0	0	0	0	0	0	0	0	0	0	0	0	0	0	0	0	0	0	0	0	0	0	0	0	0	0	0	0	0
458	Xiamen	Jakarta	0	0	0	0	0	0	0	0	0	0	0	0	0	0	0	0	0	0	0	0	0	0	0	0	0	0	0	0	0	0	0	0	0	0	0	0	881.019	3.56426	0.260047	3.0732	0.0557511	1.08	11578	92.8205	6.79825	74.5749	1.18238
459	Yantai	Seoul	0	0	0	0	0	0	0	0	0	0	0	0	0	0	0	0	0	0	0	0	0	0	0	0	6111.83	26.537	2.81371	23.0182	0.379571	7.49217	16717.5	145.935	15.4254	115.917	1.74162	20.4931	0	0	0	0	0	0	0	0	0	0	0
460	Yantai	Osaka	0	0	0	0	0	0	0	0	0	0	0	0	0	0	0	0	0	0	0	0	0	0	0	0	873.118	3.791	0.401959	3.28832	0.0542244	1.07031	4910.62	42.8672	4.53109	34.0495	0.511586	6.01967	0	0	0	0	0	0	0	0	0	0	0
461	Yantai	Nagoya	0	0	0	0	0	0	0	0	0	0	0	0	0	0	0	0	0	0	0	0	0	0	0	0	881.019	3.56426	0.260047	3.0732	0.0557511	1.08	5365.04	43.0115	3.1502	34.5568	0.547896	6.57672	0	0	0	0	0	0	0	0	0	0	0
462	Yanji	Vladivostok	0	0	0	0	0	0	0	0	0	0	0	0	0	0	0	0	0	0	0	0	0	0	0	0	0	0	0	0	0	0	0	0	0	0	0	0	0	0	0	0	0	0	0	0	0	0	0
463	Yanji	Busan	0	0	0	0	0	0	0	0	0	0	0	0	0	0	0	0	0	0	0	0	0	0	0	0	0	0	0	0	0	0	0	0	0	0	0	0	0	0	0	0	0	0	0	0	0	0	0
464	Yanji	Cheongju	0	0	0	0	0	0	0	0	0	0	0	0	0	0	0	0	0	0	0	0	0	0	0	0	0	0	0	0	0	0	0	0	0	0	0	0	0	0	0	0	0	0	0	0	0	0	0
465	Yanji	Seoul	0	0	0	0	0	0	0	0	0	0	0	0	0	0	0	0	0	0	0	0	0	0	0	0	0	0	0	0	0	0	0	0	0	0	0	0	2055.71	8.3166	0.606776	7.17079	0.130086	2.51999	6039.19	48.4162	3.54604	38.8991	0.616744
466	Yancheng	Seoul	0	0	0	0	0	0	0	0	0	0	0	0	0	0	0	0	0	0	0	0	0	0	0	0	582.079	2.52733	0.267973	2.19221	0.0361496	0.71354	3007.33	26.2524	2.77489	20.8524	0.313302	3.68652	0	0	0	0	0	0	0	0	0	0	0
467	Zhangjiajie	Busan	0	0	0	0	0	0	0	0	0	0	0	0	0	0	0	0	0	0	0	0	0	0	0	0	0	0	0	0	0	0	0	0	0	0	0	0	0	0	0	0	0	0	0	0	0	0	0
468	Zhengzhou	Jeju	0	0	0	0	0	0	0	0	0	0	0	0	0	0	0	0	0	0	0	0	0	0	0	0	0	0	0	0	0	0	0	0	0	0	0	0	0	0	0	0	0	0	0	0	0	0	0
469	Zhengzhou	Seoul	0	0	0	0	0	0	0	0	0	0	0	0	0	0	0	0	0	0	0	0	0	0	0	0	0	0	0	0	0	0	0	0	0	0	0	0	0	0	0	0	0	0	0	0	0	0	0
470	Zhengzhou	Amsterdam	0	0	0	0	0	0	0	0	0	0	0	0	0	0	0	0	0	0	0	0	0	0	0	0	0	0	0	0	0	0	0	0	0	0	0	0	0	0	0	0	0	0	0	0	0	0	0
471	Zhengzhou	Anchorage	0	0	0	0	0	0	0	0	0	0	0	0	0	0	0	0	0	0	0	0	0	0	0	0	0	0	0	0	0	0	0	0	0	0	0	0	0	0	0	0	0	0	0	0	0	0	0
472	Zhengzhou	Krabi	0	0	0	0	0	0	0	0	0	0	0	0	0	0	0	0	0	0	0	0	0	0	0	0	0	0	0	0	0	0	0	0	0	0	0	0	0	0	0	0	0	0	0	0	0	0	0
473	Zhengzhou	Bangkok	0	0	0	0	0	0	0	0	0	0	0	0	0	0	0	0	0	0	0	0	0	0	0	0	0	0	0	0	0	0	0	0	0	0	0	0	0	0	0	0	0	0	0	0	0	0	0
474	Zhengzhou	Phuket	0	0	0	0	0	0	0	0	0	0	0	0	0	0	0	0	0	0	0	0	0	0	0	0	0	0	0	0	0	0	0	0	0	0	0	0	0	0	0	0	0	0	0	0	0	0	0
475	Chongqing	Sydney	0	0	0	0	0	0	0	0	0	0	0	0	0	0	0	0	0	0	0	0	0	0	0	0	0	0	0	0	0	0	0	0	0	0	0	0	0	0	0	0	0	0	0	0	0	0	0
476	Chongqing	Seoul	0	0	0	0	0	0	0	0	0	0	0	0	0	0	0	0	0	0	0	0	0	0	0	0	0	0	0	0	0	0	0	0	0	0	0	0	2055.71	8.3166	0.606776	7.17079	0.130086	2.51999	15618.9	125.217	9.17099	100.603	1.59506
477	Chongqing	Phnom Penh	0	0	0	0	0	0	0	0	0	0	0	0	0	0	0	0	0	0	0	0	0	0	0	0	0	0	0	0	0	0	0	0	0	0	0	0	0	0	0	0	0	0	0	0	0	0	0
478	Chongqing	Siem Reap	0	0	0	0	0	0	0	0	0	0	0	0	0	0	0	0	0	0	0	0	0	0	0	0	0	0	0	0	0	0	0	0	0	0	0	0	0	0	0	0	0	0	0	0	0	0	0
479	Chongqing	Osaka	0	0	0	0	0	0	0	0	0	0	0	0	0	0	0	0	0	0	0	0	0	0	0	0	0	0	0	0	0	0	0	0	0	0	0	0	0	0	0	0	0	0	0	0	0	0	0
480	Chongqing	Phuket	0	0	0	0	0	0	0	0	0	0	0	0	0	0	0	0	0	0	0	0	0	0	0	0	0	0	0	0	0	0	0	0	0	0	0	0	0	0	0	0	0	0	0	0	0	0	0
481	Chongqing	Chiang Mai	0	0	0	0	0	0	0	0	0	0	0	0	0	0	0	0	0	0	0	0	0	0	0	0	0	0	0	0	0	0	0	0	0	0	0	0	0	0	0	0	0	0	0	0	0	0	0
482	Chongqing	Bangkok	0	0	0	0	0	0	0	0	0	0	0	0	0	0	0	0	0	0	0	0	0	0	0	0	0	0	0	0	0	0	0	0	0	0	0	0	0	0	0	0	0	0	0	0	0	0	0
[truncated: 1,453 more columns]
