# Supplementary material for: Impacts of the proposal of the CNG2020 strategy on aircraft emissions of China–foreign routes
Source: Copernicus journal article supplement (doi:10.5194/essd-14-4419-2022), 2022-09-27
Supplement: Supplementary file 2 [file essd-14-4419-2022-supplement.zip › Supplementary Tables/Supplementary Table S6.xlsx]

## Sheet: S5-2018 emissions(tons)
No.	Chinese cities/airports	Foreign cities	Air China												Emirates												Azerbaijan Airlines												Egypt Air
			LTO						CCD						LTO						CCD						LTO						CCD						LTO						CCD
			CO2	CO	HC	NOx	PM2.5	SO2	CO2	CO	HC	NOx	PM2.5	SO2	CO2	CO	HC	NOx	PM2.5	SO2	CO2	CO	HC	NOx	PM2.5	SO2	CO2	CO	HC	NOx	PM2.5	SO2	CO2	CO	HC	NOx	PM2.5	SO2	CO2	CO	HC	NOx	PM2.5	SO2	CO2	CO	HC	NOx	PM2.5
1	Beijing	Dubai	5051.71	13.954	2.14182	28.0189	0.306454	6.19262	97707.3	567.51	87.2771	1001.1	7.71385	119.774	9034.07	38.5376	1.24275	102.125	1.15749	11.0744	433933	1661.96	43.0728	4825.09	38.9245	531.935
2	Beijing	Baku																									1118.81	4.05583	0.694265	5.18089	0.0722516	1.37149	23266.5	162.888	28.0535	191.729	2.0711	28.5211
3	Beijing	Cairo																																					2367.17	12.9058	1.35216	21.5188	0.1878	2.90179	72979	611.172	63.9984	960.371	5.73171
4	Beijing	Vienna	2164.28	5.97822	0.917609	12.004	0.131292	2.65307	50460	293.085	45.0734	517.009	3.98374	61.8563
5	Beijing	Melbourne	2885.7	7.97096	1.22348	16.0053	0.175057	3.53743	77910.3	452.524	69.5935	798.262	6.15091	95.5062
6	Beijing	Sydney	4329.1	11.9579	1.83545	24.011	0.262618	5.30681	114922	667.497	102.654	1177.48	9.07292	140.877
7	Beijing	Lahore
8	Beijing	Karachi	4332.01	11.966	1.83668	24.0271	0.262795	5.31038	44638.5	234.713	36.0964	414.039	3.19033	54.7199
9	Beijing	Islamabad	2163.24	5.97535	0.917168	11.9982	0.131229	2.6518	33323.1	193.549	29.7659	341.425	2.63081	40.849
10	Beijing	Saint Paul	2232.28	3.55241	0.114239	14.0843	0.142956	2.73643	69403.2	159.588	4.10144	627.335	4.10345	85.0777
11	Beijing	Minsk	2885.7	7.97096	1.22348	16.0053	0.175057	3.53743	61400.1	356.628	54.8457	629.1	4.84745	75.2672
12	Beijing	Saipan
13	Beijing	Brussels
14	Beijing	Warsaw	2886.69	7.97369	1.2239	16.0108	0.175117	3.53864	63166.1	366.885	56.4231	647.194	4.98687	77.432
15	Beijing	Pyongyang
16	Beijing	Copenhagen	2886.33	7.97269	1.22374	16.0088	0.175095	3.5382	65565.6	380.822	58.5665	671.779	5.1763	80.3734
17	Beijing	Dusseldorf	2166.01	5.98299	0.918342	12.0136	0.131397	2.65519	52188	303.122	46.617	534.714	4.12017	63.9746
18	Beijing	Frankfurt	13485.6	54.8482	6.87018	96.5197	0.988368	16.5313	370346	1473.47	154.293	2315.35	13.8185	453.988
19	Beijing	Munich	5520.88	30.0998	3.1536	50.1875	0.438	6.76775	174408	1460.6	152.946	2295.13	13.6979	213.798
20	Beijing	Saint Petersburg
21	Beijing	Chita	585.737	2.782	0.26312	1.52955	0.0327517	0.718024	2147.57	22.213	2.12717	11.7329	0.219318	2.6326
22	Beijing	Irkutsk
23	Beijing	Novosibirsk
24	Beijing	Moscow	5051.99	13.9547	2.14194	28.0205	0.306471	6.19297	96464	560.289	86.1666	988.362	7.61569	118.25
25	Beijing	Vladivostok
26	Beijing	Paris	10572.6	44.0537	5.29542	78.2064	0.744454	12.9604	304770	2229.36	269.318	3643.96	23.9879	373.601
27	Beijing	Manila	2055.88	8.31727	0.606825	7.17137	0.130096	2.52019	22421.2	179.751	13.1651	144.418	2.66508	27.485
28	Beijing	Helsinki
29	Beijing	Tbilisi
30	Beijing	Havana	1110.8	1.76771	0.0568464	7.00844	0.071136	1.36167	25763.7	88.4124	2.27221	347.546	2.27333	31.5824
31	Beijing	Almaty
32	Beijing	Cheongju
33	Beijing	Jeju	587.615	2.37726	0.173444	2.04973	0.0371844	0.720326	2877.71	23.0706	1.68971	18.5356	0.342056	3.52763
34	Beijing	Busan	2055.71	8.3166	0.606776	7.17079	0.130086	2.51999	10814.1	86.6965	6.34973	69.6548	1.28541	13.2564
35	Beijing	Daegu
36	Beijing	Seoul	9085.71	37.3608	3.01837	32.2593	0.57255	11.1377	40477	330.803	26.7334	265.074	4.68145	49.6187
37	Beijing	Amsterdam
38	Beijing	Montreal	3343.08	5.32012	0.171086	21.0927	0.214092	4.0981	119527	532.175	13.677	2091.96	13.6837	146.522
39	Beijing	Toronto
40	Beijing	Vancouver	8408.24	38.0766	4.37785	66.2036	0.613166	10.3072	260326	1988.59	229.508	3208.31	20.4763	319.12
41	Beijing	Calgary
42	Beijing	Phnom Penh
43	Beijing	Siem Reap
44	Beijing	Prague
45	Beijing	Vientiane
46	Beijing	Male
47	Beijing	Sabah
48	Beijing	Kuala Lumpur	2886.47	7.97308	1.2238	16.0096	0.175103	3.53837	41911.1	243.43	37.4371	429.417	3.30882	51.3766
49	Beijing	Boston
50	Beijing	Chicago
51	Beijing	Dallas
52	Beijing	Las Vegas
53	Beijing	Los Angeles	14940.2	66.4036	6.50671	124.972	1.12566	18.3144	519434	3826.12	353.655	7415.58	45.5972	636.746
54	Beijing	Houston	3940.24	21.4822	2.25072	35.8188	0.3126	4.83014	168664	1412.49	147.908	2219.54	13.2467	206.756
55	Beijing	Honolulu	2162.55	5.97344	0.916875	11.9944	0.131187	2.65095	51977.3	301.898	46.4288	532.555	4.10353	63.7163
56	Beijing	New York	19006.5	84.948	10.0238	146.707	1.42637	23.299	729255	3826.77	400.717	6013.22	35.8883	893.955
57	Beijing	Washington	43363.5	236.417	24.7698	394.195	3.44025	53.157	163548	1369.65	143.422	2152.22	12.8449	200.485
58	Beijing	San Jose
59	Beijing	Seattle
60	Beijing	San Francisco	7964.73	24.7484	3.71658	46.3322	0.550368	9.76354	225059	0	0	0	0	275.888
61	Beijing	Ulan Bator	2055.71	8.3166	0.606776	7.17079	0.130086	2.51999	10234.3	82.0483	6.00929	65.9202	1.21649	12.5457
62	Beijing	Dacca
63	Beijing	Rangoon	881.422	3.56588	0.260166	3.0746	0.0557766	1.08049	10799.8	86.5817	6.34132	69.5625	1.2837	13.2389
64	Beijing	Naypyidaw
65	Beijing	Mexico City
66	Beijing	Tijuana
67	Beijing	Johannesburg	1580.63	8.61761	0.90288	14.3688	0.1254	1.93762	67769.7	567.546	59.4302	891.819	5.32257	83.0753
68	Beijing	Hiroshima	2934.32	11.8711	0.86611	10.2356	0.185684	3.59703	11275.2	90.3933	6.62048	72.6249	1.34022	13.8217
69	Beijing	Okinawa	1174.29	4.75071	0.34661	4.09619	0.0743094	1.4395	8539	68.4571	5.01386	55.0007	1.01498	10.4675
70	Beijing	Nagoya	2055.27	8.3148	0.606645	7.16924	0.130058	2.51944	15122.9	121.24	8.87971	97.408	1.79757	18.5383
71	Beijing	Osaka	7089.24	22.8004	3.07984	35.6929	0.432993	8.69032	51362.3	168.742	40.3792	406.09	3.92267	62.9623
72	Beijing	Tokyo	16215	54.444	7.09724	79.0547	0.992463	19.8771	126416	584.016	114.476	1120.52	11.3115	154.967
73	Beijing	Sendai	1177.11	4.76211	0.347442	4.10601	0.0744876	1.44295	7422.97	59.5099	4.35856	47.8122	0.882325	9.09942
74	Beijing	Sapporo	2055.71	8.3166	0.606776	7.17079	0.130086	2.51999	16784.1	134.558	9.85514	108.108	1.99503	20.5747
75	Beijing	Stockholm	5051.71	13.954	2.14182	28.0189	0.306454	6.19262	110475	641.668	98.6818	1131.92	8.72183	135.425
76	Beijing	Geneva	2166.01	5.98299	0.918342	12.0136	0.131397	2.65519	51871.2	301.282	46.334	531.468	4.09516	63.5862
77	Beijing	Zurich	2886.33	7.97269	1.22374	16.0088	0.175095	3.5382	70770.8	411.056	63.2161	725.111	5.58725	86.7542
78	Beijing	Colombo
79	Beijing	Bangkok	7496.8	17.5561	1.60051	13.9926	0.250419	9.18994	44976.9	395.233	36.087	289.025	4.81639	55.1349
80	Beijing	Chiang Mai	881.14	3.56474	0.260082	3.07362	0.0557588	1.08014	9699.82	77.7635	5.69546	62.4777	1.15296	11.8905
81	Beijing	Phuket	3748.4	8.77805	0.800255	6.99632	0.12521	4.59497	26456.9	232.489	21.2276	170.014	2.83316	32.4321
82	Beijing	Istanbul
83	Beijing	Ashkhabad
84	Beijing	Tashkent
85	Beijing	Barcelona	2885.7	7.97096	1.22348	16.0053	0.175057	3.53743	75485.6	438.44	67.4276	773.419	5.95948	92.5339
86	Beijing	Madrid	2782.34	4.42777	0.142389	17.5548	0.178182	3.41072	89351.9	397.825	10.2242	1563.83	10.2292	109.532
87	Beijing	Athens	2166.01	5.98299	0.918342	12.0136	0.131397	2.65519	50806.1	295.095	45.3826	520.555	4.01106	62.2805
88	Beijing	Singapore	7796.96	12.408	0.399018	49.1938	0.49932	9.55788	130810	582.409	14.968	2289.43	14.9753	160.353
89	Beijing	Auckland	2226.94	3.54392	0.113966	14.0506	0.142614	2.72989	79271.3	352.943	9.07068	1387.4	9.07513	97.1745
90	Beijing	Budapest	2885.7	7.97096	1.22348	16.0053	0.175057	3.53743	67400.7	391.481	60.2058	690.582	5.32119	82.623
91	Beijing	Teheran
92	Beijing	Tel Aviv
93	Beijing	Malpensa	4332.01	11.966	1.83668	24.0271	0.262795	5.31038	102367	594.575	91.4395	1048.84	8.08173	125.486
94	Beijing	Rome	5520.88	30.0998	3.1536	50.1875	0.438	6.76775	177895	1489.81	156.004	2341.02	13.9717	218.072
95	Beijing	Mumbai	2166.01	5.98299	0.918342	12.0136	0.131397	2.65519	37376.4	217.092	33.3865	382.956	2.95081	45.8178
96	Beijing	New Delhi	2165.31	5.98108	0.918049	12.0097	0.131355	2.65434	26988	156.753	24.107	276.516	2.13066	33.0831
97	Beijing	Bali
98	Beijing	Jakarta	104.333	3.98866	0.612228	8.00904	0.0875983	0.127897	21078.7	122.431	18.8286	215.971	1.66414	25.8393
99	Beijing	Manchester
100	Beijing	London	11041.8	60.1996	6.3072	100.375	0.876	13.5355	355528	2977.41	311.778	4678.59	27.9228	435.823
101	Beijing	Da Nang
102	Beijing	Hanoi
103	Beijing	Ho Chi Minh City	2055.71	8.3166	0.606776	7.17079	0.130086	2.51999	26521.8	212.625	15.5728	170.83	3.15249	32.5117
104	Beijing	Nha Trang
105	Shanghai Pudong	Dubai													9034.8	38.5407	1.24285	102.133	1.15758	11.0753	474655	1817.93	47.115	5277.91	42.5773	581.855
106	Shanghai Pudong	Vienna
107	Shanghai Pudong	Brisbane
108	Shanghai Pudong	Melbourne	2165.31	5.98108	0.918049	12.0097	0.131355	2.65434	50738.3	294.702	45.3221	519.861	4.00572	62.1975
109	Shanghai Pudong	Sydney	2165.19	5.98075	0.917997	12.0091	0.131348	2.65419	52469.7	304.758	46.8686	537.6	4.1424	64.3198
110	Shanghai Pudong	Saipan
111	Shanghai Pudong	Brussels
112	Shanghai Pudong	Copenhagen
113	Shanghai Pudong	Frankfurt	5051.49	13.9534	2.14173	28.0177	0.306441	6.19235	136422	792.374	121.859	1397.77	10.7703	167.232
114	Shanghai Pudong	Munich	2165.31	5.98108	0.918049	12.0097	0.131355	2.65434	57948	336.577	51.7621	593.73	4.57491	71.0354
115	Shanghai Pudong	Saint Petersburg
116	Shanghai Pudong	Moscow
117	Shanghai Pudong	Vladivostok
118	Shanghai Pudong	Paris	4330.38	11.9615	1.83599	24.0181	0.262696	5.30839	118413	687.775	105.773	1213.25	9.34855	145.157
119	Shanghai Pudong	Cebu
120	Shanghai Pudong	Kalibo
121	Shanghai Pudong	Manila
122	Shanghai Pudong	Helsinki
123	Shanghai Pudong	Jeju
124	Shanghai Pudong	Busan
125	Shanghai Pudong	Daegu
126	Shanghai Pudong	Seoul
127	Shanghai Hongqiao	Seoul
128	Shanghai Pudong	Muan
129	Shanghai Pudong	Amsterdam
130	Shanghai Pudong	Montreal
131	Shanghai Pudong	Toronto
132	Shanghai Pudong	Vancouver
133	Shanghai Pudong	Phnom Penh
134	Shanghai Pudong	Siem Reap
135	Shanghai Pudong	Prague
136	Shanghai Pudong	Male
137	Shanghai Pudong	Sabah
138	Shanghai Pudong	Kuala Lumpur
139	Shanghai Pudong	Anchorage	9146	32.1874	3.12546	55.2627	0.585397	11.2116	212464	1425.46	138.518	2305.09	17.1118	260.449
140	Shanghai Pudong	Atlanta
141	Shanghai Pudong	Boston
142	Shanghai Pudong	Chicago
143	Shanghai Pudong	Dallas
144	Shanghai Pudong	Los Angeles	2814.34	9.90447	0.961745	17.005	0.180134	3.44995	95654.6	641.763	62.3629	1037.79	7.70397	117.258
145	Shanghai Pudong	Honolulu
146	Shanghai Pudong	New York
147	Shanghai Pudong	Seattle
148	Shanghai Pudong	San Francisco
149	Shanghai Pudong	Mexico City
150	Shanghai Pudong	Niigata
151	Shanghai Pudong	Fukuoka	2037.28	8.84566	0.937904	7.67274	0.126524	2.49739	7998.53	69.8231	7.38034	55.4607	0.833284	9.80498
152	Shanghai Pudong	Komatsu
153	Shanghai Pudong	Kagoshima
154	Shanghai Pudong	Saga
155	Shanghai Pudong	Hiroshima
156	Shanghai Pudong	Matsuyama
157	Shanghai Pudong	Okinawa
158	Shanghai Pudong	Okayama
159	Shanghai Pudong	Nagoya	2037.28	8.84566	0.937904	7.67274	0.126524	2.49739	11442	99.883	10.5577	79.3373	1.19202	14.0262
160	Shanghai Pudong	Nagasaki
161	Shanghai Pudong	Osaka	16148.8	42.5838	5.23803	78.536	0.993032	19.796	70317.3	390.535	46.4216	618.23	5.9772	86.1983
162	Shanghai Hongqiao	Tokyo
163	Shanghai Pudong	Tokyo	12948.2	40.5256	5.34108	70.3801	0.805588	15.8725	86712.5	550.705	72.9376	850.672	7.4201	106.296
164	Shanghai Pudong	Takamatsu
165	Shanghai Pudong	Sendai	588.553	2.38105	0.173721	2.05301	0.0372438	0.721476	4460.18	35.7573	2.61889	28.7285	0.530155	5.4675
166	Shanghai Pudong	Sapporo
167	Shanghai Pudong	Toyama
168	Shanghai Pudong	Ibaraki
169	Shanghai Pudong	Shizuoka
170	Shanghai Pudong	Zurich
171	Shanghai Pudong	Colombo
172	Shanghai Pudong	Bangkok	2037.3	8.84578	0.937917	7.67284	0.126525	2.49742	23680.2	206.716	21.85	164.195	2.46699	29.0283
173	Shanghai Pudong	Chiang Mai
174	Shanghai Pudong	Phuket
175	Shanghai Pudong	Istanbul
176	Shanghai Pudong	Seri Begawan
177	Shanghai Pudong	Barcelona	2885.7	7.97096	1.22348	16.0053	0.175057	3.53743	91516.1	531.549	81.7468	937.665	7.22506	112.185
178	Shanghai Pudong	Madrid
179	Shanghai Pudong	Singapore
180	Shanghai Pudong	Auckland
181	Shanghai Pudong	Teheran
182	Shanghai Pudong	Tel Aviv
183	Shanghai Pudong	Malpensa	5051.71	13.954	2.14182	28.0189	0.306454	6.19262	135927	789.498	121.417	1392.69	10.7312	166.625
184	Shanghai Pudong	Rome
185	Shanghai Pudong	Mumbai
186	Shanghai Pudong	New Delhi
187	Shanghai Pudong	Bali
188	Shanghai Pudong	Jakarta
189	Shanghai Pudong	London
190	Shanghai Pudong	Da Nang
191	Shanghai Pudong	Hanoi
192	Shanghai Pudong	Ho Chi Minh City
193	Shanghai Pudong	Nha Trang
194	Guangzhou	Dubai													4517.04	19.2688	0.621376	51.0623	0.578744	5.5372	216116	827.723	21.452	2403.09	19.3859	264.925
195	Guangzhou	Baku
196	Guangzhou	Cairo																																					5520.88	30.0998	3.1536	50.1875	0.438	6.76775	180710	1513.38	158.473	2378.07	14.1928
197	Guangzhou	Adelaide
198	Guangzhou	Brisbane
199	Guangzhou	Melbourne
200	Guangzhou	Perth
201	Guangzhou	Saipan
202	Guangzhou	Frankfurt
203	Guangzhou	Moscow
204	Guangzhou	Paris
205	Guangzhou	Cebu
206	Guangzhou	Manila
207	Guangzhou	Helsinki
208	Guangzhou	Busan
209	Guangzhou	Seoul
210	Guangzhou	Amsterdam
211	Guangzhou	Bishkek
212	Guangzhou	Toronto
213	Guangzhou	Vancouver
214	Guangzhou	Phnom Penh
215	Guangzhou	Siem Reap
216	Guangzhou	Nairobi
217	Guangzhou	Vientiane
218	Guangzhou	Male
219	Guangzhou	Sabah
220	Guangzhou	Langkawi
221	Guangzhou	Kuala Lumpur
222	Guangzhou	Penang
223	Guangzhou	Anchorage
224	Guangzhou	Los Angeles
225	Guangzhou	New York
226	Guangzhou	San Francisco
227	Guangzhou	Dacca
228	Guangzhou	Rangoon
229	Guangzhou	Mexico City
230	Guangzhou	Katmandu
231	Guangzhou	Nagoya
232	Guangzhou	Osaka
233	Guangzhou	Tokyo
234	Guangzhou	Colombo
235	Guangzhou	Bangkok
236	Guangzhou	Chiang Mai
237	Guangzhou	Krabi
238	Guangzhou	Phuket
239	Guangzhou	Istanbul
240	Guangzhou	Singapore
241	Guangzhou	Auckland
242	Guangzhou	Teheran
243	Guangzhou	Rome
244	Guangzhou	New Delhi
245	Guangzhou	Bali
246	Guangzhou	Jakarta
247	Guangzhou	London
248	Guangzhou	Da Nang
249	Guangzhou	Hanoi
250	Guangzhou	Phu Quoc Island
251	Guangzhou	Ho Chi Minh City
252	Guangzhou	Nha Trang
253	Changchun	Seoul
254	Changchun	Tokyo
255	Changsha	Frankfurt
256	Changsha	Seoul
257	Changsha	Bangkok
258	Changsha	Hanoi
259	Chengdu	Melbourne
260	Chengdu	Sydney	2166.01	5.98299	0.918342	12.0136	0.131397	2.65519	56101.5	325.852	50.1127	574.811	4.42913	68.7718
261	Chengdu	Frankfurt	2166.01	5.98299	0.918342	12.0136	0.131397	2.65519	60054.5	348.813	53.6437	615.313	4.74122	73.6177
262	Chengdu	Seoul	1454.93	6.31717	0.669809	5.47953	0.0903575	1.78352	12991.9	132.96	11.9878	90.0843	1.3535	15.9261
263	Chengdu	Siem Reap
264	Chengdu	Male
265	Chengdu	Sabah
266	Chengdu	Katmandu	2911.14	12.6399	1.34021	10.9639	0.180794	3.56861	21781.8	190.144	20.0983	151.032	2.26922	26.7011
267	Chengdu	Krabi
268	Chengdu	Bangkok	2037.02	8.84456	0.937787	7.67178	0.126508	2.49708	16987	161.165	15.6741	117.786	1.7697	20.8235
269	Chengdu	Phuket
270	Chengdu	Chiang Mai
271	Chengdu	Surat Thani
272	Chengdu	Singapore	2036.95	8.84426	0.937756	7.67153	0.126504	2.49699	25386.5	221.611	23.4244	176.026	2.64475	31.1199
273	Dalian	Seoul
274	Dalian	Osaka	2055.71	8.3166	0.606776	7.17079	0.130086	2.51999	11560.8	92.6829	6.78817	74.4644	1.37416	14.1718
275	Dalian	Tokyo	1174.55	4.75175	0.346686	4.09708	0.0743256	1.43981	7742.17	62.069	4.54598	49.8682	0.920267	9.49072
276	Dalian	Fukuoka.	2055.71	8.3166	0.606776	7.17079	0.130086	2.51999	10075	80.771	5.91573	64.894	1.19755	12.3504
277	Dalian	Toyama
278	Dalian	Hiroshima	1467.16	5.93554	0.433055	5.11778	0.0928422	1.79851	7103.57	56.9493	4.17101	45.7549	0.84436	8.70789
279	Dalian	Nagoya
280	Fuzhou	Kuala Lumpur
281	Fuzhou	Osaka
282	Fuzhou	Bangkok
283	Fuzhou	Singapore
284	Fuzhou	Jakarta
285	Guiyang	Phuket
286	Guiyang	Bangkok
287	Guilin	Seoul
288	Harbin	Osaka
289	Harbin	Niigata
290	Harbin	Tokyo
291	Haikou	Singapore
292	Haikou	Bangkok
293	Hailar	Chita	292.869	1.391	0.13156	0.764774	0.0163758	0.359012	750.48	7.76245	0.743348	4.10011	0.0766416	0.919974
294	Hangzhou	Jeju
295	Hangzhou	Cheongju
296	Hangzhou	Seoul	2037.28	8.84566	0.937904	7.67274	0.126524	2.49739	9103.21	79.4664	8.39964	63.1204	0.948369	11.1591
297	Hangzhou	Okinawa
298	Hangzhou	Bangkok	4074.29	17.6902	1.87569	15.3445	0.253031	4.99446	42667.1	372.462	39.3694	295.848	4.44504	52.3033
299	Hangzhou	Phuket	1746.6	7.58359	0.804087	6.57802	0.108472	2.14107	22448.9	195.968	20.7139	155.658	2.33872	27.519
300	Hangzhou	Da Nang
301	Hefei	Seoul
302	Jinan	Osaka
303	Jinan	Bangkok
304	Jinan	Seoul
305	Kiamusze	Seoul
306	Jieyang	Bangkok
307	Kunming	Dubai
308	Kunming	Paris
309	Kunming	Seoul
310	Kunming	Siem Reap
311	Kunming	Vientiane
312	Kunming	Dacca
313	Kunming	Mandalay
314	Kunming	Naypyidaw
315	Kunming	Rangoon	2037.28	8.84566	0.937904	7.67274	0.126524	2.49739	9190.57	80.229	8.48024	63.7261	0.95747	11.2662
316	Kunming	Katmandu
317	Kunming	Colombo
318	Kunming	Krabi
319	Kunming	Bangkok
320	Kunming	Phuket.
321	Kunming	Chiang Rai
322	Kunming	Chiang Mai
323	Kunming	Koh Samui
324	Kunming	Singapore
325	Kunming	Calcutta
326	Kunming	New Delhi
327	Kunming	Hanoi
328	Kunming	Da Nang
329	Kunming	Ho Chi Minh City
330	Kunming	Nha Trang
331	Kunming	Katmandu
332	Kunming	Bali
333	Lhasa	Katmandu	873.118	3.791	0.401959	3.28832	0.0542244	1.07031	2532.55	22.1079	2.33682	17.5604	0.263841	3.10453
334	Lanzhou	Bangkok
335	Lianyungang	Bangkok	881.422	3.56588	0.260166	3.0746	0.0557766	1.08049	9873.32	79.1544	5.79734	63.5952	1.17358	12.1032
336	Manchuria	Irkutsk
337	Mudanjiang	Seoul
338	Nanchang	Bangkok
339	Nanjing	Sydney
340	Nanjing	Jeju
341	Nanjing	Seoul
342	Nanjing	Busan
343	Nanjing	Siem Reap
344	Nanjing	Osaka
345	Nanjing	Tokyo
346	Nanjing	Phuket
347	Nanjing	Da Nang
348	Nanning	Seoul
349	Nanning	Phnom Penh
350	Nanning	Vientiane
351	Nanning	Rangoon
352	Nanning	Phuket
353	Nanning	Chiang Mai
354	Nanning	Bangkok
355	Nanning	Singapore
356	Nanning	Hanoi
357	Nanning	Ho Chi Minh City
358	Ningbo	Jeju
359	Ningbo	Bangkok
360	Qingdao	Seoul
361	Qingdao	Busan
362	Qingdao	Osaka
363	Qingdao	Tokyo
364	Qingdao	Fukuoka
365	Qingdao	Nagoya
366	Qingdao	Bangkok
367	Shenzhen	Seoul
368	Shenzhen	Sabah
369	Shenzhen	Tokyo
370	Shenzhen	Osaka
371	Shenzhen	Bangkok
372	Shenzhen	Phuket
373	Shenzhen	Chiang Mai
374	Shenzhen	Chiang Rai
375	Shenzhen	Singapore
376	Shenzhen	Bali
377	Shenzhen	Jakarta
378	Shenzhen	Hanoi
379	Shenzhen	Ho Chi Minh City
380	Shenzhen	Nha Trang
381	Shenzhen	Da Nang
382	Shenyang	Daegu
383	Shenyang	Busan
384	Shenyang	Jeju
385	Shenyang	Seoul
386	Shenyang	Vancouver
387	Shenyang	Osaka
388	Shenyang	Tokyo
389	Shenyang	Nagoya
390	Shijiazhuang	Seoul
391	Shijiazhuang	Busan
392	Taiyuan	Bangkok
393	Tianjin	Jeju
394	Tianjin	Seoul	3230.29	13.0685	0.953472	11.268	0.204414	3.95984	13150.6	105.429	7.72168	84.7048	1.56314	16.1207
395	Tianjin	Okinawa	588.553	2.38105	0.173721	2.05301	0.0372438	0.721476	3992.88	32.0109	2.34451	25.7186	0.47461	4.89466
396	Tianjin	Osaka	3524.56	20.2002	1.4738	17.4172	0.315966	4.32057	16042.2	206.078	15.0933	165.57	3.05541	19.6653
397	Tianjin	Tokyo	2349.88	4.75334	1.04041	12.2954	0.223052	2.88059	10879.5	75.8037	11.9401	130.979	2.41709	13.3366
398	Tianjin	Nagoya
399	Tianjin	Sapporo		9.50669						87.2212
400	Tianjin	Bangkok	3818.27	11.8825	1.38711	16.3926	0.29738	4.68062	37330	287.981	28.2467	309.859	5.71813	45.7609
401	Tianjin	Phuket
402	Weihai	Seoul		7.12949						97.6884
403	Wenzhou	Seoul
404	Wenzhou	Bangkok
405	Wenzhou	Rome
406	Urumqi	Dubai
407	Urumqi	Baku
408	Urumqi	Islamabad
409	Urumqi	Moscow
410	Urumqi	Novosibirsk
411	Urumqi	Tbilisi
412	Urumqi	Almaty
413	Urumqi	Seoul
414	Urumqi	Bishkek
415	Urumqi	Dushanbe
416	Urumqi	Khujand
417	Urumqi	Ashkhabad
418	Urumqi	Tashkent
419	Urumqi	Teheran
420	Wuxi	Osaka
421	Wuxi	Bangkok
422	Wuxi	Phuket
423	Wuxi	Singapore
424	Wuhan	Moscow
425	Wuhan	Seoul
426	Wuhan	Kuala Lumpur
427	Wuhan	Sabah
428	Wuhan	Osaka
429	Wuhan	Tokyo
430	Wuhan	Krabi
431	Wuhan	Bangkok
432	Wuhan	Phuket
433	Wuhan	Chiang Mai	873.517	3.79273	0.402142	3.28982	0.0542492	1.0708	6963.21	60.7853	6.42503	48.2819	0.725424	8.53583
434	Wuhan	Singapore
435	Xi'an	Moscow
436	Xi'an	Paris
437	Xi'an	Seoul
438	Xi'an	Tokyo
439	Xi'an	Nagoya
440	Xi'an	Krabi
441	Xi'an	Bangkok
442	Xi'an	Phuket
443	Xiamen	Manila
444	Xiamen	Seoul
445	Xiamen	Siem Reap
446	Xiamen	Kuala Lumpur
447	Xiamen	Bangkok
448	Xiamen	Singapore
449	Xiamen	Jakarta
450	Yantai	Seoul
451	Yantai	Osaka
452	Yantai	Nagoya
453	Yanji	Busan
454	Yanji	Cheongju
455	Yanji	Seoul	2055.71	8.3166	0.606776	7.17079	0.130086	2.51999	6269.09	50.2593	3.68103	40.3799	0.74517	7.68495
456	Yancheng	Seoul
457	Zhangjiajie	Busan
458	Zhengzhou	Seoul
459	Zhengzhou	Amsterdam
460	Zhengzhou	Anchorage
461	Zhengzhou	Bangkok
462	Zhengzhou	Phuket
463	Chongqing	Sydney
464	Chongqing	Seoul	1174.55	4.75175	0.346686	4.09708	0.0743256	1.43981	9278.01	74.3818	5.44778	59.7607	1.10282	11.3734
465	Chongqing	Amsterdam	701.611	2.46917	0.239762	4.23933	0.0449072	0.860068	23850.7	160.018	15.5497	258.761	1.91893	29.2373
466	Chongqing	Phnom Penh
467	Chongqing	Siem Reap
468	Chongqing	Osaka
469	Chongqing	Phuket
470	Chongqing	Chiang Mai
471	Chongqing	Bangkok
472	Chongqing	Koh Samui
473	Chongqing	Krabi
[truncated: 1,237 more columns]
