# Supplementary material for: Impacts of the proposal of the CNG2020 strategy on aircraft emissions of China–foreign routes
Source: Copernicus journal article supplement (doi:10.5194/essd-14-4419-2022), 2022-09-27
Supplement: Supplementary file 2 [file essd-14-4419-2022-supplement.zip › Supplementary Tables/Supplementary Table S7.xlsx]

## Sheet: S6-2019 emissions(tons)
No.	Chinese cities/airports	Foreign cities	Air China												Emirates												Azerbaijan Airlines												Egypt Air
			LTO						CCD						LTO						CCD						LTO						CCD						LTO						CCD
			CO2	CO	HC	NOx	PM2.5	SO2	CO2	CO	HC	NOx	PM2.5	SO2	CO2	CO	HC	NOx	PM2.5	SO2	CO2	CO	HC	NOx	PM2.5	SO2	CO2	CO	HC	NOx	PM2.5	SO2	CO2	CO	HC	NOx	PM2.5	SO2	CO2	CO	HC	NOx	PM2.5	SO2	CO2	CO	HC	NOx	PM2.5
1	Beijing	Dubai	5051.71	13.9539	2.14182	28.0189	0.306454	6.19262	95517.3	554.79	85.3209	978.662	7.54095	117.09	19208.6	41.2903	1.33152	109.419	1.24017	23.5468	431224	1651.59	42.8039	4794.98	38.6815	528.615
2	Beijing	Baku																									1116.51	4.04751	0.692841	5.17027	0.0721034	1.36868	22808.6	159.683	27.5014	187.956	2.03034	27.9598
3	Beijing	Cairo																																					1670.78	2.65885	0.0855039	10.5415	0.106997	2.04812	50211.5	223.559	5.74549	878.8	5.74831
4	Beijing	Vienna	2165.02	5.98026	0.917923	12.0081	0.131337	2.65398	51664.4	300.081	46.1493	529.349	4.07883	63.3327
5	Beijing	Melbourne	2886.69	7.97369	1.2239	16.0108	0.175117	3.53864	76305.6	443.203	68.16	781.821	6.02422	93.539
6	Beijing	Sydney	5051.71	13.954	2.14182	28.0189	0.306454	6.19262	134301	780.056	119.964	1376.04	10.6029	164.633
7	Beijing	Lahore
8	Beijing	Karachi	5051.71	13.954	2.14182	28.0189	0.306454	6.19262	86315.5	501.343	77.1013	884.381	6.81448	105.81
9	Beijing	Islamabad	5051.71	13.954	2.14182	28.0189	0.306454	6.19262	64988.5	377.47	58.051	665.866	5.13075	79.666
10	Beijing	Saint Paul	2227.7	3.54513	0.114005	14.0554	0.142663	2.73082	71060.7	420.743	8.13117	1243.7	8.13516	87.1095
11	Beijing	Minsk	2886.69	7.97369	1.2239	16.0108	0.175117	3.53864	58403.3	339.222	52.1688	598.395	4.61085	71.5935
12	Beijing	Saipan
13	Beijing	Brussels
14	Beijing	Warsaw	2886.69	7.97369	1.2239	16.0108	0.175117	3.53864	63002	365.932	56.2766	645.513	4.97391	77.2308
15	Beijing	Pyongyang	881.019	4.18446	0.395764	2.30063	0.0492625	1.08	3231.94	33.429	3.20123	17.6571	0.330057	3.96187
16	Beijing	Copenhagen	2886.69	7.97369	1.2239	16.0108	0.175117	3.53864	66492.4	386.205	59.3944	681.275	5.24948	81.5095
17	Beijing	Dusseldorf	2165.02	5.98026	0.917923	12.0081	0.131337	2.65398	52834.8	306.879	47.1948	541.341	4.17123	64.7674
18	Beijing	Frankfurt	13485.6	47.2811	3.66752	85.0523	0.944036	16.5313	382706	2325.73	180.641	3938.49	27.8704	469.139
19	Beijing	Munich	5520.88	30.0998	3.1536	50.1875	0.438	6.76775	175772	1472.03	154.142	2313.09	13.805	215.47
20	Beijing	Saint Petersburg
21	Beijing	Chita	1174.69	5.57929	0.527686	3.0675	0.0656833	1.43999	4525.13	282.827	4.48213	24.7222	0.462122	5.54712
22	Beijing	Irkutsk
23	Beijing	Novosibirsk
24	Beijing	Moscow	5520.88	30.0998	3.1536	50.1875	0.438	6.76775	129083	1081.03	113.199	1698.68	10.1381	158.237
25	Beijing	Vladivostok
26	Beijing	Paris	10367.8	45.3577	3.90302	79.4926	0.752046	12.7094	202709	1633.36	163.443	2609.03	16.5866	248.49
27	Beijing	Nice	2165.02	5.98026	0.917923	12.0081	0.131337	2.65398	56577	328.614	50.5375	579.683	4.46667	69.3548
28	Beijing	Kalibo
29	Beijing	Manila	2055.71	8.3166	0.606776	7.17079	0.130086	2.51999	22259.6	178.455	13.0702	143.377	2.64587	27.2869
30	Beijing	Helsinki
31	Beijing	Tbilisi
32	Beijing	Havana	556.925	0.886283	0.0285013	3.51384	0.0356657	0.682706	26427.2	117.663	3.02395	462.527	3.02543	32.3957
33	Beijing	Almaty
34	Beijing	Cheongju
35	Beijing	Jeju	1174.69	4.75234	0.346729	4.09759	0.0743349	1.43999	5706.11	45.7459	3.35047	36.7537	0.678252	6.99482
36	Beijing	Busan	2055.71	8.3166	0.606776	7.17079	0.130086	2.51999	10726.3	85.9931	6.29821	69.0896	1.27498	13.1489
37	Beijing	Daegu
38	Beijing	Seoul	15389.5	49.2934	5.84392	74.4769	0.947415	18.8652	62206.4	414.667	48.172	545.449	5.87534	76.2555
39	Beijing	Amsterdam
40	Beijing	Montreal	3341.55	5.3177	0.171008	21.0831	0.213994	4.09623	116519	518.783	13.3328	2039.31	13.3393	142.835
41	Beijing	Toronto
42	Beijing	Vancouver	5520.88	30.0998	3.1536	50.1875	0.438	6.76775	186100	1558.52	163.199	2449	14.6162	228.131
43	Beijing	Calgary
44	Beijing	Sihanoukville
45	Beijing	Phnom Penh	873.118	3.791	0.401959	3.28832	0.0542244	1.07031	11479.1	100.207	10.5919	79.5946	1.19589	14.0717
46	Beijing	Siem Reap
47	Beijing	Prague
48	Beijing	Vientiane
49	Beijing	Male
50	Beijing	Sabah
51	Beijing	Kuala Lumpur	2886.69	7.97369	1.2239	16.0108	0.175117	3.53864	42108.5	244.577	37.6134	431.44	3.3244	51.6185
52	Beijing	Boston
53	Beijing	Chicago
54	Beijing	Dallas
55	Beijing	Las Vegas
56	Beijing	Los Angeles	11704.8	26.5742	2.82396	67.2898	0.751682	14.3482	378921	1988.75	172.529	5535.67	40.3655	464.499
57	Beijing	Houston	3943.48	21.4999	2.25257	35.8482	0.312857	4.83411	171032	1432.33	149.986	2250.71	13.4327	209.659
58	Beijing	Honolulu	2165.02	5.98026	0.917923	12.0081	0.131337	2.65398	51880.1	301.333	46.3419	531.559	4.09586	63.5971
59	Beijing	New York	19006.5	77.3809	6.82112	135.24	1.38204	23.299	730881	4922.54	429.743	8122.02	54.4223	895.949
60	Beijing	Washington	5520.88	30.0998	3.1536	50.1875	0.438	6.76775	223699	1873.39	196.171	2943.77	17.5691	274.221
61	Beijing	San Jose
62	Beijing	Seattle
63	Beijing	San Francisco	8753.43	21.4813	0.964434	42.0344	0.568607	10.7304	271334	1238.97	55.8198	2280.54	18.7402	332.614
64	Beijing	Ulan Bator	4111.42	16.6332	1.21355	14.3416	0.260172	5.03998	20302.5	162.765	11.9211	130.771	2.41324	24.8878
65	Beijing	Dacca
66	Beijing	Rangoon	1174.69	4.75234	0.346729	4.09759	0.0743349	1.43999	14766.3	118.381	8.67033	95.1112	1.75518	18.1012
67	Beijing	Naypyidaw
68	Beijing	Mexico City
69	Beijing	Tijuana
70	Beijing	Johannesburg	4732.18	25.7998	2.70309	43.0179	0.375429	5.80093	113603	951.381	99.6231	1494.96	8.92226	139.26
71	Beijing	Oslo
72	Beijing	Hiroshima	2936.73	11.8809	0.866823	10.244	0.185837	3.59998	11302.5	90.6124	6.63653	72.8009	1.34347	13.8552
73	Beijing	Okinawa	1174.69	4.75234	0.346729	4.09759	0.0743349	1.43999	8734.82	70.0271	5.12884	56.262	1.03826	10.7076
74	Beijing	Nagoya	2055.71	8.3166	0.606776	7.17079	0.130086	2.51999	15467.7	124.005	9.0822	99.6293	1.83856	18.9611
75	Beijing	Osaka	10103.4	27.9079	4.28364	56.0377	0.612908	12.3852	60054.1	348.81	53.6434	615.309	4.74118	73.6172
76	Beijing	Tokyo	22244.1	64.6615	9.50518	119.748	1.35234	27.2679	154703	953.905	138.747	1522.32	12.6916	189.642
77	Beijing	Sendai	1174.69	4.75234	0.346729	4.09759	0.0743349	1.43999	7484.27	60.0014	4.39455	48.2071	0.889612	9.17458
78	Beijing	Sapporo	5051.71	13.954	2.14182	28.0189	0.306454	6.19262	38427.8	223.199	34.3256	393.727	3.03381	47.1066
79	Beijing	Stockholm	5051.71	13.954	2.14182	28.0189	0.306454	6.19262	109447	635.699	97.7638	1121.39	8.6407	134.166
80	Beijing	Geneva	2165.02	5.98026	0.917923	12.0081	0.131337	2.65398	51691.5	300.238	46.1735	529.626	4.08097	63.3659
81	Beijing	Zurich	2886.69	7.97369	1.2239	16.0108	0.175117	3.53864	68463.3	397.653	61.1549	701.469	5.40508	83.9255
82	Beijing	Colombo
83	Beijing	Bangkok	7576.59	38.4164	3.76038	57.3583	0.568086	9.28774	105683	875.642	85.0475	1213.82	9.36221	129.552
84	Beijing	Chiang Mai	1164.16	5.05466	0.535945	4.38442	0.0722992	1.42708	14265.3	124.529	13.1627	98.9134	1.48615	17.4871
85	Beijing	Phuket	2055.71	8.3166	0.606776	7.17079	0.130086	2.51999	30323.9	243.107	17.8054	195.32	3.60443	37.1725
86	Beijing	Istanbul
87	Beijing	Ashkhabad
88	Beijing	Tashkent
89	Beijing	Barcelona	2165.02	5.98026	0.917923	12.0081	0.131337	2.65398	56788.3	329.841	50.7262	581.848	4.48335	69.6138
90	Beijing	Madrid	2227.7	3.54513	0.114005	14.0554	0.142663	2.73082	74388.9	331.205	8.51201	1301.95	8.51618	91.1894
91	Beijing	Athens	2165.02	5.98026	0.917923	12.0081	0.131337	2.65398	51435.7	298.752	45.945	527.006	4.06078	63.0524
92	Beijing	Singapore	13797.1	35.4158	3.09075	81.9209	0.87016	16.9132	156429	814.175	78.5161	2100.45	15.1346	191.758
93	Beijing	Auckland	3898.48	6.20398	0.199509	24.5969	0.24966	4.77894	135342	602.588	15.4866	2368.75	15.4942	165.909
94	Beijing	Budapest	5773.38	15.9474	2.44779	32.0216	0.350233	7.07728	70711.2	410.709	63.1628	724.5	5.58254	86.6811
95	Beijing	Teheran
96	Beijing	Tel Aviv
97	Beijing	Milan	6231.81	19.6173	0.963537	37.678	0.403773	7.63925	29793.7	167.623	7.87639	317.483	3.18876	36.5225
98	Beijing	Rome	3898.48	6.20398	0.199509	24.5969	0.24966	4.77894	115453	514.037	13.2108	2020.66	13.2173	141.528
99	Beijing	Mumbai	2886.69	7.97369	1.2239	16.0108	0.175117	3.53864	50999.7	296.22	45.5555	522.539	4.02635	62.5178
100	Beijing	New Delhi	3608.36	9.96711	1.52987	20.0135	0.218896	4.4233	46238.6	268.566	41.3027	473.757	3.65047	56.6815
101	Beijing	Bali
102	Beijing	Jakarta	2165.02	5.98026	0.917923	12.0081	0.131337	2.65398	38627.3	224.357	34.5038	395.772	3.04957	47.3511
103	Beijing	Edinburgh
104	Beijing	Manchester
105	Beijing	London	15419.5	59.3116	6.04484	107.511	1.0585	18.902	320689	2315.67	268.943	3814.4	25.8972	393.116
106	Beijing	Da Nang
107	Beijing	Hanoi	1164.16	5.05466	0.535945	4.38442	0.0722992	1.42708	11928.7	104.132	11.0068	82.712	1.24273	14.6228
108	Beijing	Ho Chi Minh City	2055.71	8.3166	0.606776	7.17079	0.130086	2.51999	27209.4	218.138	15.9766	175.259	3.23422	33.3546
109	Beijing	Nha Trang
110	Shanghai Pudong	Dubai													20489.2	44.0429	1.42029	116.714	1.32284	25.1166	557477	2135.14	55.336	6198.84	50.0066	683.382
111	Shanghai Pudong	Baku
112	Shanghai Pudong	Vienna
113	Shanghai Pudong	Brisbane
114	Shanghai Pudong	Melbourne
115	Shanghai Pudong	Sydney
116	Shanghai Pudong	Saipan
117	Shanghai Pudong	Brussels
118	Shanghai Pudong	Pyongyang
119	Shanghai Pudong	Copenhagen
120	Shanghai Pudong	Frankfurt	4846.96	15.2579	0.749418	29.3051	0.314046	5.94164	26173.6	147.256	6.91937	278.907	2.80131	32.0848
121	Shanghai Pudong	Munich	2077.27	6.53909	0.321179	12.5593	0.134591	2.54642	11115.8	62.5389	2.93862	118.45	1.1897	13.6262
122	Shanghai Pudong	Saint Petersburg
123	Shanghai Pudong	Novosibirsk
124	Shanghai Pudong	Moscow
125	Shanghai Pudong	Vladivostok
126	Shanghai Pudong	Paris	5051.71	13.954	2.14182	28.0189	0.306454	6.19262	135095	784.665	120.673	1384.17	10.6655	165.605
127	Shanghai Pudong	Cebu
128	Shanghai Pudong	Kalibo
129	Shanghai Pudong	Manila
130	Shanghai Pudong	Helsinki
131	Shanghai Pudong	Jeju
132	Shanghai Pudong	Busan
133	Shanghai Pudong	Daegu
134	Shanghai Pudong	Seoul
135	Shanghai Hongqiao	Seoul
136	Shanghai Pudong	Muan
137	Shanghai Pudong	Amsterdam
138	Shanghai Pudong	Montreal
139	Shanghai Pudong	Toronto
140	Shanghai Pudong	Vancouver
141	Shanghai Pudong	Sihanoukville
142	Shanghai Pudong	Phnom Penh
143	Shanghai Pudong	Siem Reap
144	Shanghai Pudong	Prague
145	Shanghai Pudong	Vientiane
146	Shanghai Pudong	Male
147	Shanghai Pudong	Sabah
148	Shanghai Pudong	Kuala Lumpur
149	Shanghai Pudong	Anchorage	6331.84	22.2836	2.16378	38.2588	0.405275	7.76187	176691	1185.45	115.195	1916.97	14.2306	216.596
150	Shanghai Pudong	Atlanta
151	Shanghai Pudong	Boston
152	Shanghai Pudong	Chicago
153	Shanghai Pudong	Dallas
154	Shanghai Pudong	Los Angeles	1407.08	4.9519	0.480841	8.50196	0.0900611	1.72486	55499.3	372.355	36.1833	602.129	4.46989	68.0337
155	Shanghai Pudong	Honolulu
156	Shanghai Pudong	New York
157	Shanghai Pudong	Seattle
158	Shanghai Pudong	San Francisco
159	Shanghai Pudong	Mandalay
160	Shanghai Pudong	Rangoon
161	Shanghai Pudong	Naypyidaw
162	Shanghai Pudong	Mexico City
163	Shanghai Pudong	Niigata
164	Shanghai Pudong	Fukuoka	2037.28	8.84566	0.937904	7.67274	0.126524	2.49739	8654.4	75.5485	7.98551	60.0084	0.901612	10.609
165	Shanghai Pudong	Komatsu
166	Shanghai Pudong	Kagoshima
167	Shanghai Pudong	Saga
168	Shanghai Pudong	Hiroshima
169	Shanghai Pudong	Hanamaki
170	Shanghai Pudong	Matsuyama
171	Shanghai Pudong	Okinawa
172	Shanghai Pudong	Okayama
173	Shanghai Pudong	Nagoya	2037.28	8.84566	0.937904	7.67274	0.126524	2.49739	11696.3	102.103	10.7923	81.1007	1.21852	14.3379
174	Shanghai Pudong	Nagasaki
175	Shanghai Pudong	Osaka	12140.7	36.7536	5.22154	63.7105	0.739432	14.8826	51415.4	329.521	46.2384	491.778	4.32595	63.0275
176	Shanghai Hongqiao	Tokyo
177	Shanghai Pudong	Tokyo	12159.1	36.2245	4.89042	63.2085	0.742994	14.9052	72012.9	450.901	59.8037	681.627	6.27501	88.2768
178	Shanghai Pudong	Takamatsu
179	Shanghai Pudong	Sendai	587.346	2.37617	0.173365	2.0488	0.0371674	0.719997	4551.55	36.4898	2.67254	29.3171	0.541016	5.57951
180	Shanghai Pudong	Sapporo
181	Shanghai Pudong	Toyama
182	Shanghai Pudong	Ibaraki
183	Shanghai Pudong	Shizuoka
184	Shanghai Pudong	Stockholm
185	Shanghai Pudong	Zurich
186	Shanghai Pudong	Colombo
187	Shanghai Pudong	Bangkok	2037.28	8.84566	0.937904	7.67274	0.126524	2.49739	24072	210.137	22.2116	166.912	2.50782	29.5087
188	Shanghai Pudong	Chiang Mai
189	Shanghai Pudong	Phuket
190	Shanghai Pudong	Istanbul
191	Shanghai Pudong	Seri Begawan
192	Shanghai Pudong	Barcelona	2886.69	7.97369	1.2239	16.0108	0.175117	3.53864	87604.9	508.833	78.2532	897.593	6.91628	107.39
193	Shanghai Pudong	Madrid
194	Shanghai Pudong	Singapore
195	Shanghai Pudong	Auckland
196	Shanghai Pudong	Budapest
197	Shanghai Pudong	Teheran
198	Shanghai Pudong	Tel Aviv
199	Shanghai Pudong	Milan	4846.96	15.2579	0.749418	29.3051	0.314046	5.94164	25733	144.778	6.80291	274.213	2.75416	31.5448
200	Shanghai Pudong	Rome
201	Shanghai Pudong	Mumbai
202	Shanghai Pudong	New Delhi
203	Shanghai Pudong	Bali
204	Shanghai Pudong	Jakarta
205	Shanghai Pudong	London
206	Shanghai Pudong	Da Nang
207	Shanghai Pudong	Haiphong
208	Shanghai Pudong	Hanoi
209	Shanghai Pudong	Ho Chi Minh City
210	Shanghai Pudong	Nha Trang
211	Guangzhou	Dubai													8964.01	19.2688	0.621376	51.0623	0.578744	10.9885	200449	767.72	19.8969	2228.88	17.9806	245.72
212	Guangzhou	Baku
213	Guangzhou	Cairo																																					5520.88	30.0998	3.1536	50.1875	0.438	6.76775	182124	1525.22	159.712	2396.67	14.3039
214	Guangzhou	Vienna
215	Guangzhou	Adelaide
216	Guangzhou	Brisbane
217	Guangzhou	Melbourne
218	Guangzhou	Perth
219	Guangzhou	Saipan
220	Guangzhou	Frankfurt
221	Guangzhou	Saint Petersburg
222	Guangzhou	Irkutsk
223	Guangzhou	Novosibirsk
224	Guangzhou	Moscow
225	Guangzhou	Paris
226	Guangzhou	Cebu
227	Guangzhou	Manila
228	Guangzhou	Helsinki
229	Guangzhou	Almaty
230	Guangzhou	Busan
231	Guangzhou	Seoul
232	Guangzhou	Amsterdam
233	Guangzhou	Bishkek
234	Guangzhou	Toronto
235	Guangzhou	Vancouver
236	Guangzhou	Sihanoukville
237	Guangzhou	Phnom Penh
238	Guangzhou	Siem Reap
239	Guangzhou	Nairobi
240	Guangzhou	Vientiane
241	Guangzhou	Male
242	Guangzhou	Sabah
243	Guangzhou	Langkawi
244	Guangzhou	Kuala Lumpur
245	Guangzhou	Penang
246	Guangzhou	Anchorage
247	Guangzhou	Los Angeles
248	Guangzhou	New York
249	Guangzhou	San Francisco
250	Guangzhou	Ulan Bator
251	Guangzhou	Dacca
252	Guangzhou	Mandalay
253	Guangzhou	Rangoon
254	Guangzhou	Mexico City
255	Guangzhou	Johannesburg
256	Guangzhou	Katmandu
257	Guangzhou	Nagoya
258	Guangzhou	Osaka
259	Guangzhou	Tokyo
260	Guangzhou	Colombo
261	Guangzhou	Bangkok
262	Guangzhou	Chiang Mai
263	Guangzhou	Krabi
264	Guangzhou	Phuket
265	Guangzhou	Istanbul
266	Guangzhou	Singapore
267	Guangzhou	Auckland
268	Guangzhou	Teheran
269	Guangzhou	Rome
270	Guangzhou	Mumbai
271	Guangzhou	New Delhi
272	Guangzhou	Bali
273	Guangzhou	Jakarta
274	Guangzhou	London
275	Guangzhou	Da Nang
276	Guangzhou	Hanoi
277	Guangzhou	Phu Quoc Island
278	Guangzhou	Ho Chi Minh City
279	Guangzhou	Nha Trang
280	Changchun	Jeju
281	Changchun	Seoul
282	Changchun	Tokyo
283	Changchun	Nagoya
284	Changsha	Frankfurt
285	Changsha	Jeju
286	Changsha	Seoul
287	Changsha	Bangkok
288	Changsha	Phuket
289	Changsha	Hanoi
290	Changsha	Da Nang
291	Chengdu	Melbourne
292	Chengdu	Sydney	2165.02	5.98026	0.917923	12.0081	0.131337	2.65398	56229	326.593	50.2266	576.117	4.4392	68.9282
293	Chengdu	Frankfurt	2165.02	5.98026	0.917923	12.0081	0.131337	2.65398	57599	334.55	51.4504	590.155	4.54736	70.6076
294	Chengdu	Seoul	1455.2	6.31833	0.669931	5.48053	0.090374	1.78385	14123.1	123.287	13.0315	97.9274	1.47134	17.3127
295	Chengdu	Siem Reap
296	Chengdu	Male
297	Chengdu	Sabah
298	Chengdu	Katmandu	6111.83	18.3503	1.63136	15.8679	0.275193	7.49217	32406	357.817	30.793	286.191	4.89652	39.7248
299	Chengdu	Krabi
300	Chengdu	Bangkok	2037.28	8.84566	0.937904	7.67274	0.126524	2.49739	17983	156.983	16.5931	124.692	1.87346	22.0444
301	Chengdu	Phuket	2037.28	8.84566	0.937904	7.67274	0.126524	2.49739	20458	178.588	18.8768	141.853	2.13131	25.0784
302	Chengdu	Chiang Mai
303	Chengdu	Surat Thani
304	Chengdu	Singapore	2037.28	8.84566	0.937904	7.67274	0.126524	2.49739	25833.7	225.515	23.837	179.127	2.69134	31.6682
305	Dalian	Jeju
306	Dalian	Seoul
307	Dalian	Osaka	2055.71	8.3166	0.606776	7.17079	0.130086	2.51999	11467	91.9309	6.73309	73.8602	1.36301	14.0568
308	Dalian	Tokyo	1174.69	4.75234	0.346729	4.09759	0.0743349	1.43999	7918	63.4786	4.64922	51.0007	0.941166	9.70626
309	Dalian	Fukuoka.	2055.71	8.3166	0.606776	7.17079	0.130086	2.51999	10257.7	82.2363	6.02305	66.0712	1.21928	12.5744
310	Dalian	Toyama
311	Dalian	Hiroshima	1468.37	5.94043	0.433411	5.12199	0.0929186	1.79999	7051.73	56.5337	4.14058	45.421	0.838198	8.64434
312	Dalian	Nagoya
313	Fuzhou	Kuala Lumpur
314	Fuzhou	Osaka
315	Fuzhou	Bangkok
316	Fuzhou	Singapore
317	Fuzhou	Jakarta
318	Guiyang	Phuket
319	Guiyang	Bangkok
320	Guiyang	Singapore
321	Guilin	Seoul
322	Harbin	Osaka
323	Harbin	Tokyo
324	Harbin	Nagoya
325	Harbin	Niigata
326	Haikou	Singapore
327	Haikou	Bangkok
328	Hailar	Chita	587.346	2.78964	0.263843	1.53375	0.0328417	0.719997	1552.96	16.0627	1.5382	8.4843	0.158594	1.90369
329	Hangzhou	Jeju
330	Hangzhou	Cheongju
331	Hangzhou	Seoul	2037.28	8.84566	0.937904	7.67274	0.126524	2.49739	9799.11	85.5412	9.04175	67.9456	1.02087	12.0122
332	Hangzhou	Okinawa
333	Hangzhou	Bangkok	4074.55	22.7996	1.87581	35.6916	0.253047	4.99478	44126.7	385.204	40.7162	305.968	4.5971	54.0926
334	Hangzhou	Phuket	873.118	5.98026	0.401959	12.0081	0.0542244	1.07031	10906.1	95.205	10.0632	75.6216	1.1362	13.3693
335	Hangzhou	Da Nang
336	Hefei	Seoul
337	Jinan	Nagoya
338	Jinan	Osaka
339	Jinan	Seoul
340	Jinan	Bangkok
341	Kiamusze	Seoul
342	Jieyang	Bangkok
343	Kunming	Dubai
344	Kunming	Paris
345	Kunming	Seoul
346	Kunming	Siem Reap
347	Kunming	Vientiane
348	Kunming	Dacca
349	Kunming	Mandalay
350	Kunming	Naypyidaw
351	Kunming	Rangoon	2037.28	8.84566	0.937904	7.67274	0.126524	2.49739	9131.9	79.7168	8.42611	63.3193	0.951357	11.1943
352	Kunming	Katmandu
353	Kunming	Colombo
354	Kunming	Bangkok
355	Kunming	Phuket.
356	Kunming	Chiang Rai
357	Kunming	Chiang Mai
358	Kunming	Singapore
359	Kunming	Calcutta
360	Kunming	New Delhi
361	Kunming	Da Nang
362	Kunming	Hanoi
363	Kunming	Ho Chi Minh City
364	Kunming	Nha Trang
365	Kunming	Jakarta
366	Kunming	Bali
367	Lhasa	Katmandu	873.118	3.791	0.401959	3.28832	0.0542244	1.07031	2425.04	21.1694	2.23761	16.8149	0.25264	2.97273
368	Lanzhou	Bangkok
369	Manchuria	Irkutsk
370	Mudanjiang	Seoul
371	Nanchang	Bangkok
372	Nanjing	Sydney
373	Nanjing	Jeju
374	Nanjing	Seoul
375	Nanjing	Busan
376	Nanjing	Sihanoukville
377	Nanjing	Siem Reap
378	Nanjing	Osaka
379	Nanjing	Tokyo
380	Nanjing	Phuket
381	Nanjing	Chiang Mai
382	Nanjing	Da Nang
383	Nanning	Phnom Penh
384	Nanning	Vientiane
385	Nanning	Rangoon
386	Nanning	Phuket
387	Nanning	Chiang Mai
388	Nanning	Bangkok
389	Nanning	Singapore
390	Nanning	Jakarta
391	Nanning	Hanoi
392	Nanning	Ho Chi Minh City
393	Ningbo	Jeju
394	Ningbo	Bangkok
395	Qingdao	Seoul
396	Qingdao	Busan
397	Qingdao	Jeju
398	Qingdao	Osaka
399	Qingdao	Tokyo
400	Qingdao	Fukuoka
401	Qingdao	Nagoya
402	Qingdao	Bangkok
403	Qingdao	Phuket
404	Shenzhen	Seoul
405	Shenzhen	Sabah
406	Shenzhen	Tokyo
407	Shenzhen	Nagoya
408	Shenzhen	Osaka
409	Shenzhen	Bangkok
410	Shenzhen	Phuket
411	Shenzhen	Chiang Mai
412	Shenzhen	Chiang Rai
413	Shenzhen	Singapore
414	Shenzhen	Bali
415	Shenzhen	Jakarta
416	Shenzhen	Hanoi
417	Shenzhen	Ho Chi Minh City
418	Shenzhen	Haiphong
419	Shenzhen	Nha Trang
420	Shenzhen	Da Nang
421	Shenyang	Irkutsk
422	Shenyang	Moscow
423	Shenyang	Daegu
424	Shenyang	Busan
425	Shenyang	Jeju
426	Shenyang	Cheongju
427	Shenyang	Seoul
428	Shenyang	Vancouver
429	Shenyang	Osaka
430	Shenyang	Tokyo
431	Shenyang	Nagoya
432	Shijiazhuang	Seoul
433	Shijiazhuang	Busan
434	Taiyuan	Osaka
435	Taiyuan	Bangkok
436	Tianjin	Jeju
437	Tianjin	Seoul	3230.4	13.0689	0.953505	11.2684	0.204421	3.95998	13389.7	107.345	7.86204	86.2444	1.59155	16.4137
438	Tianjin	Sihanoukville
439	Tianjin	Okinawa	587.346	2.37617	0.173365	2.0488	0.0371674	0.719997	4074.68	32.6667	2.39253	26.2455	0.484333	4.99493
440	Tianjin	Osaka	6167.14	36.2245	4.89042	63.2085	0.742994	7.55997	30967.9	631.568	88.1966	1007.58	8.7214	37.9619
441	Tianjin	Tokyo
442	Tianjin	Nagoya
443	Tianjin	Sapporo
444	Tianjin	Bangkok	2055.71	8.3166	0.606776	7.17079	0.130086	2.51999	25793.2	206.784	15.1451	166.137	3.06589	31.6186
445	Tianjin	Phuket
446	Weihai	Seoul
447	Wenzhou	Jeju
448	Wenzhou	Seoul
449	Wenzhou	Bangkok
450	Urumqi	Dubai
451	Urumqi	Baku
452	Urumqi	Islamabad
453	Urumqi	Moscow
454	Urumqi	Novosibirsk
455	Urumqi	Tbilisi
456	Urumqi	Almaty
457	Urumqi	Seoul
458	Urumqi	Jeju
459	Urumqi	Bishkek
460	Urumqi	Dushanbe
461	Urumqi	Khujand
462	Urumqi	Ashkhabad
463	Urumqi	Tashkent
464	Urumqi	Teheran
465	Wuxi	Osaka
466	Wuxi	Bangkok
467	Wuxi	Singapore
468	Wuhan	Moscow
469	Wuhan	Seoul
470	Wuhan	Siem Reap
471	Wuhan	Kuala Lumpur
472	Wuhan	Sabah
473	Wuhan	Osaka
474	Wuhan	Tokyo
475	Wuhan	Bangkok
476	Wuhan	Phuket
477	Wuhan	Chiang Mai	291.039	1.26367	0.133986	1.09611	0.0180748	0.35677	2323.77	20.2853	2.14417	16.1127	0.242089	2.84859
478	Wuhan	Singapore
479	Xi'an	Moscow
480	Xi'an	Paris
481	Xi'an	Jeju
482	Xi'an	Seoul
483	Xi'an	Tokyo
484	Xi'an	Nagoya
485	Xi'an	Siem Reap
486	Xi'an	Bangkok
487	Xi'an	Phuket
488	Xiamen	Manila
489	Xiamen	Seoul
490	Xiamen	Siem Reap
491	Xiamen	Kuala Lumpur
492	Xiamen	Bangkok
493	Xiamen	Singapore
494	Xiamen	Jakarta
495	Yantai	Seoul
496	Yantai	Osaka
497	Yantai	Nagoya
498	Yanji	Vladivostok
499	Yanji	Busan
500	Yanji	Cheongju
501	Yanji	Seoul	2055.71	8.3166	0.606776	7.17079	0.130086	2.51999	6382.82	51.1711	3.74781	41.1125	0.758688	7.82436
502	Yancheng	Seoul
503	Zhangjiajie	Daegu
504	Zhangjiajie	Seoul
505	Zhangjiajie	Busan
506	Zhangjiajie	Cheongju
507	Zhengzhou	Seoul
508	Zhengzhou	Bangkok
509	Zhengzhou	Phuket
510	Chongqing	Sydney
511	Chongqing	Jeju
512	Chongqing	Seoul	1174.69	4.75234	0.346729	4.09759	0.0743349	1.43999	9211.59	73.8493	5.40878	59.3329	1.09493	11.292
513	Chongqing	Amsterdam
514	Chongqing	Phnom Penh
515	Chongqing	Siem Reap
516	Chongqing	Osaka
517	Chongqing	Phuket
518	Chongqing	Chiang Mai
519	Chongqing	Bangkok
520	Chongqing	Koh Samui
521	Chongqing	Krabi
[truncated: 1,393 more columns]
